# Supplementary material for: The Role of APOSTART in Switching between Sexuality and Apomixis in Poa pratensis
Source: MDPI journal article supplement (doi:10.3390/genes11080941), 2020-08-14
Supplement: s1 [file s1]

**Figure S2.** Nucleotidic alignment of 15 APOSTART cDNA and 8 APOSTART genomic clones.

– Section 2

268

|                 |       |                                                                                                                                                                           |     |     |     |     |     |     |     |     |     |     |     |     | Section 3 |
|-----------------|-------|---------------------------------------------------------------------------------------------------------------------------------------------------------------------------|-----|-----|-----|-----|-----|-----|-----|-----|-----|-----|-----|-----|-----------|
|                 | (269) | 269                                                                                                                                                                       | 280 | 290 | 300 | 310 | 320 | 330 | 340 | 350 | 360 | 370 | 380 | 390 | 402       |
| APOSTART 1      | (112) | -----                                                                                                                                                                     |     |     |     |     |     |     |     |     |     |     |     |     |           |
| APOSTART 2      | (112) | -----                                                                                                                                                                     |     |     |     |     |     |     |     |     |     |     |     |     |           |
| APOSTART_3      | (112) | -----                                                                                                                                                                     |     |     |     |     |     |     |     |     |     |     |     |     |           |
| APOSTART_4      | (112) | -----                                                                                                                                                                     |     |     |     |     |     |     |     |     |     |     |     |     |           |
| APOSTART_5      | (112) | -----                                                                                                                                                                     |     |     |     |     |     |     |     |     |     |     |     |     |           |
| APOSTART_6      | (112) | -----                                                                                                                                                                     |     |     |     |     |     |     |     |     |     |     |     |     |           |
| APOSTART 7      | (112) | -----                                                                                                                                                                     |     |     |     |     |     |     |     |     |     |     |     |     |           |
| APOSTART_8      | (112) | -----                                                                                                                                                                     |     |     |     |     |     |     |     |     |     |     |     |     |           |
| APOSTART_9      | (112) | -----                                                                                                                                                                     |     |     |     |     |     |     |     |     |     |     |     |     |           |
| APOSTART_10     | (112) | -----                                                                                                                                                                     |     |     |     |     |     |     |     |     |     |     |     |     |           |
| APOSTART_11     | (112) | -----                                                                                                                                                                     |     |     |     |     |     |     |     |     |     |     |     |     |           |
| APOSTART_12     | (112) | -----                                                                                                                                                                     |     |     |     |     |     |     |     |     |     |     |     |     |           |
| APOSTART_14     | (112) | -----                                                                                                                                                                     |     |     |     |     |     |     |     |     |     |     |     |     |           |
| APOSTART_15     | (112) | -----                                                                                                                                                                     |     |     |     |     |     |     |     |     |     |     |     |     |           |
| APOSTART_13     | (112) | -----                                                                                                                                                                     |     |     |     |     |     |     |     |     |     |     |     |     |           |
| APOSTART_1_GEN  | (262) | CAAATTGTAATTCTTATGAATGAATGCCAACCTGATAACTTTGTCTTACAGATGCCAATTA                                                                                                             |     |     |     |     |     |     |     |     |     |     |     |     |           |
| APOSTART_2_GEN  | (262) | ACTGTAATTCTTGGTCTGAAACAGAAATGTAATCTTTTTCTCCCTGACACATAAGAAATAATTTTATATTT                                                                                                   |     |     |     |     |     |     |     |     |     |     |     |     |           |
| APOSTART_5_GEN  | (263) | GTGTTTTCTGAAAGGGAGGCGCAATGCTGTCTTGCAAAGTGGAATTTTCGCCGTTGAAATTTT                                                                                                           |     |     |     |     |     |     |     |     |     |     |     |     |           |
| APOSTART_6_GEN  | (231) | TCCACTTACAAGGATGTCGGCCACCCGATAATTTTATCTC-----ACCAATGTCAATTAATTGTAAACTG                                                                                                    |     |     |     |     |     |     |     |     |     |     |     |     |           |
| APOSTART_7_GEN  | (268) | AAATTTTCCAATTCAAAGGATGTCGGCCACCGGATAAAATCTATCTCACCAATGTCAATTAA-----TTGTAAACTTTGTGCTCCTCTGACAGATAAAAAAGTTTAA                                                               |     |     |     |     |     |     |     |     |     |     |     |     |           |
| APOSTART_8_GEN  | (262) | AACTGGTTCAAATTGTCAGTTCTTATGAATGAATGCCAACCTGACAACTTTGTCTTACATATGCCAATTA                                                                                                    |     |     |     |     |     |     |     |     |     |     |     |     |           |
| APOSTART_10_GEN | (262) | ACTGTAATTCTTGGTGTGAAATAGAGTTGTAATCTTTTTTCTCCCTGACACATCAGAATTAGTTTTATAGTT                                                                                                  |     |     |     |     |     |     |     |     |     |     |     |     |           |
| APOSTART_12_GEN | (262) | CAAATTGTAATTCTTATGAATGAATGCCAACCTGATAACTTTGTCTTACAGATGCCAATTA                                                                                                             |     |     |     |     |     |     |     |     |     |     |     |     |           |
|                 |       | ACTGTAATTCTTGGTCTGAAACAGAAATGTAATCTTTTTCTCCCTGACACATAAGAAATAATTTTATATTT                                                                                                   |     |     |     |     |     |     |     |     |     |     |     |     |           |
|                 |       | CAAATTGCAGTTCTTATGAATGAATGCCAACCTGACAACTTTGTCTTACATATGCCAATTA                                                                                                             |     |     |     |     |     |     |     |     |     |     |     |     |           |
|                 |       | ACTGTAATTCTTGGTGTGAAATAGAGTTGTAATCTTTTTTCTCCCTGACACATCAGAATTAGTTTTATAGTT                                                                                                  |     |     |     |     |     |     |     |     |     |     |     |     |           |
|                 |       |                                                                                                                                                                           |     |     |     |     |     |     |     |     |     |     |     |     | Section 4 |
|                 | (403) | 403                                                                                                                                                                       | 410 | 420 | 430 | 440 | 450 | 460 | 470 | 480 | 490 | 500 | 510 | 520 | 536       |
| APOSTART 1      | (112) | -----                                                                                                                                                                     |     |     |     |     |     |     |     |     |     |     |     |     |           |
| APOSTART 2      | (112) | -----                                                                                                                                                                     |     |     |     |     |     |     |     |     |     |     |     |     |           |
| APOSTART_3      | (112) | -----                                                                                                                                                                     |     |     |     |     |     |     |     |     |     |     |     |     |           |
| APOSTART_4      | (112) | -----                                                                                                                                                                     |     |     |     |     |     |     |     |     |     |     |     |     |           |
| APOSTART_5      | (112) | -----                                                                                                                                                                     |     |     |     |     |     |     |     |     |     |     |     |     |           |
| APOSTART_6      | (112) | -----                                                                                                                                                                     |     |     |     |     |     |     |     |     |     |     |     |     |           |
| APOSTART 7      | (112) | -----                                                                                                                                                                     |     |     |     |     |     |     |     |     |     |     |     |     |           |
| APOSTART_8      | (112) | -----                                                                                                                                                                     |     |     |     |     |     |     |     |     |     |     |     |     |           |
| APOSTART_9      | (112) | -----                                                                                                                                                                     |     |     |     |     |     |     |     |     |     |     |     |     |           |
| APOSTART_10     | (112) | -----                                                                                                                                                                     |     |     |     |     |     |     |     |     |     |     |     |     |           |
| APOSTART_11     | (112) | -----                                                                                                                                                                     |     |     |     |     |     |     |     |     |     |     |     |     |           |
| APOSTART_12     | (112) | -----                                                                                                                                                                     |     |     |     |     |     |     |     |     |     |     |     |     |           |
| APOSTART_14     | (112) | -----                                                                                                                                                                     |     |     |     |     |     |     |     |     |     |     |     |     |           |
| APOSTART_15     | (112) | -----                                                                                                                                                                     |     |     |     |     |     |     |     |     |     |     |     |     |           |
| APOSTART_13     | (112) | -----                                                                                                                                                                     |     |     |     |     |     |     |     |     |     |     |     |     |           |
| APOSTART_1_GEN  | (396) | CTTTCAAAAGTATATTTTCT-GCA--TTTTAATTATAATTCTGATATCACTATTTAAT-----GATATTCAAAAATTTGATCATGCTGTCTGATGGCTAAATTCAGATAGCACCTCGGAACCTCTGGTTTTTTT                                    |     |     |     |     |     |     |     |     |     |     |     |     |           |
| APOSTART_2_GEN  | (396) | CTTTCAAAAGTATATTTTCCAGCATTTTTTTTATTATAAATTCTGATATCACTATTTAAT-----GAAATTCAAAAATTTGATCATGATGTCTGATGGCTAAATTCAGATAGCACCTCGGAACCTCTGGTTTTTCT                                  |     |     |     |     |     |     |     |     |     |     |     |     |           |
| APOSTART_5_GEN  | (392) | TGTGCTTTTTTACCTGCATTTCATGTTATTTCTGATGAACTGATGAGATTA---TTGATCCTAATGTGATTTCGAAAAGATGATGCTGC-----CTAAATTCGAAAAG-A-----TTTGG---C-                                             |     |     |     |     |     |     |     |     |     |     |     |     |           |
| APOSTART_6_GEN  | (340) | TTACCATCATTTCATGTT--A-----TTTCGGATGAACTGATGAGGTTACTA---ACCCTGATATGATTTCGAAAAGATTATTCTGCA-----TAAGTTCCAGTAGCACACTAGA-----TTTG---                                           |     |     |     |     |     |     |     |     |     |     |     |     |           |
| APOSTART_7_GEN  | (402) | GTTTCAATAATAGATTTTTTCTGCA-TTTTTTGTTAGAATTCTGATATCACTATTTGATCGTAAAGAAATTC                                                                                                  |     |     |     |     |     |     |     |     |     |     |     |     |           |
| APOSTART_8_GEN  | (396) | CAAAAAGTTTATCGTGCTGTCTGATGGCTAAATTCAGATAGCACCTCGGAACCTCTGGTTTTTTTCTTTTCAAAAGTATATTTTCT--GCATTTTAATTATAA                                                                   |     |     |     |     |     |     |     |     |     |     |     |     |           |
| APOSTART_10_GEN | (396) | TTCTGATATCACTATTTAAT-----GATATTCAAAAATTTGATCATGCTGTCTGATGGCTAAATTCAGATAGCACCTCGGAACCTCTGGTTTTTTTCTTTTCAAAAGTATATTTTCT-GCA--TTTTAATTATAA                                   |     |     |     |     |     |     |     |     |     |     |     |     |           |
| APOSTART_12_GEN | (396) | TTCTGATATCACTATTTAAT-----GATATTCAAAAATTTGATCATGCTGTCTGATGGCTAAATTCAGATAGCACCTCGGAACCTCTGGTTTTTTTGTTTCAATAATAGATTTTTTC-TGCATTTTTTTGTTAGAATTCTGATATCACTATTTGATCGTAAAGAAATTC |     |     |     |     |     |     |     |     |     |     |     |     |           |

|                 | (537) | 537                                 | 550                                                        | 560                 | 570                       | 580                                                        | 590                 | 600   | 610   | 620   | 630   | 640   | 650   | 660   | 670   |
|-----------------|-------|-------------------------------------|------------------------------------------------------------|---------------------|---------------------------|------------------------------------------------------------|---------------------|-------|-------|-------|-------|-------|-------|-------|-------|
| APOSTART_1      | (112) | -----                               | -----                                                      | -----               | -----                     | GTGCCGCTGAAGTCGCTGCTAATAGACGGGAACTGCAGGGTGGAGGATAGAGGGCTC  | AAAAACACATCATGGGCAA | ----- | ----- | ----- | ----- | ----- | ----- | ----- | ----- |
| APOSTART_2      | (112) | -----                               | -----                                                      | -----               | -----                     | GTGCCGCTGAAGTCGCTGCTAATCGATGGGAACTGCAGGGTGGAGGATAGAGGGCTC  | AAAAACACATCATGGGCAA | ----- | ----- | ----- | ----- | ----- | ----- | ----- | ----- |
| APOSTART_3      | (112) | -----                               | -----                                                      | -----               | -----                     | GTGCCGCTGAAGTCGCTGCTAATAGACGGGAACTGCAGGGTGGAGGATAGAGGGCTC  | AAAAACACATCATGGGCAA | ----- | ----- | ----- | ----- | ----- | ----- | ----- | ----- |
| APOSTART_4      | (112) | -----                               | -----                                                      | -----               | -----                     | GTGCCGCTGAAGTCGCTGCTAATCGATGGGAACTGCAGGGTGGAGGATAGAGGGCTC  | AAAAACACATCATGGGCAA | ----- | ----- | ----- | ----- | ----- | ----- | ----- | ----- |
| APOSTART_5      | (112) | -----                               | -----                                                      | -----               | -----                     | GTGCCCTCTTAAGTCTCTGCTAATCGACGGGAACTGCAGGGTGGAGGACAGAGGACTC | AAAAACACATCATGGGCAA | ----- | ----- | ----- | ----- | ----- | ----- | ----- | ----- |
| APOSTART_6      | (112) | -----                               | -----                                                      | -----               | -----                     | GTGCCCTCTTAAGTCGCTGCTAATCGACGGGAACTGCAGGGTGGAGGACAGAGGACTC | AAAAACACATCATGGGCAA | ----- | ----- | ----- | ----- | ----- | ----- | ----- | ----- |
| APOSTART_7      | (112) | -----                               | -----                                                      | -----               | -----                     | GTGCCGCTGAAGTCGCTGCTAATCGATGGGAACTGCAGGGTGGAGGATAGAGGGCTC  | AAAAACACATCATGGGCAA | ----- | ----- | ----- | ----- | ----- | ----- | ----- | ----- |
| APOSTART_8      | (112) | -----                               | -----                                                      | -----               | -----                     | GTGCCGCTGAAGTCGCTGCTAATAGACGGGAACTGCAGGGTGGAGGATAGAGGGCTC  | AAAAACACATCATGGGCAA | ----- | ----- | ----- | ----- | ----- | ----- | ----- | ----- |
| APOSTART_9      | (112) | -----                               | -----                                                      | -----               | -----                     | GTGCCGCTGAAGTCGCTGCTAATAGACGGGAACTGCAGGGTGGAGGATAGAGGGCTC  | AAAAACACATCATGGGCAA | ----- | ----- | ----- | ----- | ----- | ----- | ----- | ----- |
| APOSTART_10     | (112) | -----                               | -----                                                      | -----               | -----                     | GTGCCGCTGAAGTCGCTGCTAATAGACGGGAACTGCAGGGTGGAGGATAGAGGGCTC  | AAAAACACATCATGGGCAA | ----- | ----- | ----- | ----- | ----- | ----- | ----- | ----- |
| APOSTART_11     | (112) | -----                               | -----                                                      | -----               | -----                     | GTGCCGCTGAAGTCGCTGCTAATAGACGGGAACTGCAGGGTGGAGGATAGAGGGCTC  | AAAAACACATCATGGGCAA | ----- | ----- | ----- | ----- | ----- | ----- | ----- | ----- |
| APOSTART_12     | (112) | -----                               | -----                                                      | -----               | -----                     | GTGCCGCTGAAGTCGCTGCTAATCGATGGGAACTGCAGGGTGGAGGATAGAGGGCTC  | AAAAACACATCATGGGCAA | ----- | ----- | ----- | ----- | ----- | ----- | ----- | ----- |
| APOSTART_14     | (112) | -----                               | -----                                                      | -----               | -----                     | GTGCCGCTGAAGTCGCTGCTAATCGATGGGAACTGCAGGGTGGAGGATAGAGGGCTC  | AAAAACACATCATGGGCAA | ----- | ----- | ----- | ----- | ----- | ----- | ----- | ----- |
| APOSTART_15     | (112) | -----                               | -----                                                      | -----               | -----                     | GTGCCGCTGAAGTCGCTGCTAATCGATGGGAACTGCAGGGTGGAGGATAGAGGGCTC  | AAAAACACATCATGGGCAA | ----- | ----- | ----- | ----- | ----- | ----- | ----- | ----- |
| APOSTART_13     | (112) | -----                               | -----                                                      | -----               | -----                     | GTGCCGCTGAAGTCGCTGCTAATCGATGGGAACTGCAGGGTGGAGGATAGAGGGCTC  | AAAAACACATCATGGGCAA | ----- | ----- | ----- | ----- | ----- | ----- | ----- | ----- |
| APOSTART_1_GEN  | (521) | GTCAAGTGTTTATTAAGACTTG-TGTACATACAG  | GTGCCGCTGAAGTCGCTGCTAATAGACGGGAACTGCAGGGTGGAGGATAGAGGGCTC  | AAAAACACATCATGGGCAA | GTGAGTCGGCTTTT---         | CCCTTTTC                                                   |                     |       |       |       |       |       |       |       |       |
| APOSTART_2_GEN  | (524) | GTCAAGTGTTTATTAAGACTTG-TGTACATACAG  | GTGCCGCTGAAGTCGCTGCTAATCGATGGGAACTGCAGGGTGGAGGATAGAGGGCTC  | AAAAACACATCATGGGCAA | GTGAGTCGGCTTTT---         | CCCTTTTC                                                   |                     |       |       |       |       |       |       |       |       |
| APOSTART_5_GEN  | (496) | ----AGTTTTTCATTAAGAAATG-TGTACATGCAG | GTGCCCTCTTAAGTCTCTGCTAATCGACGGGAACTGCAGGGTGGAGGACAGAGGACTC | AAAAACACATCATGGGCAA | GTGAGTTTGCTATTATTCTCTTTTC |                                                            |                     |       |       |       |       |       |       |       |       |
| APOSTART_6_GEN  | (442) | GC--AATTTTTCATTAAGAAATT-TGTACATGCAG | GTGCCCTCTTAAGTCGCTGCTAATCGACGGGAACTGCAGGGTGGAGGACAGAGGACTC | AAAAACACATCATGGGCAA | GTGAGTTTGCTATTATTCTCTTTTC |                                                            |                     |       |       |       |       |       |       |       |       |
| APOSTART_7_GEN  | (535) | GTTAAGTGTTTATTAAGACTTTCTATACATACAG  | GTGCCGCTGAAGTCGCTGCTAATCGATGGGAACTGCAGGGTGGAGGATAGAGGGCTC  | AAAAACACATCATGGGCAA | GTGAGTCTGCTTTT---         | CCCTTTTC                                                   |                     |       |       |       |       |       |       |       |       |
| APOSTART_8_GEN  | (521) | GTCAAGTGTTTATTAAGACTTG-TGTACATACAG  | GTGCCGCTGAAGTCGCTGCTAATAGACGGGAACTGCAGGGTGGAGGATAGAGGGCTC  | AAAAACACATCATGGGCAA | GTGAGTCGGCTTTT---         | CCCTTTTC                                                   |                     |       |       |       |       |       |       |       |       |
| APOSTART_10_GEN | (521) | GTCAAGTGTTTATTAAGACTTG-TGTACATACAG  | GTGCCGCTGAAGTCGCTGCTAATAGACGGGAACTGCAGGGTGGAGGATAGAGGGCTC  | AAAAACACATCATGGGCAA | GTGAGTCGGCTTTT---         | CCCTTTTC                                                   |                     |       |       |       |       |       |       |       |       |
| APOSTART_12_GEN | (529) | GTTAAGTGTTTATTAAGACTTTCTATACATACAG  | GTGCCGCTGAAGTCGCTGCTAATCGATGGGAACTGCAGGGTGGAGGATAGAGGGCTC  | AAAAACACATCATGGGCAA | GTGAGTCTGCTTTT---         | CCCTTTTC                                                   |                     |       |       |       |       |       |       |       |       |

|                 | (671) | 671                                                                                                                                      | 680   | 690   | 700   | 710   | 720   | 730   | 740   | 750   | 760   | 770   | 780   | 790   | 804   |
|-----------------|-------|------------------------------------------------------------------------------------------------------------------------------------------|-------|-------|-------|-------|-------|-------|-------|-------|-------|-------|-------|-------|-------|
| APOSTART_1      | (187) | -----                                                                                                                                    | ----- | ----- | ----- | ----- | ----- | ----- | ----- | ----- | ----- | ----- | ----- | ----- | ----- |
| APOSTART_2      | (187) | -----                                                                                                                                    | ----- | ----- | ----- | ----- | ----- | ----- | ----- | ----- | ----- | ----- | ----- | ----- | ----- |
| APOSTART_3      | (187) | -----                                                                                                                                    | ----- | ----- | ----- | ----- | ----- | ----- | ----- | ----- | ----- | ----- | ----- | ----- | ----- |
| APOSTART_4      | (187) | -----                                                                                                                                    | ----- | ----- | ----- | ----- | ----- | ----- | ----- | ----- | ----- | ----- | ----- | ----- | ----- |
| APOSTART_5      | (187) | -----                                                                                                                                    | ----- | ----- | ----- | ----- | ----- | ----- | ----- | ----- | ----- | ----- | ----- | ----- | ----- |
| APOSTART_6      | (187) | -----                                                                                                                                    | ----- | ----- | ----- | ----- | ----- | ----- | ----- | ----- | ----- | ----- | ----- | ----- | ----- |
| APOSTART_7      | (187) | -----                                                                                                                                    | ----- | ----- | ----- | ----- | ----- | ----- | ----- | ----- | ----- | ----- | ----- | ----- | ----- |
| APOSTART_8      | (187) | -----                                                                                                                                    | ----- | ----- | ----- | ----- | ----- | ----- | ----- | ----- | ----- | ----- | ----- | ----- | ----- |
| APOSTART_9      | (187) | -----                                                                                                                                    | ----- | ----- | ----- | ----- | ----- | ----- | ----- | ----- | ----- | ----- | ----- | ----- | ----- |
| APOSTART_10     | (187) | -----                                                                                                                                    | ----- | ----- | ----- | ----- | ----- | ----- | ----- | ----- | ----- | ----- | ----- | ----- | ----- |
| APOSTART_11     | (187) | -----                                                                                                                                    | ----- | ----- | ----- | ----- | ----- | ----- | ----- | ----- | ----- | ----- | ----- | ----- | ----- |
| APOSTART_12     | (187) | -----                                                                                                                                    | ----- | ----- | ----- | ----- | ----- | ----- | ----- | ----- | ----- | ----- | ----- | ----- | ----- |
| APOSTART_14     | (187) | -----                                                                                                                                    | ----- | ----- | ----- | ----- | ----- | ----- | ----- | ----- | ----- | ----- | ----- | ----- | ----- |
| APOSTART_15     | (187) | -----                                                                                                                                    | ----- | ----- | ----- | ----- | ----- | ----- | ----- | ----- | ----- | ----- | ----- | ----- | ----- |
| APOSTART_13     | (187) | -----                                                                                                                                    | ----- | ----- | ----- | ----- | ----- | ----- | ----- | ----- | ----- | ----- | ----- | ----- | ----- |
| APOSTART_1_GEN  | (651) | CGACAACACGAGCTTGCTCGCTGTTTCCTTGTTTTGCATTCTGAATGTTGGGCGTCGAATTATCATGATGAAGCTGTCGAACTGTAGATGTTACTATATACTACTACAAGAATCTTAGTAGATGTTGTATTTGCT  |       |       |       |       |       |       |       |       |       |       |       |       |       |
| APOSTART_2_GEN  | (654) | CACCAACACGAGCTTGCTCGCTGTTTCCTTGTTTTGCATTCTGAATGTTGGGCCTCAAATTATCTCGATGAAGCTGTCGAACTGTAGATGTTACTATATACAACCTACCAGAATCTTAGTACATGTTGTATTTGCT |       |       |       |       |       |       |       |       |       |       |       |       |       |
| APOSTART_5_GEN  | (625) | TGATAAGTGATAACACGACTAGTTTGCTTGCTGTTCCCTTTTTTATATATTTGTTTGGATTTCGAATGCCG-GGTGTTGAATGATCTTGATGAGGGTGTCCAACAGTA--GATATTACTGCATCCTAGAGCAGGA  |       |       |       |       |       |       |       |       |       |       |       |       |       |
| APOSTART_6_GEN  | (573) | CGATAACACGAG-TAGTATGCTCGCTGTTCCGTTTTTTATATATTTGTTTGGATTTCGAATAGTGGGTGTTGAATGATCTTGATGAGGGTGTGCAACTGT--A-----GATGTTACTGCATCCTAAAGCAGGA    |       |       |       |       |       |       |       |       |       |       |       |       |       |
| APOSTART_7_GEN  | (666) | CGACAACATGAGCTTGCTCACTGTTTCCTTGTTTTGCATTATGAATGTTGGGCATTGAATTATCTCGATGAAGCCGTCGAACTGTAGATGTTACTGTATCCCACTACAAGAATCTTAAGAGATGTTTATATTTGCA |       |       |       |       |       |       |       |       |       |       |       |       |       |
| APOSTART_8_GEN  | (651) | CGACAACACGAGCTTGCTCGCTGTTTCCTTGTTTTGCATTCTGAATGTTGGGCGTCGAATTATCATGATGAAGCTGTCGAACTGTAGATGTTACTATATACTACTACAAGAATCTTAGTAGATGTTGTATTTGCT  |       |       |       |       |       |       |       |       |       |       |       |       |       |
| APOSTART_10_GEN | (651) | CGACAACACGAGCTTGCTCGCTGTTTCCTTGTTTTGCATTCTGAATGTTGGGCGTCGAATTATCATGATGAAGCTGTCGAACTGTAGATGTTACTATATACTACTACAAGAATCTTAGTAGATGTTGTATTTGCT  |       |       |       |       |       |       |       |       |       |       |       |       |       |
| APOSTART_12_GEN | (660) | CGACAACATGAGCTTGCTCACTGTTTCCTTGTTTTGCATTATGAATGTTGGGCATTGAATTATCTCGATGAAGCCGTCGAACTGTAGATGTTACTGTATCCCACTACAAGAATCTTAAGAGATGTTTATATTTGCA |       |       |       |       |       |       |       |       |       |       |       |       |       |

|                 |       | Section 7                                                                                                                               |     |     |     |     |     |     |     |     |     |     |     |     |     |
|-----------------|-------|-----------------------------------------------------------------------------------------------------------------------------------------|-----|-----|-----|-----|-----|-----|-----|-----|-----|-----|-----|-----|-----|
|                 | (805) | 805                                                                                                                                     | 810 | 820 | 830 | 840 | 850 | 860 | 870 | 880 | 890 | 900 | 910 | 920 | 938 |
| APOSTART 1      | (187) | -----                                                                                                                                   |     |     |     |     |     |     |     |     |     |     |     |     |     |
| APOSTART 2      | (187) | -----                                                                                                                                   |     |     |     |     |     |     |     |     |     |     |     |     |     |
| APOSTART_3      | (187) | -----                                                                                                                                   |     |     |     |     |     |     |     |     |     |     |     |     |     |
| APOSTART_4      | (187) | -----                                                                                                                                   |     |     |     |     |     |     |     |     |     |     |     |     |     |
| APOSTART_5      | (187) | -----                                                                                                                                   |     |     |     |     |     |     |     |     |     |     |     |     |     |
| APOSTART_6      | (187) | -----                                                                                                                                   |     |     |     |     |     |     |     |     |     |     |     |     |     |
| APOSTART 7      | (187) | -----                                                                                                                                   |     |     |     |     |     |     |     |     |     |     |     |     |     |
| APOSTART_8      | (187) | -----                                                                                                                                   |     |     |     |     |     |     |     |     |     |     |     |     |     |
| APOSTART_9      | (187) | -----                                                                                                                                   |     |     |     |     |     |     |     |     |     |     |     |     |     |
| APOSTART_10     | (187) | -----                                                                                                                                   |     |     |     |     |     |     |     |     |     |     |     |     |     |
| APOSTART_11     | (187) | -----                                                                                                                                   |     |     |     |     |     |     |     |     |     |     |     |     |     |
| APOSTART_12     | (187) | -----                                                                                                                                   |     |     |     |     |     |     |     |     |     |     |     |     |     |
| APOSTART_14     | (187) | -----                                                                                                                                   |     |     |     |     |     |     |     |     |     |     |     |     |     |
| APOSTART_15     | (187) | -----                                                                                                                                   |     |     |     |     |     |     |     |     |     |     |     |     |     |
| APOSTART_13     | (187) | -----                                                                                                                                   |     |     |     |     |     |     |     |     |     |     |     |     |     |
| APOSTART_1_GEN  | (785) | CTTTAAAAAAAATAACGATTTCCTTAATTTATCTGTAGCTTAACCAAGAATTGTTCTCAGTCGTACTGCATTTGTTTGGAACAATTGTATATCCTACGATTCTGACAGTGTTAAATACTTAA-TCTTCCATGCA  |     |     |     |     |     |     |     |     |     |     |     |     |     |
| APOSTART_2_GEN  | (788) | CTTTTAAAAAAA--TACGATTTCCTTAATTTATCTGTAGCTTAACCAAAAATTGTTCTCAGTCGTACTGCATTTGTTTGGAACATTTGTATATCCTACGATTCTGACAGTGTTAAATACTTAA-TCTTCCATGCA |     |     |     |     |     |     |     |     |     |     |     |     |     |
| APOSTART_5_GEN  | (756) | ATCCTAATAGTTTCTGGTTTTCTTTTCATGTGAGAA-ATAATAGTTTTCTTCATTTATCCGTAGCTATCTTGATTTCAGAATTGTCCTCATTCGTATGATACTGACAGTATAGAATACTTAGTTCCCTCCATGCA |     |     |     |     |     |     |     |     |     |     |     |     |     |
| APOSTART_6_GEN  | (696) | ATCCTAATAGTTTTTGGTTTTCTCTTCTGCGAGAAATAATAGTTTTCTTCATTTATCGGTag--CTAGCTTGATTTCAGAActGTCCTCATTCCTATGATTCTGACAGTATAGAATACTTAGATCTTTTCATGCA |     |     |     |     |     |     |     |     |     |     |     |     |     |
| APOSTART_7_GEN  | (800) | CTTTAAAAGAAA-TACGATTTCCTAAATTGATCTGTAGCTTAACCAAGAATTGTTCTCAGTCGTACTGCATTTGTTTGGAACAATTATATATCCTACGATTCTGACAGTGTTAAATACTTAAATCTTCCATGCA  |     |     |     |     |     |     |     |     |     |     |     |     |     |
| APOSTART_8_GEN  | (785) | CTTTAAAAAAAATAACGATTTCCTTAATTTATCTGTAGCTTAACCAAGAATTGTTCTCAGTCGTACTGCATTTGTTTGGAACAATTGTATATCCTACGATTCTGACAGTGTTAAATACTTAA-TCTTCCATGCA  |     |     |     |     |     |     |     |     |     |     |     |     |     |
| APOSTART_10_GEN | (785) | CTTTAAAAAAAATAACGATTTCCTTAATTTATCTGTAGCTTAACCAAGAATTGTTCTCAGTCGTACTGCATTTGTTTGGAACAATTGTATATCCTACGATTCTGACAGTGTTAAATACTTAA-TCTTCCATGCA  |     |     |     |     |     |     |     |     |     |     |     |     |     |
| APOSTART_12_GEN | (794) | CTTTAAAAGAAA-TACGATTTCCTAAATTGATCTGTAGCTTAACCAAGAATTGTTCTCAGTCGTACTGCATTTGTTTGGAACAATTATATATCCTACGATTCTGACAGTGTTAAATACTTAAATCTTCCATGCA  |     |     |     |     |     |     |     |     |     |     |     |     |     |

|                 |       | Section 8                                                                                                                                  |     |     |     |     |     |      |      |      |      |      |      |      |      |
|-----------------|-------|--------------------------------------------------------------------------------------------------------------------------------------------|-----|-----|-----|-----|-----|------|------|------|------|------|------|------|------|
|                 | (939) | 939                                                                                                                                        | 950 | 960 | 970 | 980 | 990 | 1000 | 1010 | 1020 | 1030 | 1040 | 1050 | 1060 | 1072 |
| APOSTART 1      | (187) | -----                                                                                                                                      |     |     |     |     |     |      |      |      |      |      |      |      |      |
| APOSTART 2      | (187) | -----                                                                                                                                      |     |     |     |     |     |      |      |      |      |      |      |      |      |
| APOSTART_3      | (187) | -----                                                                                                                                      |     |     |     |     |     |      |      |      |      |      |      |      |      |
| APOSTART_4      | (187) | -----                                                                                                                                      |     |     |     |     |     |      |      |      |      |      |      |      |      |
| APOSTART_5      | (187) | -----                                                                                                                                      |     |     |     |     |     |      |      |      |      |      |      |      |      |
| APOSTART_6      | (187) | -----                                                                                                                                      |     |     |     |     |     |      |      |      |      |      |      |      |      |
| APOSTART 7      | (187) | -----                                                                                                                                      |     |     |     |     |     |      |      |      |      |      |      |      |      |
| APOSTART_8      | (187) | -----                                                                                                                                      |     |     |     |     |     |      |      |      |      |      |      |      |      |
| APOSTART_9      | (187) | -----                                                                                                                                      |     |     |     |     |     |      |      |      |      |      |      |      |      |
| APOSTART_10     | (187) | -----                                                                                                                                      |     |     |     |     |     |      |      |      |      |      |      |      |      |
| APOSTART_11     | (187) | -----                                                                                                                                      |     |     |     |     |     |      |      |      |      |      |      |      |      |
| APOSTART_12     | (187) | -----                                                                                                                                      |     |     |     |     |     |      |      |      |      |      |      |      |      |
| APOSTART_14     | (187) | -----                                                                                                                                      |     |     |     |     |     |      |      |      |      |      |      |      |      |
| APOSTART_15     | (187) | -----                                                                                                                                      |     |     |     |     |     |      |      |      |      |      |      |      |      |
| APOSTART_13     | (187) | -----                                                                                                                                      |     |     |     |     |     |      |      |      |      |      |      |      |      |
| APOSTART_1_GEN  | (918) | CACA-TTATGATCACTTCTTCAGAAACATTCA-GTGTcCTTTTTTTTTGGCAACATGAAGAGCTGATTTTTGTAAATGATCTATGTAGCTTATACATGCATT-TTTTCCATGATCACCGTAATTTTCTTACCCTTT   |     |     |     |     |     |      |      |      |      |      |      |      |      |
| APOSTART_2_GEN  | (919) | CACA-TTATGATCACTTCTTCAGAAACATTCA-GTGTcCTTTTATTTTGG--CA-----AC--ATGAAGAGCTTATACATGCATT-TTTTCCATGATCACCATAAATGTTCTTACCCTTT                   |     |     |     |     |     |      |      |      |      |      |      |      |      |
| APOSTART_5_GEN  | (889) | CACAGTTACGTCGACTTCTTCAGAAACATTCAAGTGTTc--TTTTTTGGTAAAAGGAGCATCTGATTTTTGTAAATGATCTATATG-----TA---GCTTA-----                                 |     |     |     |     |     |      |      |      |      |      |      |      |      |
| APOSTART_6_GEN  | (828) | CACCGTTATGTTGACTTCTTCAGAAATCATTCAAGTGTTcTTTTTTTTTAGGCAAAGGAAGAGCTGATTTTCGTAATGATCTATATGTAGCTTATTTATACAGTTTTCCGTGATCAGTATAATATTCTGCCCCCT    |     |     |     |     |     |      |      |      |      |      |      |      |      |
| APOSTART_7_GEN  | (933) | CACA-TTATGATCACTTCTTCAGAAACATTcAGTGTTc--TTTTTTTGGCAACATGAAGAGCTGATTTTTTTAAATGATCTATGTAGCTTATTCATGCATT-TTTTCCATGATCACCGTAATGTTCTTACCCTTT    |     |     |     |     |     |      |      |      |      |      |      |      |      |
| APOSTART_8_GEN  | (918) | CACA-TTATGATCACTTCTTCAGAAACATTCA-GTGTcCTTTTTTTTTTGGCAACATGAAGAGCTGATTTTTGTAAATGATCTATGTAGCTTATACATGCATT-TTTTCCATGATCACCGTAATTTTCTTACCCTTT  |     |     |     |     |     |      |      |      |      |      |      |      |      |
| APOSTART_10_GEN | (918) | CACA-TTATGATCACTTCTTCAGAAACATTCA-GTGTcCTTTTTTTTTTGGCAACATGAAGAGCTGATTTTTGTAAATGATCTATGTAGCTTATACATGCATT-TTTTCCATGATCACCGTAATTTTCTTACCCTTT  |     |     |     |     |     |      |      |      |      |      |      |      |      |
| APOSTART_12_GEN | (927) | CACA-TTATGATCACTTCTTCAGAAACATTCA-GTGTTCCTTTTTTTT-GGCAACATGAAGAGCTGATTTTTTTTAAATGATCTATGTAGCTTATTCATGCATT-TTTTCCATGATCACCGTAATGTTCTTACCCTTT |     |     |     |     |     |      |      |      |      |      |      |      |      |

|                 | (1073) | 1073                                                       | 1080                                                  | 1090                                              | 1100                             | 1110          | 1120    | 1130                                                  | 1140                                             | 1150                             | 1160     | 1170  | 1180  | 1190  | 1206  |
|-----------------|--------|------------------------------------------------------------|-------------------------------------------------------|---------------------------------------------------|----------------------------------|---------------|---------|-------------------------------------------------------|--------------------------------------------------|----------------------------------|----------|-------|-------|-------|-------|
| APOSTART_1      | (187)  | -----                                                      | -----                                                 | -----                                             | -----                            | -----         | -----   | ATGATTTATGTCCTGTGTGTTTATAACAAGAAAGAAAAGGAGCACCAAATCAC | -----                                            | -----                            | -----    | ----- | ----- | ----- | ----- |
| APOSTART_2      | (187)  | -----                                                      | -----                                                 | -----                                             | -----                            | -----         | -----   | ATGATTTATGTCCTGTGTGTTTATAACAAGAAAGAAAAGGAGCACCAAATCAC | -----                                            | -----                            | -----    | ----- | ----- | ----- | ----- |
| APOSTART_3      | (187)  | -----                                                      | -----                                                 | -----                                             | -----                            | -----         | -----   | ATGATTTATGTCCTGTGTGTTTATAACAAGAAAGAAAAGGAGCACCAAATCAC | -----                                            | -----                            | -----    | ----- | ----- | ----- | ----- |
| APOSTART_4      | (187)  | -----                                                      | -----                                                 | -----                                             | -----                            | -----         | -----   | ATGATTTATGTCCTGTGTGTTTATAACA                          | AAAGAAAAGGAGCACCAAATCAC                          | -----                            | -----    | ----- | ----- | ----- | ----- |
| APOSTART_5      | (187)  | -----                                                      | -----                                                 | -----                                             | -----                            | -----         | -----   | AGCA                                                  | CCAATCA                                          | CGGTTTGTCTAAAGCTGAGAGCCCTTCAACAC | TG--TCAC | ----- | ----- | ----- | ----- |
| APOSTART_6      | (187)  | -----                                                      | -----                                                 | -----                                             | -----                            | -----         | -----   | ATGAC                                                 | TTATGTCCTGTGCGTTTATAACAAGAAAGAAAAGGAGCACCAAATCAC | -----                            | -----    | ----- | ----- | ----- | ----- |
| APOSTART_7      | (187)  | -----                                                      | -----                                                 | -----                                             | -----                            | -----         | -----   | ATGATTTATGTCCTGTGTGTTTATAACAAGAAAGAAAAGGAGCACCAAATCAC | -----                                            | -----                            | -----    | ----- | ----- | ----- | ----- |
| APOSTART_8      | (187)  | -----                                                      | -----                                                 | -----                                             | -----                            | -----         | -----   | ATGATTTATGTCCTGTGTGTTTATAACAAGAAAGAAAAGGAGCACCAAATCAC | -----                                            | -----                            | -----    | ----- | ----- | ----- | ----- |
| APOSTART_9      | (187)  | -----                                                      | -----                                                 | -----                                             | -----                            | -----         | -----   | ATGATTTATGTCCTGTGTGTTTATAACAAGAAAGAAAAGGAGCACCAAATCAC | -----                                            | -----                            | -----    | ----- | ----- | ----- | ----- |
| APOSTART_10     | (187)  | -----                                                      | -----                                                 | -----                                             | -----                            | -----         | -----   | ATGATTTATGTCCTGTGTGTTTATAACAAGAAAGAAAAGGAGCACCAAATCAC | -----                                            | -----                            | -----    | ----- | ----- | ----- | ----- |
| APOSTART_11     | (187)  | -----                                                      | -----                                                 | -----                                             | -----                            | -----         | -----   | ATGATTTATGTCCTGTGTGTTTATAACAAGAAAGAAAAGGAGCACCAAATCAC | -----                                            | -----                            | -----    | ----- | ----- | ----- | ----- |
| APOSTART_12     | (187)  | -----                                                      | -----                                                 | -----                                             | -----                            | -----         | -----   | ATGATTTATGTCCTGTGTGTTTATAACAAGAAAGAAAAGGAGCACCAAATCAC | -----                                            | -----                            | -----    | ----- | ----- | ----- | ----- |
| APOSTART_14     | (187)  | -----                                                      | -----                                                 | -----                                             | -----                            | -----         | -----   | ATGATTTATGTCCTGTGTGTTTATAACA                          | AAAGAAAAGGAGCACCAAATCAC                          | -----                            | -----    | ----- | ----- | ----- | ----- |
| APOSTART_15     | (187)  | -----                                                      | -----                                                 | -----                                             | -----                            | -----         | -----   | ATGATTTATGTCCTGTGTGTTTATAACA                          | AAAGAAAAGGAGCACCAAATCAC                          | -----                            | -----    | ----- | ----- | ----- | ----- |
| APOSTART_13     | (187)  | -----                                                      | -----                                                 | -----                                             | -----                            | -----         | -----   | ATGATTTATGTCCTGTGTGTTTATAACAAGAAAGAAAAGGAGCACCAAATCAC | -----                                            | -----                            | -----    | ----- | ----- | ----- | ----- |
| APOSTART_1_GEN  | (1049) | ACATTTTTCATATATTTGCTTTTCTGTTCTCATCCCTCCTTTTCT--ATATTTTCAG  | ATGATTTATGTCCTGTGTGTTTATAACAAGAAAGAAAAGGAGCACCAAATCAC | G--GTTTGTTC                                       | TGAAGCTGAGAAC                    |               |         |                                                       |                                                  |                                  |          |       |       |       |       |
| APOSTART_2_GEN  | (1026) | ACATTTTCCTATATTTGCTTTTCTGTTCTCATCCCTCCTTTTCT--ATATTTTCAG   | ATGATTTATGTCCTGTGTGTTTATAACAAGAAAGAAAAGGAGCACCAAATCAC | G--GTTTGTTC                                       | TAAAGCTGAGAAC                    |               |         |                                                       |                                                  |                                  |          |       |       |       |       |
| APOSTART_5_GEN  | (979)  | ---TTTTGCTAAATTTCG-----GTTATCATCGGCTCTTTCC---ATCTTATCAG    | AGCA                                                  | CCAATCA                                           | CGGTTTGTCTAAAGCTGAGAGCCCTTCAACAC | TG--TCAC      | TTTGTTC | TAAAGCTGAGAGC                                         |                                                  |                                  |          |       |       |       |       |
| APOSTART_6_GEN  | (962)  | TACATTTTCTAAATTCA-----TTCTCATCCCTCTTT---CCATCTTATCAG       | ATGAC                                                 | TTATGTCCTGTGCGTTTATAACAAGAAAGAAAAGGAGCACCAAATCAC  | G--GTTTGTTC                      | TAAAGCTGAGAGC |         |                                                       |                                                  |                                  |          |       |       |       |       |
| APOSTART_7_GEN  | (1063) | ACATTTTCCTATATTTGCTTTTCTGTTCTCATCCCTCCTTTTCAC--TATTTTCAG   | ATGATTTATGTCCTGTGTGTTTATAACAAGAAAGAAAAGGAGCACCAAATCAC | G--GTTTGTTC                                       | TGAAGCTGAGAAC                    |               |         |                                                       |                                                  |                                  |          |       |       |       |       |
| APOSTART_8_GEN  | (1049) | ACATTTTTCATATATTTGCTTTTCTGTTCTCATCCCTCCTTTTCTTCCATCTTATCAG | ATGATTTATGTCCTGTGTGTTTATAACAAGAAAGAAAAGGAGCACCAAATCAC | G--GTTTGTTC                                       | TAAAGCTGAGAGC                    |               |         |                                                       |                                                  |                                  |          |       |       |       |       |
| APOSTART_10_GEN | (1049) | ACATTTTTCATATATTTGCTTTTCTGTTCTCATCCCTCCTTTTCT--ATATTTTCAG  | ATGATTTATGTCCTGTGTGTTTATAACAAGAAAGAAAAGGAGCACCAAATCAC | G--GTTTGTTC                                       | TGAAGCTGAGAAC                    |               |         |                                                       |                                                  |                                  |          |       |       |       |       |
| APOSTART_12_GEN | (1057) | ACATTTTCCTATATTTGCTTTTCTGTTCTCATCCCTCCTTTTCAC--TATTTTCAG   | ATGA                                                  | TTTATGTCCTGTGTGTTTATAACAAGAAAGAAAAGGAGCACCAAATCAC | G--GTTTGTTC                      | TGAAGCTGAGAAC |         |                                                       |                                                  |                                  |          |       |       |       |       |

|                 | (1207) | 1207                                                                 | 1220                                                                | 1230  | 1240  | 1250  | 1260  | 1270  | 1280                                                                | 1290  | 1300  | 1310  | 1320  | 1330  | 1340  |
|-----------------|--------|----------------------------------------------------------------------|---------------------------------------------------------------------|-------|-------|-------|-------|-------|---------------------------------------------------------------------|-------|-------|-------|-------|-------|-------|
| APOSTART_1      | (240)  | -----                                                                | -----                                                               | ----- | ----- | ----- | ----- | ----- | GATGGGTGCATATGACATTGAAGATGCGCTGGCTTGAAAAAAGAAGATAGAGCAGATCATCGATCAG | ----- | ----- | ----- | ----- | ----- | ----- |
| APOSTART_2      | (240)  | -----                                                                | -----                                                               | ----- | ----- | ----- | ----- | ----- | GATGGGTGCATATGACATTGAAGATGCGCTGGCTTGAAAAAAGAAGATAGAGCAGATCATCGATCAG | ----- | ----- | ----- | ----- | ----- | ----- |
| APOSTART_3      | (240)  | -----                                                                | -----                                                               | ----- | ----- | ----- | ----- | ----- | GATGGGTGCATATGACATTGAAGATGCGCTGGCTTGAAAAAAGAAGATAGAGCAGATCATCGATCAG | ----- | ----- | ----- | ----- | ----- | ----- |
| APOSTART_4      | (240)  | -----                                                                | -----                                                               | ----- | ----- | ----- | ----- | ----- | GATGGGTGCATATGACATTGAAGATGCGCTGGCTTGAAAAAAGAAGATAGAGCAGATCATCGATCAG | ----- | ----- | ----- | ----- | ----- | ----- |
| APOSTART_5      | (238)  | -----                                                                | -----                                                               | ----- | TT    | ----- | ----- | ----- | TATGGGTGCATACGACATTGAAGATGCTCTGGCTTGAAAAAAGAAGATAGAGCAGATCATCGATCAG | ----- | ----- | ----- | ----- | ----- | ----- |
| APOSTART_6      | (240)  | -----                                                                | -----                                                               | ----- | ----- | ----- | ----- | ----- | GATGGGTGCATATGACATTGAAGATGCTCTAGCTTGAAAAAAGAAGATAGAGCAGATCATCGATCAG | ----- | ----- | ----- | ----- | ----- | ----- |
| APOSTART_7      | (240)  | -----                                                                | -----                                                               | ----- | ----- | ----- | ----- | ----- | GATGGGTGCATATGACATTGAAGATGCTCTGGCTTGAAAAAAGAAGATAGAACAGATCATCGATCAG | ----- | ----- | ----- | ----- | ----- | ----- |
| APOSTART_8      | (240)  | -----                                                                | -----                                                               | ----- | ----- | ----- | ----- | ----- | GATGGGTGCATATGACATTGAAGATGCGCTGGCTTGAAAAAAGAAGATAGAGCAGATCATCGATCAG | ----- | ----- | ----- | ----- | ----- | ----- |
| APOSTART_9      | (240)  | -----                                                                | -----                                                               | ----- | ----- | ----- | ----- | ----- | GATGGGTGCATATGACATTGAAGATGCGCTGGCTTGAAAAAAGAAGATAGAGCAGATCATCGATCAG | ----- | ----- | ----- | ----- | ----- | ----- |
| APOSTART_10     | (240)  | -----                                                                | -----                                                               | ----- | ----- | ----- | ----- | ----- | GATGGGTGCATATGACATTGAAGATGCGCTGGCTTGAAAAAAGAAGATAGAGCAGATCATCGATCAG | ----- | ----- | ----- | ----- | ----- | ----- |
| APOSTART_11     | (240)  | -----                                                                | -----                                                               | ----- | ----- | ----- | ----- | ----- | GATGGGTGCATATGACATTGAAGATGCGCTGGCTTGAAAAAAGAAGATAGAGCAGATCATCGATCAG | ----- | ----- | ----- | ----- | ----- | ----- |
| APOSTART_12     | (240)  | -----                                                                | -----                                                               | ----- | ----- | ----- | ----- | ----- | GATGGGTGCATATGACATTGAAGATGCGCTGGCTTGAAAAAAGAAGATAGAGCAGATCATCGATCAG | ----- | ----- | ----- | ----- | ----- | ----- |
| APOSTART_14     | (240)  | -----                                                                | -----                                                               | ----- | ----- | ----- | ----- | ----- | GATGGGTGCATATGACATTGAAGATGCGCTGGCTTGAAAAAAGAAGATAGAGCAGATCATCGATCAG | ----- | ----- | ----- | ----- | ----- | ----- |
| APOSTART_15     | (240)  | -----                                                                | -----                                                               | ----- | ----- | ----- | ----- | ----- | GATGGGTGCATATGACATTGAAGATGCGCTGGCTTGAAAAAAGAAGATAGAGCAGATCATCGATCAG | ----- | ----- | ----- | ----- | ----- | ----- |
| APOSTART_13     | (240)  | -----                                                                | -----                                                               | ----- | ----- | ----- | ----- | ----- | GATGGGTGCATATGACATTGAAGATGCGCTGGCTTGAAAAAAGAAGATAGAGCAGATCATCGATCAG | ----- | ----- | ----- | ----- | ----- | ----- |
| APOSTART_1_GEN  | (1178) | CCAC-----ACTATCACTTTTTGTTTCATTCAAATTTATGCCATA-ATTAATTTTCATTCTCA      | GATGGGTGCATATGACATTGAAGATGCGCTGGCTTGAAAAAAGAAGATAGAGCAGATCATCGATCAG | G     |       |       |       |       |                                                                     |       |       |       |       |       |       |
| APOSTART_2_GEN  | (1155) | CCA-C-----ACTATCACTTTTTGTTTCATTCAAATTTATGCCATA-ATTAATTTTCATTCTCA     | GATGGGTGCATATGACATTGAAGATGCGCTGGCTTGAAAAAAGAAGATAGAGCAGATCATCGATCAG | G     |       |       |       |       |                                                                     |       |       |       |       |       |       |
| APOSTART_5_GEN  | (1097) | CCTTCAACACTGTCACCTTTGTTTCGTTATGTCATTACATTTATGCCCTAGATAAAATTTAATGCTCA | GATGGGTGCATACGACATTGAAGATGCTCTGGCTTGAAAAAAGAAGATAGAGCAGATCATCGATCAG | G     |       |       |       |       |                                                                     |       |       |       |       |       |       |
| APOSTART_6_GEN  | (1081) | CCTTCAACACTGTCACCTTTGTTTCGTTATGTCATTACATTTATGCCCTAGATAAAATTTAATGCTCA | GATGGGTGCATATGACATTGAAGATGCTCTAGCTTGAAAAAAGAAGATAGAGCAGATCATCGATCAG | G     |       |       |       |       |                                                                     |       |       |       |       |       |       |
| APOSTART_7_GEN  | (1192) | CCACA-----CTATCAGTTTTTGTTCATTGGATGTATGCCATA-ATTAATTTTCATTCTCA        | GATGGGTGCATATGACATTGAAGATGCTCTGGCTTGAAAAAAGAAGATAGAACAGATCATCGATCAG | G     |       |       |       |       |                                                                     |       |       |       |       |       |       |
| APOSTART_8_GEN  | (1181) | CCTTCAACACTGTCACCTTTGTTTCGTTATGTCATTACATTTATGCCCTAGATTAATTTTCATTCTCA | GATGGGTGCATATGACATTGAAGATGCGCTGGCTTGAAAAAAGAAGATAGAGCAGATCATCGATCAG | G     |       |       |       |       |                                                                     |       |       |       |       |       |       |
| APOSTART_10_GEN | (1178) | CCA-----CACTATCACTTTTTGTTTCATTCAAATTTATGCCATAATTAATTTTCATTCTCA       | GATGGGTGCATATGACATTGAAGATGCGCTGGCTTGAAAAAAGAAGATAGAGCAGATCATCGATCAG | G     |       |       |       |       |                                                                     |       |       |       |       |       |       |
| APOSTART_12_GEN | (1186) | CCA-----CACTATCAGTTTTTGTTCATTGGATGTATGCCATAATTAATTTTCATTCTCA         | GATGGGTGCATATGACATTGAAGATGCGCTGGCTTGAAAAAAGAAGATAGAGCAGATCATCGATCAG | G     |       |       |       |       |                                                                     |       |       |       |       |       |       |

|                 |        |                                                                                                                                          |      |      |      |      |      |      |      |      |      |      |      |      | Section 11 |
|-----------------|--------|------------------------------------------------------------------------------------------------------------------------------------------|------|------|------|------|------|------|------|------|------|------|------|------|------------|
|                 | (1341) | 1341                                                                                                                                     | 1350 | 1360 | 1370 | 1380 | 1390 | 1400 | 1410 | 1420 | 1430 | 1440 | 1450 | 1460 | 1474       |
| APOSTART 1      | (307)  | -----                                                                                                                                    |      |      |      |      |      |      |      |      |      |      |      |      |            |
| APOSTART 2      | (307)  | -----                                                                                                                                    |      |      |      |      |      |      |      |      |      |      |      |      |            |
| APOSTART_3      | (307)  | -----                                                                                                                                    |      |      |      |      |      |      |      |      |      |      |      |      |            |
| APOSTART_4      | (307)  | -----                                                                                                                                    |      |      |      |      |      |      |      |      |      |      |      |      |            |
| APOSTART_5      | (307)  | -----                                                                                                                                    |      |      |      |      |      |      |      |      |      |      |      |      |            |
| APOSTART_6      | (307)  | -----                                                                                                                                    |      |      |      |      |      |      |      |      |      |      |      |      |            |
| APOSTART 7      | (307)  | -----                                                                                                                                    |      |      |      |      |      |      |      |      |      |      |      |      |            |
| APOSTART_8      | (307)  | -----                                                                                                                                    |      |      |      |      |      |      |      |      |      |      |      |      |            |
| APOSTART_9      | (307)  | -----                                                                                                                                    |      |      |      |      |      |      |      |      |      |      |      |      |            |
| APOSTART_10     | (307)  | -----                                                                                                                                    |      |      |      |      |      |      |      |      |      |      |      |      |            |
| APOSTART_11     | (307)  | -----                                                                                                                                    |      |      |      |      |      |      |      |      |      |      |      |      |            |
| APOSTART_12     | (307)  | -----                                                                                                                                    |      |      |      |      |      |      |      |      |      |      |      |      |            |
| APOSTART_14     | (307)  | -----                                                                                                                                    |      |      |      |      |      |      |      |      |      |      |      |      |            |
| APOSTART_15     | (307)  | -----                                                                                                                                    |      |      |      |      |      |      |      |      |      |      |      |      |            |
| APOSTART_13     | (307)  | -----                                                                                                                                    |      |      |      |      |      |      |      |      |      |      |      |      |            |
| APOSTART_1_GEN  | (1302) | TGCAGTAATG-ATTTGCTTCAGCGGAACTTGT-CAACAGTAAAATAATTTTAAATAAGATATCTGAGAGATGCTCAAATACG----AGGCATTTTATGTTCCATTTATTTTCATGTTGGGTCCTGAAATAATCCC  |      |      |      |      |      |      |      |      |      |      |      |      |            |
| APOSTART_2_GEN  | (1279) | TGCAGTAAGG-ATTTGCTTCAGCGGAACTTGT-CAACAGTAAAATAATTGTAAATAAGATATCTGAGAGATGCTCAAAT---C-GAGGCGTTTATGTTCCATTTATTTTCATGTTGGGTCCTGAAATAATCCC    |      |      |      |      |      |      |      |      |      |      |      |      |            |
| APOSTART_5_GEN  | (1231) | TGCAGTAAGG-ATTAGCTTCAGTGGAACCTTGT-----ACAACAGTAACACTTTTAA-----CTTACATCCCTGAAAAATGCT-----AAAAAAAAAA                                       |      |      |      |      |      |      |      |      |      |      |      |      |            |
| APOSTART_6_GEN  | (1215) | TGCAGTAAGG-ATTAGCTTCAGTGGAACCTTGT-----ACAACAGTAACACTTTTAAAGTTTAACTTACATCCCTGAGAAAATGCT-----AAAAAAAT                                      |      |      |      |      |      |      |      |      |      |      |      |      |            |
| APOSTART_7_GEN  | (1316) | TGCAGTAAGGGATTTTCTTCAGTGTAACCTTGTACAACAGCAACACTTTCAAATAACATATATACTTGAAAATGCTAAAAAAAAAAATGAGGCATTTGTGTCCCATTTATTTTCGTCTTCATCGTGAAATAATCGT |      |      |      |      |      |      |      |      |      |      |      |      |            |
| APOSTART_8_GEN  | (1315) | TGCAGTAATG-ATTTGCTTCAGCGGAACTTGT-CAACTACTTCGTGCTCGAGGGCAAGCTGCTCGCCTACTACAAGAAGAAGCCCAAGGACAGCATGGTGCCGCTGAAGTCATGTTGGGTCCTGAAATAATCCC   |      |      |      |      |      |      |      |      |      |      |      |      |            |
| APOSTART_10_GEN | (1302) | TGCAGTAATG-ATTTGCTTCAGCGGAACTTGT-CAACAGTAAAATAATTTTAAATAAGATATCTGAGAGATGCTCAAATACG----AGGCATTTTATGTTCCATTTATTTTCATGTTGGGTCCTGAAATAATCCC  |      |      |      |      |      |      |      |      |      |      |      |      |            |
| APOSTART_12_GEN | (1310) | TGCAGTAATG-ATTTGCTTCAGCGGAACTTGT-CAACAGTAAAATAATTTTAAATAAGATATCTGAGAGATGCTCAAATACG----AGGCATTTTATGTTCCATTTATTTTCATGTTGGGTCCTGAAATAATCCC  |      |      |      |      |      |      |      |      |      |      |      |      |            |
| Section 11      |        |                                                                                                                                          |      |      |      |      |      |      |      |      |      |      |      |      |            |

|                 |        |                                                                                                                                             |      |      |      |      |      |      |      |      |      |      |      |      | Section 12 |
|-----------------|--------|---------------------------------------------------------------------------------------------------------------------------------------------|------|------|------|------|------|------|------|------|------|------|------|------|------------|
|                 | (1475) | 1475                                                                                                                                        | 1480 | 1490 | 1500 | 1510 | 1520 | 1530 | 1540 | 1550 | 1560 | 1570 | 1580 | 1590 | 1608       |
| APOSTART 1      | (307)  | -----                                                                                                                                       |      |      |      |      |      |      |      |      |      |      |      |      |            |
| APOSTART 2      | (307)  | -----                                                                                                                                       |      |      |      |      |      |      |      |      |      |      |      |      |            |
| APOSTART_3      | (307)  | -----                                                                                                                                       |      |      |      |      |      |      |      |      |      |      |      |      |            |
| APOSTART_4      | (307)  | -----                                                                                                                                       |      |      |      |      |      |      |      |      |      |      |      |      |            |
| APOSTART_5      | (307)  | -----                                                                                                                                       |      |      |      |      |      |      |      |      |      |      |      |      |            |
| APOSTART_6      | (307)  | -----                                                                                                                                       |      |      |      |      |      |      |      |      |      |      |      |      |            |
| APOSTART 7      | (307)  | -----                                                                                                                                       |      |      |      |      |      |      |      |      |      |      |      |      |            |
| APOSTART_8      | (307)  | -----                                                                                                                                       |      |      |      |      |      |      |      |      |      |      |      |      |            |
| APOSTART_9      | (307)  | -----                                                                                                                                       |      |      |      |      |      |      |      |      |      |      |      |      |            |
| APOSTART_10     | (307)  | -----                                                                                                                                       |      |      |      |      |      |      |      |      |      |      |      |      |            |
| APOSTART_11     | (307)  | -----                                                                                                                                       |      |      |      |      |      |      |      |      |      |      |      |      |            |
| APOSTART_12     | (307)  | -----                                                                                                                                       |      |      |      |      |      |      |      |      |      |      |      |      |            |
| APOSTART_14     | (307)  | -----                                                                                                                                       |      |      |      |      |      |      |      |      |      |      |      |      |            |
| APOSTART_15     | (307)  | -----                                                                                                                                       |      |      |      |      |      |      |      |      |      |      |      |      |            |
| APOSTART_13     | (307)  | -----                                                                                                                                       |      |      |      |      |      |      |      |      |      |      |      |      |            |
| APOSTART_1_GEN  | (1429) | ATAGTTTGACAATTAAACACTAGAAATGTATTGATGTACGATAAAATCCTAGTGGTAGGACTAGCTGAAATAGTTTGGACTGTGTAGTGAATTTTATAAAAATTAATGG-AAAGCTCTCCATGTTGTTTCTGTTCGGA  |      |      |      |      |      |      |      |      |      |      |      |      |            |
| APOSTART_2_GEN  | (1406) | ATAGTTTGACAATTAAACACTAGAAATGTATTGATGTATGATAAAATCCTAGTGGTAGGACTAGCTGAAATAGTTTGGACTGTGTAGTGAATTATATAAAAATTAGTGG-AAAACCTCTCCATGTTGTTTCTGTTCAGA |      |      |      |      |      |      |      |      |      |      |      |      |            |
| APOSTART_5_GEN  | (1312) | TGAGTTTGACAATTACACTGCAGGAAATCTTGATATACGATAAAATCCTAGTGGTAGGACTAGTTGAAATGATCTGGATCATGTAGTGAATTTCTATAGGATTAATGGGAAAATTCTCCATGTTGTTTCTGTCAAA    |      |      |      |      |      |      |      |      |      |      |      |      |            |
| APOSTART_6_GEN  | (1303) | ATGAGTTGACAATTACACTGCAGGAAATCTTGATATACGATAAAATCCTAGTGGTAGGACTAGTTGAAATGATCTGGATCATGTAGTGAATTTCTATAGGATTAATGGGAAAATTCTCCATGTTGTTTCTTTCAAA    |      |      |      |      |      |      |      |      |      |      |      |      |            |
| APOSTART_7_GEN  | (1450) | ATAGTTTGACAATTACACAGCAGGAACTCTTGATATACGATAAA-----GTGGTAGGACTAATTGAAATAATATGGATCATGTAGTGAATTTTA--AATCTAATAGTATAACTCTCCATGTTATTTCTATCAAA      |      |      |      |      |      |      |      |      |      |      |      |      |            |
| APOSTART_8_GEN  | (1447) | ATAGTTTGACAATTAAACACTAGAAATGTATTGATGTACGATAAAATCCTAGTGGTAGGACTAGCTGAAATAGTTTGGACTGTGTAGTGAATTTTATAAAAATTAATGG-AAAGCTCTCCATGTTGTTTCTGTTCGGA  |      |      |      |      |      |      |      |      |      |      |      |      |            |
| APOSTART_10_GEN | (1429) | ATAGTTTGACAATTAAACACTAGAAATGTATTGATGTACGATAAAATCCTAGTGGTAGGACTAGCTGAAATAGTTTGGACTGTGTAGTGAATTTTATAAAAATTAATGG-AAAGCTCTCCATGTTGTTTCTGTTCGGA  |      |      |      |      |      |      |      |      |      |      |      |      |            |
| APOSTART_12_GEN | (1437) | ATAGTTTGACAATTAAACACTAGAAATGTATTGATGTACGATAAAATCCTAGTGGTAGGACTAGCTGAAATAGTTTGGACTGTGTAGTGAATTTTATAAAAATTAATGG-AAAGCTCTCCATGTTGTTTCTATCAAA   |      |      |      |      |      |      |      |      |      |      |      |      |            |



|                 |        | (1609)                    | 1609   | 1620  | 1630   | 1640     | 1650     | 1660   | 1670           | 1680                                | 1690                  | 1700                                | 1710                                | 1720                  | 1730                 | 1742   |        |
|-----------------|--------|---------------------------|--------|-------|--------|----------|----------|--------|----------------|-------------------------------------|-----------------------|-------------------------------------|-------------------------------------|-----------------------|----------------------|--------|--------|
| APOSTART_1      | (307)  | -----                     | -----  | ----- | -----  | CAGGACAC | TATGAC   | AGCTG  | AAAAACCG       | C                                   | AAAGCCTTTGCTTC        | AATGGACTTCGATGCGGAACTTGGAGGGCAGTTCT | CATTCTCAGATCATGACAGCG               | CG                    | -----                | -----  |        |
| APOSTART_2      | (307)  | -----                     | -----  | ----- | -----  | CAGGACAT | TATGAC   | AGCTA  | AAAAACCG       | C                                   | AAAGCCTTTGCTTC        | AATGGACTTCGATGCGGAACTTGGAGGGCAGTTCT | CATTCTCAGATCATGACAGCG               | CG                    | -----                | -----  |        |
| APOSTART_3      | (307)  | -----                     | -----  | ----- | -----  | CAGGACAC | TATGAC   | AGCTG  | AAAAACCG       | C                                   | AAAGCCTTTGCTTC        | AATGGACTTCGATGCGGAACTTGGAGGGCAGTTCT | CATTCTCAGATCATGACAGCG               | CG                    | -----                | -----  |        |
| APOSTART_4      | (307)  | -----                     | -----  | ----- | -----  | CAGCAG   | GACAC    | TATGAC | AGCTA          | AAAAACCG                            | G                     | AAAGCCTTTGCTTC                      | GATGGACTTCGATGCGGAACTTGGAGGGCAGTTCT | CATTCTCAGATCATGACAGCG | C                    | T----- |        |
| APOSTART_5      | (307)  | -----                     | -----  | ----- | -----  | CAGGACAC | TATGAC   | AGCTA  | AAAAACCG       | C                                   | AAAGCCTTTGCTTC        | AATGGACTTCGATGCGGAACTTGGAGGGCAGTTCT | CATTCTCAGATCATGACAGCG               | GG                    | -----                | -----  |        |
| APOSTART_6      | (307)  | -----                     | -----  | ----- | -----  | CAGGACAC | TATGAC   | AGCTA  | AAAAACCG       | C                                   | AAAGCCTTTGCTTC        | AATGGACTTCGATGCGGAACTTGGAGGGCAGTTCT | CATTCTCAGATCATGACAGCG               | GG                    | -----                | -----  |        |
| APOSTART_7      | (307)  | -----                     | -----  | ----- | -----  | CAGCAG   | GACAC    | TATGAC | TGCTA          | AAAAACCG                            | C                     | AAAGCCTTTGCTTC                      | AATGGACTTCGATGCGGAACTTGGAGGGCAGTTCT | CATTCTCAGATCATGACAGCG | CG                   | -----  |        |
| APOSTART_8      | (307)  | -----                     | -----  | ----- | -----  | CAGCAG   | GACAC    | TATGAC | AGCTG          | AAAAACCG                            | C                     | AAAGCCTTTGCTTC                      | AATGGACTTCGATGCGGAACTTGGAGGGCAGTTCT | CATTCTCAGATCATGACAGCG | CG                   | -----  |        |
| APOSTART_9      | (307)  | -----                     | -----  | ----- | -----  | CAGGACAC | TATGAC   | AGCTG  | AAAAACCG       | C                                   | AAAGCCTTTGCTTC        | AATGGACTTCGATGCGGAACTTGGAGGGCAGTTCT | CATTCTCAGATCATGACAGCG               | CG                    | -----                | -----  |        |
| APOSTART_10     | (307)  | -----                     | -----  | ----- | -----  | CAGCAG   | GACAC    | TATGAC | AGCTG          | AAAAACCG                            | C                     | AAAGCCTTTGCTTC                      | AATGGACTTCGATGCGGAACTTGGAGGGCAGTTCT | CATTCTCAGATCATGACAGCG | CG                   | -----  |        |
| APOSTART_11     | (307)  | -----                     | -----  | ----- | -----  | -----    | GACAC    | TATGAC | AGCTG          | AAAAACCG                            | C                     | AAAGCCTTTGCTTC                      | AATGGACTTCGATGCGGAACTTGGAGGGCAGTTCT | CATTCTCAGATCATGACAGCG | CG                   | -----  |        |
| APOSTART_12     | (307)  | -----                     | -----  | ----- | -----  | CAGCAG   | GACAC    | TATGAC | AGCTA          | AAAAACCG                            | C                     | AAAGCCTTTGCTTC                      | GATGGACTTCGATGCGGAACTTGGAGGGCAGTTCT | T                     | ATTCTCAGATCATGACAGCG | C      | T----- |
| APOSTART_14     | (307)  | -----                     | -----  | ----- | -----  | CAGGACAC | TATGAC   | AGCTA  | AAAAACCG       | G                                   | AAAGCCTTTGCTTC        | GATGGACTTCGATGCGGAACTTGGAGGGCAGTTCT | CATTCTCAGATCATGACAGCG               | C                     | T-----               | -----  |        |
| APOSTART_15     | (307)  | -----                     | -----  | ----- | -----  | -----    | GACAC    | TATGAC | AGCTA          | AAAAACCG                            | G                     | AAAGCCTTTGCTTC                      | GATGGACTTCGATGCGGAACTTGGAGGGCAGTTCT | CATTCTCAGATCATGACAGCG | C                    | T----- |        |
| APOSTART_13     | (307)  | -----                     | -----  | ----- | -----  | CAGGACAC | TATGAC   | AGCTA  | AAAAACCG       | C                                   | AAAGCCTTTGCTTC        | GATGGACTTCGATGCGGAACTTGGAGGGCAGTTCT | CATTCTCAGATCATGACAGCG               | C                     | T-----               | -----  |        |
| APOSTART_1_GEN  | (1562) | TATCACATCTCTACATTCTTGCGAG | CAGCAG | GACAC | TATGAC | AGCTG    | AAAAACCG | C      | AAAGCCTTTGCTTC | AATGGACTTCGATGCGGAACTTGGAGGGCAGTTCT | CATTCTCAGATCATGACAGCG | CG                                  | TATGTGAC                            |                       |                      |        |        |
| APOSTART_2_GEN  | (1539) | TATCACATCTCTACATTCTTGCGAG | CAGCAG | GACAT | TATGAC | AGCTA    | AAAAACCG | C      | AAAGCCTTTGCTTC | AATGGACTTCGATGCGGAACTTGGAGGGCAGTTCT | CATTCTCAGATCATGACAGCG | CG                                  | TATGTGAC                            |                       |                      |        |        |
| APOSTART_5_GEN  | (1446) | TATCACATATCTACATTCTTGCGAG | CAGCAG | GACAC | TATGAC | AGCTA    | AAAAACCG | C      | AAAGCCTTTGCTTC | AATGGACTTCGATGCGGAACTTGGAGGGCAGTTCT | CATTCTCAGATCATGACAGCG | GG                                  | TATGTAAT                            |                       |                      |        |        |
| APOSTART_6_GEN  | (1437) | TATCACATATCTACATTCTTGCGAG | CAGCAG | GACAC | TATGAC | AGCTA    | AAAAACCG | C      | AAAGCCTTTGCTTC | AATGGACTTCGATGCGGAACTTGGAGGGCAGTTCT | CATTCTCAGATCATGACAGCG | GG                                  | TATGTAAT                            |                       |                      |        |        |
| APOSTART_7_GEN  | (1577) | TATCACGTCTCTACATTCTTGCGAG | CAGCAG | GACAC | TATGAC | TGCTA    | AAAAACCG | C      | AAAGCCTTTGCTTC | AATGGACTTCGATGCGGAACTTGGAGGGCAGTTCT | CATTCTCAGATCATGACAGCG | CG                                  | TATGTGAC                            |                       |                      |        |        |
| APOSTART_8_GEN  | (1580) | TATCACATCTCTACATTCTTGCGAG | CAGCAG | GACAC | TATGAC | AGCTG    | AAAAACCG | C      | AAAGCCTTTGCTTC | AATGGACTTCGATGCGGAACTTGGAGGGCAGTTCT | CATTCTCAGATCATGACAGCG | CG                                  | TATGTGAC                            |                       |                      |        |        |
| APOSTART_10_GEN | (1562) | TATCACATCTCTACATTCTTGCGAG | CAGCAG | GACAC | TATGAC | AGCTG    | AAAAACCG | C      | AAAGCCTTTGCTTC | AATGGACTTCGATGCGGAACTTGGAGGGCAGTTCT | CATTCTCAGATCATGACAGCG | CG                                  | TATGTGAC                            |                       |                      |        |        |
| APOSTART_12_GEN | (1570) | TATCACGTCTCTACATTCTTGCGAG | CAGCAG | GACAC | TATGAC | AGCTA    | AAAAACCG | C      | AAAGCCTTTGCTTC | GATGGACTTCGATGCGGAACTTGGAGGGCAGTTCT | T                     | ATTCTCAGATCATGACAGCG                | CG                                  | TATGTGAC              |                      |        |        |

|                 | (1743) | 1743                                                                     | 1750                              | 1760       | 1770             | 1780   | 1790  | 1800  | 1810  | 1820                              | 1830       | 1840             | 1850  | 1860  | 1876  |
|-----------------|--------|--------------------------------------------------------------------------|-----------------------------------|------------|------------------|--------|-------|-------|-------|-----------------------------------|------------|------------------|-------|-------|-------|
| APOSTART_1      | (406)  | -----                                                                    | -----                             | -----      | -----            | -----  | ----- | ----- | ----- | GCTGAGGACGAAGAAAGAGCGGCCCACTTTGAC | CGTAGGACA  | AACTATAGGAAACGGT | ----- | ----- | ----- |
| APOSTART_2      | (406)  | -----                                                                    | -----                             | -----      | -----            | -----  | ----- | ----- | ----- | GCTGAGGACGAAGAAAGAGCGGCCCACTTTGAC | CGTAGGACA  | AACTATAGGAAACGGT | ----- | ----- | ----- |
| APOSTART_3      | (406)  | -----                                                                    | -----                             | -----      | -----            | -----  | ----- | ----- | ----- | GCTGAGGACGAAGAAAGAGCGGCCCACTTTGAC | CGTAGGACA  | AACTATAGGAAACGGT | ----- | ----- | ----- |
| APOSTART_4      | (409)  | -----                                                                    | -----                             | -----      | -----            | -----  | ----- | ----- | ----- | GCCGAGGACGAAGAGGAGCGACCACTTTGAC   | CGTAGGACA  | AACTATAGGAAACGGT | ----- | ----- | ----- |
| APOSTART_5      | (406)  | -----                                                                    | -----                             | -----      | -----            | -----  | ----- | ----- | ----- | GCTGAAAGACGAAGAGGAACGGCCGACTTTGAC | ACGTAGGACA | AACTATAGGAAACGGT | ----- | ----- | ----- |
| APOSTART_6      | (406)  | -----                                                                    | -----                             | -----      | -----            | -----  | ----- | ----- | ----- | GCTGAAAGACGAAGAGGAACGGCCGACTTTGAC | ACGTAGGACA | AACTATAGGAAACGGT | ----- | ----- | ----- |
| APOSTART_7      | (409)  | -----                                                                    | -----                             | -----      | -----            | -----  | ----- | ----- | ----- | GCTGAAAGACGAAGAAAGAGCGACCACTTTGAC | CGTAGGACA  | AACTATAGGAAACGGT | ----- | ----- | ----- |
| APOSTART_8      | (409)  | -----                                                                    | -----                             | -----      | -----            | -----  | ----- | ----- | ----- | GCTGAGGACGAAGAAAGAGCGGCCCACTTTGAC | CGTAGGACA  | AACTATAGGAAACGGT | ----- | ----- | ----- |
| APOSTART_9      | (406)  | -----                                                                    | -----                             | -----      | -----            | -----  | ----- | ----- | ----- | GCTGAGGACGAAGAAAGAGCGGCCCACTTTGAC | CGTAGGACA  | AACTATAGGAAACGGT | ----- | ----- | ----- |
| APOSTART_10     | (409)  | -----                                                                    | -----                             | -----      | -----            | -----  | ----- | ----- | ----- | GCTGAGGACGAAGAAAGAGCGGCCCACTTTGAC | CGTAGGACA  | AACTATAGGAAACGGT | ----- | ----- | ----- |
| APOSTART_11     | (403)  | -----                                                                    | -----                             | -----      | -----            | -----  | ----- | ----- | ----- | GCTGAGGACGAAGAAAGAGCGGCCCACTTTGAC | CGTAGGACA  | AACTATAGGAAACGGT | ----- | ----- | ----- |
| APOSTART_12     | (409)  | -----                                                                    | -----                             | -----      | -----            | -----  | ----- | ----- | ----- | GCTGAGGACGAAGAGGAGCGACCACTTTGAC   | CGTAGGACA  | AACTATAGGAAACGGT | ----- | ----- | ----- |
| APOSTART_14     | (406)  | -----                                                                    | -----                             | -----      | -----            | -----  | ----- | ----- | ----- | GCCGAGGACGAAGAGGAGCGACCACTTTGAC   | CGTAGGACA  | AACTATAGGAAACGGT | ----- | ----- | ----- |
| APOSTART_15     | (403)  | -----                                                                    | -----                             | -----      | -----            | -----  | ----- | ----- | ----- | GCCGAGGACGAAGAGGAGCGACCACTTTGAC   | CGTAGGACA  | AACTATAGGAAACGGT | ----- | ----- | ----- |
| APOSTART_13     | (406)  | -----                                                                    | -----                             | -----      | -----            | -----  | ----- | ----- | ----- | GCTGAGGACGAAGAGGAGCGACCACTTTGAC   | CGTAGGACA  | AACTATAGGAAACGGT | ----- | ----- | ----- |
| APOSTART_1_GEN  | (1696) | ATTCTACTCTTAGACTATCTTGTACCTAAGTGTTTCGCTGAATTAAGTACAAATTTAATTACCAATGCAGG  | GCTGAGGACGAAGAAAGAGCGGCCCACTTTGAC | CGTAGGACA  | AACTATAGGAAACGGT | AAGAAG |       |       |       |                                   |            |                  |       |       |       |
| APOSTART_2_GEN  | (1673) | ATTCTACTCTTAGACTATCTTGTACGTAAGTGTTTCGCTGAATTAAGTACAAATTTAATTACCAATGTAGG  | GCTGAGGACGAAGAAAGAGCGGCCCACTTTGAC | CGTAGGACA  | AACTATAGGAAACGGT | AAGAAG |       |       |       |                                   |            |                  |       |       |       |
| APOSTART_5_GEN  | (1580) | ATT-----AGACTATCTTATACCTAAACCTTTTCGCTAAATTAATTAGAAATTGAATTGCATATGTAGG    | GCTGAAAGACGAAGAGGAACGGCCGACTTTGAC | ACGTAGGACA | AACTATAGGAAACGGT | AAGAAG |       |       |       |                                   |            |                  |       |       |       |
| APOSTART_6_GEN  | (1571) | AT--T-----AGACTATCTTATACCTAAACCTTTTTCGCTAAATTAAGTACAAATTTAATTACCAATGCAGG | GCTGAAAGACGAAGAGGAACGGCCGACTTTGAC | ACGTAGGACA | AACTATAGGAAACGGT | AAGAAG |       |       |       |                                   |            |                  |       |       |       |
| APOSTART_7_GEN  | (1711) | ATTCTACTCTTAGACTATCTTATACCTAAACGTTTTCGCTGAATTAAGTACAAATTTAATTACCAATGCAGG | GCTGAAAGACGAAGAAAGAGCGACCACTTTGAC | CGTAGGACA  | AACTATAGGAAACGGT | AAGAAG |       |       |       |                                   |            |                  |       |       |       |
| APOSTART_8_GEN  | (1714) | ATTCTACTCTTAGACTATCTTATACCTAAACCTTTTCGCTAAATTAATTAGAAATTGAATTGCATATGTAGG | GCTGAGGACGAAGAAAGAGCGGCCCACTTTGAC | CGTAGGACA  | AACTATAGGAAACGGT | AAGAAG |       |       |       |                                   |            |                  |       |       |       |
| APOSTART_10_GEN | (1696) | ATTCTACTCTTAGACTATCTTGTACCTAAGTGTTTCGCTGAATTAAGTACAAATTTAATTCCA-ATGCAGG  | GCTGAGGACGAAGAAAGAGCGGCCCACTTTGAC | CGTAGGACA  | AACTATAGGAAACGGT | AAGAAG |       |       |       |                                   |            |                  |       |       |       |
| APOSTART_12_GEN | (1704) | ATTCTACTCTTAGACTATCTTATACCTAAACGTTTTCGCTGAATTAAGTACAAATTTAATTACCAATGCAGT | GCTGAGGACGAAGAGGAGCGACCACTTTGAC   | CGTAGGACA  | AACTATAGGAAACGGT | AAGAAG |       |       |       |                                   |            |                  |       |       |       |



|                 |        |                                                                                                            |             |            |           |       |       |       |       |       |       |       |             |            | Section 15 |
|-----------------|--------|------------------------------------------------------------------------------------------------------------|-------------|------------|-----------|-------|-------|-------|-------|-------|-------|-------|-------------|------------|------------|
|                 | (1877) | 1877                                                                                                       | 1890        | 1900       | 1910      | 1920  | 1930  | 1940  | 1950  | 1960  | 1970  | 1980  | 1990        | 2000       | 2010       |
| APOSTART 1      | (463)  | -----                                                                                                      | -----       | -----      | -----     | ----- | ----- | ----- | ----- | ----- | ----- | ----- | CCCCCCGAATC | GATACATGAC | TGGACCAAT  |
| APOSTART 2      | (463)  | -----                                                                                                      | -----       | -----      | -----     | ----- | ----- | ----- | ----- | ----- | ----- | ----- | CCCCCCGAATC | GATACATGAC | TGGACAAAT  |
| APOSTART_3      | (463)  | -----                                                                                                      | -----       | -----      | -----     | ----- | ----- | ----- | ----- | ----- | ----- | ----- | CCCCCCGAATC | GATACATGAC | TGGACCAAT  |
| APOSTART_4      | (466)  | -----                                                                                                      | -----       | -----      | -----     | ----- | ----- | ----- | ----- | ----- | ----- | ----- | CCCCCCGAATC | GATACATGAC | TGGACCAAT  |
| APOSTART_5      | (463)  | -----                                                                                                      | -----       | -----      | -----     | ----- | ----- | ----- | ----- | ----- | ----- | ----- | CCCCCCGAATC | CATACATGAT | TGGACCTAT  |
| APOSTART_6      | (463)  | -----                                                                                                      | -----       | -----      | -----     | ----- | ----- | ----- | ----- | ----- | ----- | ----- | CCCCCCGAATC | CATACATGAT | TGGACCAAT  |
| APOSTART 7      | (466)  | -----                                                                                                      | -----       | -----      | -----     | ----- | ----- | ----- | ----- | ----- | ----- | ----- | CCCCCCGAATC | GATACATGAC | TGGACCAAT  |
| APOSTART_8      | (466)  | -----                                                                                                      | -----       | -----      | -----     | ----- | ----- | ----- | ----- | ----- | ----- | ----- | CCCCCCGAATC | GATACATGAC | TGGACCAAT  |
| APOSTART_9      | (463)  | -----                                                                                                      | -----       | -----      | -----     | ----- | ----- | ----- | ----- | ----- | ----- | ----- | CCCCCCGAATC | GATACATGAC | TGGACCAAT  |
| APOSTART_10     | (466)  | -----                                                                                                      | -----       | -----      | -----     | ----- | ----- | ----- | ----- | ----- | ----- | ----- | CCCCCCGAATC | GATACATGAC | TGGACCAAT  |
| APOSTART_11     | (460)  | -----                                                                                                      | -----       | -----      | -----     | ----- | ----- | ----- | ----- | ----- | ----- | ----- | CCCCCCGAATC | GATACATGAC | TGGACCAAT  |
| APOSTART_12     | (466)  | -----                                                                                                      | -----       | -----      | -----     | ----- | ----- | ----- | ----- | ----- | ----- | ----- | CCCCCCGAATC | GATACATGAC | TGGACCAAT  |
| APOSTART_14     | (463)  | -----                                                                                                      | -----       | -----      | -----     | ----- | ----- | ----- | ----- | ----- | ----- | ----- | CCCCCCGAATC | GATACATGAC | TGGACCAAT  |
| APOSTART_15     | (460)  | -----                                                                                                      | -----       | -----      | -----     | ----- | ----- | ----- | ----- | ----- | ----- | ----- | CCCCCCGAATC | GATACATGAC | TGGACCAAT  |
| APOSTART_13     | (463)  | -----                                                                                                      | -----       | -----      | -----     | ----- | ----- | ----- | ----- | ----- | ----- | ----- | CCCCCCGAATC | GATACATGAC | TGGACCAAT  |
| APOSTART_1_GEN  | (1830) | TTGCACTGACTACCTGAGTGAAGAAGAGTACTGATTTGCAAGTTGGATTTTTCATCTT-----TGCATTCTACATTAAATTCACCGTGTCTTTCTGGTGCTAGGT  | CCCCCCGAATC | GATACATGAC | TGGACCAAT |       |       |       |       |       |       |       |             |            |            |
| APOSTART_2_GEN  | (1807) | TTGCACTGACTACCTGAGTGAAGAATAGTACTGATTTGCAAGTTGGATTTTTCATCTT-----TGCATTCTACATAAAATTCACCGTGTCTTTCTGGTGCTAGGT  | CCCCCCGAATC | GATACATGAC | TGGACAAAT |       |       |       |       |       |       |       |             |            |            |
| APOSTART_5_GEN  | (1706) | TTACACCGACTACCCGAGTGAAGCAGAGGATTGATTTGCATGTTGGATTTTGCATTTTTCATGCTACATAAAATAAAACTCAGCATGTCTTTATGGTGCTAGGT   | CCCCCCGAATC | CATACATGAT | TGGACCTAT |       |       |       |       |       |       |       |             |            |            |
| APOSTART_6_GEN  | (1697) | TTACACCGACTACCCGAGTGAAGCAGAGGATTGATTTGCATGTTGGATTTTGCATATTTGCATGCTACATAAAATAAAACTCAGCGTGTCTTTATGGTGCTAGGT  | CCCCCCGAATC | CATACATGAT | TGGACCAAT |       |       |       |       |       |       |       |             |            |            |
| APOSTART_7_GEN  | (1845) | TTGCACTGACTACCCGAGTGAAGAAGAGTACTGATTTGCAAGTTGGATTTTTCATCTT-----TGCATTCTAAATAAAATTCACCATGTCTTTCTGGTGCTAGGT  | CCCCCCGAATC | GATACATGAC | TGGACCAAT |       |       |       |       |       |       |       |             |            |            |
| APOSTART_8_GEN  | (1848) | TTACACCGACTACCCGAGTGAAGCAGAGGATTGATTTGCATGTTGGATTTTGCATTTTTCATGCTACATAAAATAAAACTCAGCATGTCTTTATGGTGCTAGGT   | CCCCCCGAATC | GATACATGAC | TGGACCAAT |       |       |       |       |       |       |       |             |            |            |
| APOSTART_10_GEN | (1829) | TTGCACTGACTACCTGAGTGAAGAAGAGTACTGATTTGCAAAGTTGGATTTTTCATCTTTGCATTCTCATTTAAATTCACCGTGTC-----TTTC-TGGGCTAGGT | CCCCCCGAATC | GATACATGAC | TGGACCAAT |       |       |       |       |       |       |       |             |            |            |
| APOSTART_12_GEN | (1838) | TTGCACTGACTACCCGAGTGAAGAAGAGTACTGATTTGCAAGTTGGATTTTTCATCTT-----TGCATTCTAAATAAAATTCACCATGTCTTTCTGGTGCTAGGT  | CCCCCCGAATC | GATACATGAC | TGGACCAAT |       |       |       |       |       |       |       |             |            |            |
|                 |        |                                                                                                            |             |            |           |       |       |       |       |       |       |       |             |            | Section 16 |

|                 |        |      |           |          |       |      |         |      |       |      |        |      |                     |              | Section 16                                       |
|-----------------|--------|------|-----------|----------|-------|------|---------|------|-------|------|--------|------|---------------------|--------------|--------------------------------------------------|
|                 | (2011) | 2011 | 2020      | 2030     | 2040  | 2050 | 2060    | 2070 | 2080  | 2090 | 2100   | 2110 | 2120                | 2130         | 2144                                             |
| APOSTART 1      | (493)  | GAA  | CCTGATATC | GGTTTGT  | CAAA  | TCAA | AGTGATC | CCTG | CACAA | TC   | ATTCTC | AAAG | AAGAATTGGCGGCTACTTC | GATGCCAAAATG | -----                                            |
| APOSTART 2      | (493)  | GAG  | CCTGATATC | GGTTTGT  | CAAA  | TCAG | AGTGATC | CCTG | CACAA | TC   | GTTCTC | AAAG | AAGAATTGGCGGCTACTTC | GATGCCAAAATG | -----                                            |
| APOSTART_3      | (493)  | GAA  | CCTGATATC | GGTTTGT  | CAAA  | TCAA | AGTGATC | CCTG | CACAA | TC   | ATTCTC | AAAG | AAGAATTGGCGGCTACTTC | GATGCCAAAATG | -----                                            |
| APOSTART_4      | (496)  | GAG  | CCTGATATC | GGTTTGT  | CAAA  | TCAG | AGTGATC | CCTG | CACAG | TCT  | TTTCTC | AAAG | AAGAATTGGCGGCTACTTC | GATGCCAAAATG | -----                                            |
| APOSTART_5      | (493)  | GAG  | CCTGATAT  | TGGTTTGT | TCGAG | TCAG | AGTGAC  | CCTT | CACAA | TC   | TTTCTC | GAAA | AAGAATTGGCGGCTACTTA | GATGCCAAAATG | -----                                            |
| APOSTART_6      | (493)  | GAG  | CCTGATAT  | TGGTTTGT | TCGAG | TCAG | AGTGAC  | CCTT | CACAA | TC   | TTTCTC | GAAA | AAGAATTGGCGGCTACTTA | GATGCCAAAATG | -----                                            |
| APOSTART 7      | (496)  | GAA  | CCTGATATC | GGTTTGT  | CAAA  | TCAG | AGTGATC | CCTG | CACAG | TCT  | TTTCTC | AAAG | AAGAATTGGCGGCTACTTC | GATGCCAAAATG | -----                                            |
| APOSTART_8      | (496)  | GAA  | CCTGATATC | GGTTTGT  | CAAA  | TCAA | AGTGATC | CCTG | CACAA | TC   | ATTCTC | AAAG | AAGAATTGGCGGCTACTTC | GATGCCAAAATG | -----                                            |
| APOSTART_9      | (493)  | GAA  | CCTGATATC | GGTTTGT  | CAAA  | TCAA | AGTGATC | CCTG | CACAA | TC   | ATTCTC | AAAG | AAGAATTGGCGGCTACTTC | GATGCCAAAATG | -----                                            |
| APOSTART_10     | (496)  | GAA  | CCTGATATC | GGTTTGT  | CAAA  | TCAA | AGTGATC | CCTG | CACAA | TC   | ATTCTC | AAAG | AAGAATTGGCGGCTACTTC | GATGCCAAAATG | -----                                            |
| APOSTART_11     | (490)  | GAA  | CCTGATATC | GGTTTGT  | CAAA  | TCAA | AGTGATC | CCTG | CACAA | TC   | ATTCTC | AAAG | AAGAATTGGCGGCTACTTC | GATGCCAAAATG | -----                                            |
| APOSTART_12     | (496)  | GAG  | CCTGATATC | GGTTTGT  | CAAA  | TCAG | AGTGATC | CCTG | CACAG | TCT  | TTTCTC | AAAG | AAGAATTGGCGGCTACTTC | GATGCCAAAATG | -----                                            |
| APOSTART_14     | (493)  | GAG  | CCTGATATC | GGTTTGT  | CAAA  | TCAG | AGTGATC | CCTG | CACAG | TCT  | TTTCTC | AAAG | AAGAATTGGCGGCTACTTC | GATGCCAAAATG | -----                                            |
| APOSTART_15     | (490)  | GAG  | CCTGATATC | GGTTTGT  | CAAA  | TCAG | AGTGATC | CCTG | CACAG | TCT  | TTTCTC | AAAG | AAGAATTGGCGGCTACTTC | GATGCCAAAATG | CAAGCCAAAGTTCCTTATCCTTATGTCATCTACCCT-----TGCTTG- |
| APOSTART_13     | (493)  | GAG  | CCTGATATC | GGTTTGT  | CAAA  | TCAG | AGTGATC | CCTG | CACAG | TCT  | TTTCTC | AAAG | AAGAATTGGCGGCTACTTC | GATGCCAAAATG | -----                                            |
| APOSTART_1_GEN  | (1959) | GAA  | CCTGATATC | GGTTTGT  | CAAA  | TCAA | AGTGATC | CCTG | CACAA | TC   | ATTCTC | AAAG | AAGAATTGGCGGCTACTTC | GATGCCAAAATG | CAAGCCAAAGTTCCTTCTCCTTATGTCATCTACCCT-----TGCATGT |
| APOSTART_2_GEN  | (1936) | GAG  | CCTGATATC | GGTTTGT  | CAAA  | TCAG | AGTGATC | CCTG | CACAA | TC   | GTTCTC | AAAG | AAGAATTGGCGGCTACTTC | GATGCCAAAATG | CAAGCCAAAGTTCCTTCTCCTTATGTCATCTACCCT-----TGCATGT |
| APOSTART_5_GEN  | (1840) | GAG  | CCTGATAT  | TGGTTTGT | TCGAG | TCAG | AGTGAC  | CCTT | CACAA | TC   | TTTCTC | GAAA | AAGAATTGGCGGCTACTTA | GATGCCAAAATG | CAAGCCCAACTTCCCTTACCTTATGTCATCCACCCTAACCTTGTATAT |
| APOSTART_6_GEN  | (1831) | GAG  | CCTGATAT  | TGGTTTGT | TCGAG | TCAG | AGTGAC  | CCTT | CACAA | TC   | TTTCTC | GAAA | AAGAATTGGCGGCTACTTA | GATGCCAAAATG | CAAGCCCAACTTCCCTTACCTTATGTCATCCACCCTAACCTTGTATAT |
| APOSTART_7_GEN  | (1974) | GAA  | CCTGATATC | GGTTTGT  | CAAA  | TCAG | AGTGATC | CCTG | CACAG | TCT  | TTTCTC | AAAG | AAGAATTGGCGGCTACTTC | GATGCCAAAATG | CAAGCCAAAGTTC-TTCTCCTTATGTCATCTACCCT-----TGCATGT |
| APOSTART_8_GEN  | (1982) | GAA  | CCTGATATC | GGTTTGT  | CAAA  | TCAA | AGTGATC | CCTG | CACAA | TC   | ATTCTC | AAAG | AAGAATTGGCGGCTACTTC | GATGCCAAAATG | CAAGCCAAAGTTCCTTCTCCTTATGTCATCTACCCT-----TGCATGT |
| APOSTART_10_GEN | (1957) | GAA  | CCTGATATC | GGTTTGT  | CAAA  | TCAA | AGTGATC | CCTG | CACAA | TC   | ATTCTC | AAAG | AAGAATTGGCGGCTACTTC | GATGCCAAAATG | CAAGCCAAAGTTCCTTCTCCTTATGTCATCTACCCT-----TGCATGT |
| APOSTART_12_GEN | (1967) | GAG  | CCTGATATC | GGTTTGT  | CAAA  | TCAG | AGTGATC | CCTG | CACAG | TCT  | TTTCTC | AAAG | AAGAATTGGCGGCTACTTC | GATGCCAAAATG | CAAGCCAAAGTTCCTTCTCCTTATGTCATCTACCCT-----TGCATGT |

Section 182412

|                 | (2413) | 2413                                    | 2420                       | 2430                                       | 2440                                       | 2450                    | 2460   | 2470  | 2480  | 2490  | 2500  | 2510  | 2520                                           | 2530                    | 2546                    |
|-----------------|--------|-----------------------------------------|----------------------------|--------------------------------------------|--------------------------------------------|-------------------------|--------|-------|-------|-------|-------|-------|------------------------------------------------|-------------------------|-------------------------|
| APOSTART_1      | (719)  | AGT                                     | -----                      | -----                                      | -----                                      | -----                   | -----  | ----- | ----- | ----- | ----- | ----- | GGGACTGTAGCTTTTCGCTATGG                        | CAGTTT                  |                         |
| APOSTART_2      | (719)  | AGT                                     | -----                      | -----                                      | -----                                      | -----                   | -----  | ----- | ----- | ----- | ----- | ----- | GGGACTGTAGCTTTTCGCTATGG                        | CAGTTT                  |                         |
| APOSTART_3      | (719)  | AGT                                     | -----                      | -----                                      | -----                                      | -----                   | -----  | ----- | ----- | ----- | ----- | ----- | GGGACTGTAGCTTTTCGCTATGG                        | CAGTTT                  |                         |
| APOSTART_4      | (722)  | AAT                                     | -----                      | -----                                      | -----                                      | -----                   | -----  | ----- | ----- | ----- | ----- | ----- | GGGACTGTAGCTTTTCGCTATGG                        | CAGTTT                  |                         |
| APOSTART_5      | (719)  | AGT                                     | -----                      | -----                                      | -----                                      | -----                   | -----  | ----- | ----- | ----- | ----- | ----- | GGGACTGTAGCTTTTCGCTATGG                        | CAGTTT                  |                         |
| APOSTART_6      | (719)  | AGT                                     | -----                      | -----                                      | -----                                      | -----                   | -----  | ----- | ----- | ----- | ----- | ----- | GGGACTGTAGCTTTTCGCTATGG                        | CAGTTT                  |                         |
| APOSTART_7      | (722)  | AGT                                     | -----                      | -----                                      | -----                                      | -----                   | -----  | ----- | ----- | ----- | ----- | ----- | GGGACTGTAGCTTTTCGCTATGG                        | AAGTTT                  |                         |
| APOSTART_8      | (722)  | AGT                                     | -----                      | -----                                      | -----                                      | -----                   | -----  | ----- | ----- | ----- | ----- | ----- | GGGACTGTAGCTTTTCGCTATGG                        | CAGTTT                  |                         |
| APOSTART_9      | (719)  | AGT                                     | -----                      | -----                                      | -----                                      | -----                   | -----  | ----- | ----- | ----- | ----- | ----- | GGGACTGTAGCTTTTCGCTATGG                        | CAGTTT                  |                         |
| APOSTART_10     | (704)  | AGT                                     | -----                      | -----                                      | -----                                      | -----                   | -----  | ----- | ----- | ----- | ----- | ----- | GGGACTGTAGCTTTTCGCTATGG                        | CAGTTT                  |                         |
| APOSTART_11     | (716)  | AGT                                     | -----                      | -----                                      | -----                                      | -----                   | -----  | ----- | ----- | ----- | ----- | ----- | GGGACTGTAGCTTTTCGCTATGG                        | CAGTTT                  |                         |
| APOSTART_12     | (722)  | AAT                                     | -----                      | -----                                      | -----                                      | -----                   | -----  | ----- | ----- | ----- | ----- | ----- | GGGACTGTAGCTTTTCGCTATGG                        | CAGTTT                  |                         |
| APOSTART_14     | (719)  | AAT                                     | -----                      | -----                                      | -----                                      | -----                   | -----  | ----- | ----- | ----- | ----- | ----- | GGGACTGTAGCTTTTCGCTATGG                        | CAGTTT                  |                         |
| APOSTART_15     | (788)  | AAT                                     | -----                      | -----                                      | -----                                      | -----                   | -----  | ----- | ----- | ----- | ----- | ----- | GGGACTGTAGCTTTTCGCTATGG                        | CAGTTT                  |                         |
| APOSTART_13     | (719)  | AAT                                     | -----                      | -----                                      | -----                                      | -----                   | -----  | ----- | ----- | ----- | ----- | ----- | GGGACTGTAGCTTTTCGCTATGG                        | CAGTTT                  |                         |
| APOSTART_1_GEN  | (2355) | AGTAAGCGT----                           | GCTCTTTAACTCTCTGCTGTT----- | -----                                      | -----                                      | -----                   | -----  | ----- | ----- | ----- | ----- | ----- | ACAACACTACCGATGCTGATGTCGATATTTATTCTCCAACATAGGT | GGGACTGTAGCTTTTCGCTATGG | CAGTTT                  |
| APOSTART_2_GEN  | (2332) | AGTAAGCGTCTGTCTCTTTAACTCTCTGCTGTT-----  | -----                      | -----                                      | -----                                      | -----                   | -----  | ----- | ----- | ----- | ----- | ----- | ACAACACTACCGATGCTGATGTCGATATTTATTCTCCAACATAGGT | GGGACTGTAGCTTTTCGCTATGG | CAGTTT                  |
| APOSTART_5_GEN  | (2226) | AGTAAGCGTCCGGCCTCTTTA-CTCTCCGATGTTCCAAC | -----                      | -----                                      | -----                                      | -----                   | -----  | ----- | ----- | ----- | ----- | ----- | CCGATGCTGATGCCGATATTTT---                      | CCAATCATAGGT            | GGGACTGTAGCTTTTCGCTATGG |
| APOSTART_6_GEN  | (2217) | AGTAAGCGTCTGGCCTCTTTAACTCTCCGATGTTT     | -----                      | C-----                                     | -----                                      | -----                   | -----  | ----- | ----- | ----- | ----- | ----- | AACTACCAATGCTGATGCCAACATTT--                   | TCACAATCATAGGT          | GGGACTGTAGCTTTTCGCTATGG |
| APOSTART_7_GEN  | (2369) | AGTAAGTGTCTGGCCTCTTTAACTCTCTGCTGTTCCAAC | TACCGATGCTGCCCTTTAAAAAAA   | AACTACCGATGCTGATGTCCATCTTTATTCTCCACTATAGGT | GGGACTGTAGCTTTTCGCTATGG                    | AAGTTT                  |        |       |       |       |       |       |                                                |                         |                         |
| APOSTART_8_GEN  | (2378) | AGTAAGTGTCTGGCCTCTTTAACTCTCTGCTGTTCCAAC | TACCGATGCTGCCCTTTAAAAAAA   | AACTACCGATGCTGATGTCCATCTTTATTCTCCACTATAGGT | GGGACTGTAGCTTTTCGCTATGG                    | CAGTTT                  |        |       |       |       |       |       |                                                |                         |                         |
| APOSTART_10_GEN | (2353) | AGTAAGCGT--G-----                       | -----                      | C-TCTTTAACTCTCTGCTGTTACA                   | AACTACCGATGCTGATGTCGATATTTATTCTCCAACATAGGT | GGGACTGTAGCTTTTCGCTATGG | CAGTTT |       |       |       |       |       |                                                |                         |                         |
| APOSTART_12_GEN | (2363) | AATAAGCCTCTGTCTCTTTAACTATCTG-----       | CTGTT-----                 | -----                                      | -----                                      | -----                   | -----  | ----- | ----- | ----- | ----- | ----- | ACAACACTACCGATGCTGATGTCGATATTTATTCTCCAACATAGGT | GGGACTGTAGCTTTTCGCTATGG | CAGTTT                  |

|                 | (2547) | 2547               | 2560           | 2570          | 2580                          | 2590                          | 2600                     | 2610                   | 2620                                 | 2630                 | 2640  | 2650  | 2660  | 2670  | 2680  |
|-----------------|--------|--------------------|----------------|---------------|-------------------------------|-------------------------------|--------------------------|------------------------|--------------------------------------|----------------------|-------|-------|-------|-------|-------|
| APOSTART_1      | (750)  | AGTCGAAGAGGTTGATGG | CACACCG        | CCATACTCTATCA | TAAGTTGCAGCTGCACTGGTGTCCAATGT | -----                         | -----                    | -----                  | -----                                | -----                | ----- | ----- | ----- | ----- | ----- |
| APOSTART_2      | (750)  | AGTCGAAGAGGTTGATGG | CACACCG        | CCATACTCTATCA | TAAGTTGCAGCTGCACTGGTGTCCAATGT | -----                         | -----                    | -----                  | -----                                | -----                | ----- | ----- | ----- | ----- | ----- |
| APOSTART_3      | (750)  | AGTCGAAGAGGTTGATGG | CACACCG        | CCATACTCTATCA | TAAGTTGCAGCTGCACTGGTGTCCAATGT | -----                         | -----                    | -----                  | -----                                | -----                | ----- | ----- | ----- | ----- | ----- |
| APOSTART_4      | (753)  | AGTCGAAGAGGTTGATGG | CACACCG        | TGATACTCTATCA | TAAGTTGCAGCTGCACTGGTGTCCAATGT | -----                         | -----                    | -----                  | -----                                | -----                | ----- | ----- | ----- | ----- | ----- |
| APOSTART_5      | (750)  | GATC               | GAAGAGGTTGATGG | CACACCG       | CGATACTCTATCA                 | CAAGTTGCAGCTGCACTGGTGTCCAATGT | -----                    | -----                  | -----                                | -----                | ----- | ----- | ----- | ----- | ----- |
| APOSTART_6      | (750)  | GATC               | GAAGAGGTTGATGG | CACACCG       | CGATACTCTATCA                 | CAAGTTGCAGCTGCACTGGTGTCCAATGT | -----                    | -----                  | -----                                | -----                | ----- | ----- | ----- | ----- | ----- |
| APOSTART_7      | (753)  | AGTCGAAGAGGTTGATGG | G              | CACACCG       | CCATACTCTATCA                 | TAAGTTGCAGCTGCACTGGTGTCCAATGT | -----                    | -----                  | -----                                | -----                | ----- | ----- | ----- | ----- | ----- |
| APOSTART_8      | (753)  | AGTCGAAGAGGTTGATGG | CACACCG        | CCATACTCTATCA | TAAGTTGCAGCTGCACTGGTGTCCAATGT | -----                         | -----                    | -----                  | -----                                | -----                | ----- | ----- | ----- | ----- | ----- |
| APOSTART_9      | (750)  | AGTCGAAGAGGTTGATGG | CACACCG        | CCATACTCTATCA | TAAGTTGCAGCTGCACTGGTGTCCAATGT | -----                         | -----                    | -----                  | -----                                | -----                | ----- | ----- | ----- | ----- | ----- |
| APOSTART_10     | (735)  | AGTCGAAGAGGTTGATGG | CACACCG        | CCATACTCTATCA | TAAGTTGCAGCTGCACTGGTGTCCAATGT | -----                         | -----                    | -----                  | -----                                | -----                | ----- | ----- | ----- | ----- | ----- |
| APOSTART_11     | (747)  | AGTCGAAGAGGTTGATGG | CACACCG        | CCATACTCTATCA | TAAGTTGCAGCTGCACTGGTGTCCAATGT | -----                         | -----                    | -----                  | -----                                | -----                | ----- | ----- | ----- | ----- | ----- |
| APOSTART_12     | (753)  | AGTCGAAGAGGTTGATGG | CACACCG        | CGATACTCTATCA | TAAGTTGCAGCTGCACTGGTGTCCAATGT | -----                         | -----                    | -----                  | -----                                | -----                | ----- | ----- | ----- | ----- | ----- |
| APOSTART_14     | (750)  | AGTCGAAGAGGTTGATGG | CACACCG        | TGATACTCTATCA | TAAGTTGCAGCTGCACTGGTGTCCAATGT | -----                         | -----                    | -----                  | -----                                | -----                | ----- | ----- | ----- | ----- | ----- |
| APOSTART_15     | (819)  | AGTCGAAGAGGTTGATGG | CACACCG        | TGATACTCTATCA | TAAGTTGCAGCTGCACTGGTGTCCAATGT | -----                         | -----                    | -----                  | -----                                | -----                | ----- | ----- | ----- | ----- | ----- |
| APOSTART_13     | (750)  | AGTCGAAGAGGTTGATGG | CACACCG        | CGATACTCTATCA | TAAGTTGCAGCTGCACTGGTGTCCAATGT | -----                         | -----                    | -----                  | -----                                | -----                | ----- | ----- | ----- | ----- | ----- |
| APOSTART_1_GEN  | (2457) | AGTCGAAGAGGTTGATGG | CACACCG        | CCATACTCTATCA | TAAGTTGCAGCTGCACTGGTGTCCAATGT | AA-CCACATTT--                 | CATGTCAACA               | AACTGTGTACCGTCTGTAAT-- | TTTTTGGATTGTCTGTCAGA                 |                      |       |       |       |       |       |
| APOSTART_2_GEN  | (2438) | AGTCGAAGAGGTTGATGG | CACACCG        | CCATACTCTATCA | TAAGTTGCAGCTGCACTGGTGTCCAATGT | AA-CCACATTT--                 | CATGTCAACA               | AACTGTGTACCGTCTGTAAT-- | TTTTTGGATTGTCTGTCAGA                 |                      |       |       |       |       |       |
| APOSTART_5_GEN  | (2327) | GATC               | GAAGAGGTTGATGG | CACACCG       | CGATACTCTATCA                 | CAAGTTGCAGCTGCACTGGTGTCCAATGT | AAACCATATTCTCATATTTCAACA | ACCGTTT                | TAGCGTCTGTAATACGTTTTTGGATTGTCTGTCAGA |                      |       |       |       |       |       |
| APOSTART_6_GEN  | (2321) | GATC               | GAAGAGGTTGATGG | CACACCG       | CGATACTCTATCA                 | CAAGTTGCAGCTGCACTGGTGTCCAATGT | AAACCATATTCTCATATTTCAACA | ACCGTTT                | TAGCGTCTGTAATACGTTTTTGGATTGTCTGTCAGA |                      |       |       |       |       |       |
| APOSTART_7_GEN  | (2503) | AGTCGAAGAGGTTGATGG | G              | CACACCG       | CCATACTCTATCA                 | TAAGTTGCAGCTGCACTGGTGTCCAATGT | AA-CCACATTTT             | CACATGTCAACA           | AACTGTGTACCGTCTATAAA--               | TTTTTGGATTGTCTGTCAGA |       |       |       |       |       |
| APOSTART_8_GEN  | (2512) | AGTCGAAGAGGTTGATGG | CACACCG        | CCATACTCTATCA | TAAGTTGCAGCTGCACTGGTGTCCAATGT | AA-CCACATTTT                  | CACATGTCAACA             | AACTGTGTACCGTCTATAAA-- | TTTTTGGATTGTCTGTCAGA                 |                      |       |       |       |       |       |
| APOSTART_10_GEN | (2455) | AGTCGAAGAGGTTGATGG | CACACCG        | CCATACTCTATCA | TAAGTTGCAGCTGCACTGGTGTCCAATGT | AA-CCACATTT--                 | CATGTCAACA               | AACTGTGTACCGTCTGTAAT-- | TTTTTGGATTGTCTGTCAGA                 |                      |       |       |       |       |       |
| APOSTART_12_GEN | (2469) | AGTCGAAGAGGTTGATGG | CACACCG        | CGATACTCTATCA | TAAGTTGCAGCTGCACTGGTGTCCAATGT | AA-CCACATTT--                 | CATGTCAACA               | AACTGTGTACCGTCTGTAAT-- | TTTTTGGATTGTCTGTCAGA                 |                      |       |       |       |       |       |

|                 |        | (2681)                                   | 2681                       | 2690           | 2700                    | 2710                             | 2720  | 2730  | 2740  | 2750  | 2760  | 2770  | 2780  | 2790  | 2800  | 2814  |
|-----------------|--------|------------------------------------------|----------------------------|----------------|-------------------------|----------------------------------|-------|-------|-------|-------|-------|-------|-------|-------|-------|-------|
| APOSTART_1      | (818)  | -----                                    | -----                      | -----          | -----                   | -----                            | ----- | ----- | ----- | ----- | ----- | ----- | ----- | ----- | ----- | ----- |
| APOSTART_2      | (818)  | -----                                    | -----                      | -----          | -----                   | -----                            | ----- | ----- | ----- | ----- | ----- | ----- | ----- | ----- | ----- | ----- |
| APOSTART_3      | (818)  | -----                                    | -----                      | -----          | -----                   | -----                            | ----- | ----- | ----- | ----- | ----- | ----- | ----- | ----- | ----- | ----- |
| APOSTART_4      | (821)  | -----                                    | -----                      | -----          | -----                   | -----                            | ----- | ----- | ----- | ----- | ----- | ----- | ----- | ----- | ----- | ----- |
| APOSTART_5      | (818)  | -----                                    | -----                      | -----          | -----                   | -----                            | ----- | ----- | ----- | ----- | ----- | ----- | ----- | ----- | ----- | ----- |
| APOSTART_6      | (818)  | -----                                    | -----                      | -----          | -----                   | -----                            | ----- | ----- | ----- | ----- | ----- | ----- | ----- | ----- | ----- | ----- |
| APOSTART_7      | (821)  | -----                                    | -----                      | -----          | -----                   | -----                            | ----- | ----- | ----- | ----- | ----- | ----- | ----- | ----- | ----- | ----- |
| APOSTART_8      | (821)  | -----                                    | -----                      | -----          | -----                   | -----                            | ----- | ----- | ----- | ----- | ----- | ----- | ----- | ----- | ----- | ----- |
| APOSTART_9      | (818)  | -----                                    | -----                      | -----          | -----                   | -----                            | ----- | ----- | ----- | ----- | ----- | ----- | ----- | ----- | ----- | ----- |
| APOSTART_10     | (803)  | -----                                    | -----                      | -----          | -----                   | -----                            | ----- | ----- | ----- | ----- | ----- | ----- | ----- | ----- | ----- | ----- |
| APOSTART_11     | (815)  | -----                                    | -----                      | -----          | -----                   | -----                            | ----- | ----- | ----- | ----- | ----- | ----- | ----- | ----- | ----- | ----- |
| APOSTART_12     | (821)  | -----                                    | -----                      | -----          | -----                   | -----                            | ----- | ----- | ----- | ----- | ----- | ----- | ----- | ----- | ----- | ----- |
| APOSTART_14     | (818)  | -----                                    | -----                      | -----          | -----                   | -----                            | ----- | ----- | ----- | ----- | ----- | ----- | ----- | ----- | ----- | ----- |
| APOSTART_15     | (887)  | -----                                    | -----                      | -----          | -----                   | -----                            | ----- | ----- | ----- | ----- | ----- | ----- | ----- | ----- | ----- | ----- |
| APOSTART_13     | (818)  | -----                                    | -----                      | -----          | -----                   | -----                            | ----- | ----- | ----- | ----- | ----- | ----- | ----- | ----- | ----- | ----- |
| APOSTART_1_GEN  | (2584) | CTGAAATTTACATTCTTCCATCCTACATGAATATTCAGGT | TAGTGTGGCCTAAAGATCTGTGTTAC | GTTCGTTACTGGCG | ACGCAATGATGATGGAAGCTATG | GTAAACCCTTGAATTTTTTCATGTTCTGTCC  |       |       |       |       |       |       |       |       |       |       |
| APOSTART_2_GEN  | (2565) | CTGAAATTTACATTCTTCCATCCTACATGAATATTCAGGT | TAGTGTGGCCTAAAGATCTGTGTTAC | GTTCGTTACTGGCG | ACGCAATGATGATGGAAGCTATG | GTAAACCCTTGAATTTTTTCATGTTCTGTCC  |       |       |       |       |       |       |       |       |       |       |
| APOSTART_5_GEN  | (2461) | TTGAACCTTACATTCTTCCATCTTGCAT-AACATACAGGT | TAGTGTGGCCTAGGATCTCTGTTAC  | GTTCGTTACTGGCG | ACGCAATGATGATGGAAGCTATG | GTAAATTCCTTGAATTTTCCATGCTCATTTTC |       |       |       |       |       |       |       |       |       |       |
| APOSTART_6_GEN  | (2455) | TTGAACCTTACATTCTTCCATCTTGCAT-AACATACAGGT | TAGTGTGGCCTAGGATCTCTGTTAC  | GTTCGTTACTGGCG | ACGCAATGATGATGGAAGCTATG | GTAAATTATTGAATTTTCCATGCTCATTTTC  |       |       |       |       |       |       |       |       |       |       |
| APOSTART_7_GEN  | (2633) | CTGAAATTTACATTCTTCCATCCTACATGAATATTCAGGT | TAGTGTGGCCTAGGATCTCTGTTAC  | GTTCGTTACTGGCG | ACGCAATGATGATGGAAGCTATG | GTAAACCCTTGAATTTTCCATGTTCTGTAC   |       |       |       |       |       |       |       |       |       |       |
| APOSTART_8_GEN  | (2642) | CTGAAATTTACATTCTTCCATCCTACATGAATATTCAGGT | TAGTGTGGCCTAGGATCTCTGTTAC  | GTTCGTTACTGGCG | ACGCAATGATGATGGAAGCTATG | GTAAACCCTTGAATTTTCCATGTTCTGTAC   |       |       |       |       |       |       |       |       |       |       |
| APOSTART_10_GEN | (2582) | CTGAAATTTACATTCTTCCATCCTACATGAATATTCAGGT | TAGTGTGGCCTAGGATCTCTGTTAC  | GTTCGTTACTGGCG | ACGCAATGATGATGGAAGCTATG | GTAAACCCTTGAATTTTTTCATGTTCTGTCC  |       |       |       |       |       |       |       |       |       |       |
| APOSTART_12_GEN | (2596) | CTGAAATTTACATTCTTCCATCCTACATGAATATTCAGGT | TAGTGTGGCCTAGGATCTCTGTTAC  | GTTCGTTACTGGCG | ACGCAATGATGATGGAAGCTATG | GTAAACTCTTGAATTTTTTCATGTTCTGTCC  |       |       |       |       |       |       |       |       |       |       |

|                 |        | (2815)                                                          | 2815                   | 2820              | 2830         | 2840                | 2850  | 2860  | 2870  | 2880  | 2890  | 2900  | 2910  | 2920  | 2930  | 2948  |
|-----------------|--------|-----------------------------------------------------------------|------------------------|-------------------|--------------|---------------------|-------|-------|-------|-------|-------|-------|-------|-------|-------|-------|
| APOSTART_1      | (881)  | -----                                                           | -----                  | -----             | -----        | -----               | ----- | ----- | ----- | ----- | ----- | ----- | ----- | ----- | ----- | ----- |
| APOSTART_2      | (881)  | -----                                                           | -----                  | -----             | -----        | -----               | ----- | ----- | ----- | ----- | ----- | ----- | ----- | ----- | ----- | ----- |
| APOSTART_3      | (881)  | -----                                                           | -----                  | -----             | -----        | -----               | ----- | ----- | ----- | ----- | ----- | ----- | ----- | ----- | ----- | ----- |
| APOSTART_4      | (884)  | -----                                                           | -----                  | -----             | -----        | -----               | ----- | ----- | ----- | ----- | ----- | ----- | ----- | ----- | ----- | ----- |
| APOSTART_5      | (881)  | -----                                                           | -----                  | -----             | -----        | -----               | ----- | ----- | ----- | ----- | ----- | ----- | ----- | ----- | ----- | ----- |
| APOSTART_6      | (881)  | -----                                                           | -----                  | -----             | -----        | -----               | ----- | ----- | ----- | ----- | ----- | ----- | ----- | ----- | ----- | ----- |
| APOSTART_7      | (884)  | -----                                                           | -----                  | -----             | -----        | -----               | ----- | ----- | ----- | ----- | ----- | ----- | ----- | ----- | ----- | ----- |
| APOSTART_8      | (884)  | -----                                                           | -----                  | -----             | -----        | -----               | ----- | ----- | ----- | ----- | ----- | ----- | ----- | ----- | ----- | ----- |
| APOSTART_9      | (881)  | -----                                                           | -----                  | -----             | -----        | -----               | ----- | ----- | ----- | ----- | ----- | ----- | ----- | ----- | ----- | ----- |
| APOSTART_10     | (866)  | -----                                                           | -----                  | -----             | -----        | -----               | ----- | ----- | ----- | ----- | ----- | ----- | ----- | ----- | ----- | ----- |
| APOSTART_11     | (878)  | -----                                                           | -----                  | -----             | -----        | -----               | ----- | ----- | ----- | ----- | ----- | ----- | ----- | ----- | ----- | ----- |
| APOSTART_12     | (884)  | -----                                                           | -----                  | -----             | -----        | -----               | ----- | ----- | ----- | ----- | ----- | ----- | ----- | ----- | ----- | ----- |
| APOSTART_14     | (881)  | -----                                                           | -----                  | -----             | -----        | -----               | ----- | ----- | ----- | ----- | ----- | ----- | ----- | ----- | ----- | ----- |
| APOSTART_15     | (950)  | -----                                                           | -----                  | -----             | -----        | -----               | ----- | ----- | ----- | ----- | ----- | ----- | ----- | ----- | ----- | ----- |
| APOSTART_13     | (881)  | -----                                                           | -----                  | -----             | -----        | -----               | ----- | ----- | ----- | ----- | ----- | ----- | ----- | ----- | ----- | ----- |
| APOSTART_1_GEN  | (2718) | CGTCACCTTCGCTGTCTGTATCATCTTTTGATCGACAATGTATATTTGTTCTTACACATACAG | TTGTGCTGTTTCGATCTATCGA | ACATCCAAACTGTGGCC | CCAACGAGGATA | CGTAAGGGCTTTTATTGAA |       |       |       |       |       |       |       |       |       |       |
| APOSTART_2_GEN  | (2699) | CGTCACCTTCGCTGTCTGTACCATCTTTTGATCGACAATGTATATTTGTTCTTACACATACAG | TTGTGCTGTTTCGATCTATCGA | ACATCCAAACTGTGGCC | CCAACGAGGATA | CGTAAGGGCTTTTATTGAA |       |       |       |       |       |       |       |       |       |       |
| APOSTART_5_GEN  | (2594) | ---AACTTTTTCTGTTTGTACCATCTTCTGATTGGCATTGTATGTTT-TTCTTACACATATAG | TTGTGCTGTTTCGATCTATCGA | GATCCAAACTGTGGCC  | CCAACGAGGATA | GTAAAGGGCTTTTATTGAA |       |       |       |       |       |       |       |       |       |       |
| APOSTART_6_GEN  | (2588) | ---AACTTTTTCTGTTTGTACCATCTTCTGATTGGCATTATATGTTTAT-CTTACACATATAG | TTGTGCTGTTTCGATCTATCGA | GATCCAAACTGTGGCC  | CCAACGAGGATA | GTAAAGGGCTTTTATTGAA |       |       |       |       |       |       |       |       |       |       |
| APOSTART_7_GEN  | (2767) | CGTCACCTTCGCTGTCTGTACCATCTTTTAATCGACAATGTATATTTGTTCTTACACATACAG | TTGTGCTGTTTCGATCTATCGA | ACATCCAAACTGTGGCC | CCAACGAGGATA | CGTAAGGGCTTTTATTGAA |       |       |       |       |       |       |       |       |       |       |
| APOSTART_8_GEN  | (2776) | CGTCACCTTCGCTGTCTGTACCATCTTTTAATCGACAATGTATATTTGTTCTTACACATACAG | TTGTGCTGTTTCGATCTATCGA | ACATCCAAACTGTGGCC | CCAACGAGGATA | CGTAAGGGCTTTTATTGAA |       |       |       |       |       |       |       |       |       |       |
| APOSTART_10_GEN | (2716) | CGTCACCTTCGCTGTCTGTACCATCTTTTGATCGACAATGTATATTTGTTCTTACACATACAG | TTGTGCTGTTTCGATCTATCGA | ACATCCAAACTGTGGCC | CCAACGAGGATA | CGTAAGGGCTTTTATTGAA |       |       |       |       |       |       |       |       |       |       |
| APOSTART_12_GEN | (2730) | CGTCACCTTCGCTGTCTGTATCATCTTTTGATCGACAATGTATATTTGTTCTTACACATACAG | TTGTGCTGTTTCGATCTATCGA | ACATCCAAACTGTGGCC | CCAACGAGGATA | GTAAAGGGCTTTTATTGAA |       |       |       |       |       |       |       |       |       |       |

|                 | (2949) | 2949                                                                                                                        | 2960 | 2970 | 2980 | 2990 | 3000 | 3010 | 3020 | 3030 | 3040 | 3050 | 3060 | 3070  | 3082    |
|-----------------|--------|-----------------------------------------------------------------------------------------------------------------------------|------|------|------|------|------|------|------|------|------|------|------|-------|---------|
| APOSTART 1      | (952)  | AGT                                                                                                                         |      |      |      |      |      |      |      |      |      |      |      | GGAGG | TTCAAGA |
| APOSTART 2      | (952)  | AGT                                                                                                                         |      |      |      |      |      |      |      |      |      |      |      | GGAGG | TTCAAGA |
| APOSTART_3      | (952)  | AGT                                                                                                                         |      |      |      |      |      |      |      |      |      |      |      | GGAGG | TTCAAGA |
| APOSTART_4      | (955)  | AGT                                                                                                                         |      |      |      |      |      |      |      |      |      |      |      | GGAGG | TTCAAGA |
| APOSTART_5      | (952)  | AGG                                                                                                                         |      |      |      |      |      |      |      |      |      |      |      | GGAGG | TTCAAGA |
| APOSTART_6      | (952)  | AGT                                                                                                                         |      |      |      |      |      |      |      |      |      |      |      | GGAGG | TTCAAGA |
| APOSTART 7      | (955)  | AGT                                                                                                                         |      |      |      |      |      |      |      |      |      |      |      | GGAGG | TTCAAGA |
| APOSTART_8      | (955)  | AGT                                                                                                                         |      |      |      |      |      |      |      |      |      |      |      | GGAGG | TTCAAGA |
| APOSTART_9      | (952)  | AGT                                                                                                                         |      |      |      |      |      |      |      |      |      |      |      | GGAGG | TTCAAGA |
| APOSTART_10     | (937)  | AGT                                                                                                                         |      |      |      |      |      |      |      |      |      |      |      | GGAGG | TTCAAGA |
| APOSTART_11     | (949)  | AGT                                                                                                                         |      |      |      |      |      |      |      |      |      |      |      | GGAGG | TTCAAGA |
| APOSTART_12     | (955)  | AGT                                                                                                                         |      |      |      |      |      |      |      |      |      |      |      | GGAGG | TTCAAGA |
| APOSTART_14     | (952)  | AGT                                                                                                                         |      |      |      |      |      |      |      |      |      |      |      | GGAGG | TTCAAGA |
| APOSTART_15     | (1021) | AGT                                                                                                                         |      |      |      |      |      |      |      |      |      |      |      | GGAGG | TTCAAGA |
| APOSTART_13     | (952)  | AGT                                                                                                                         |      |      |      |      |      |      |      |      |      |      |      | GGAGG | TTCAAGA |
| APOSTART_1_GEN  | (2852) | AGTAAGTCTTCTTCTGACCATCTGATATTCTTCATATTTACCCGGGAGGATGAGACACTTAAATAAAACAAAATTAAC TTGCGTTACTTT-CTTTCTCTGAAC-TTCCTACTAGTTCAGGT  |      |      |      |      |      |      |      |      |      |      |      | GGAGG | TTCAAGA |
| APOSTART_2_GEN  | (2833) | AGTAAGTCTTCTTCTGACCATCTGATATTCGT CATATTTACCCGGGAGGATGAGACACTTAAATAAAACAAAATTAAC TTGAGCTACTTT-CTTTCTCTGAAC-TTCCTACTAGTTCAGGT |      |      |      |      |      |      |      |      |      |      |      | GGAGG | TTCAAGA |
| APOSTART_5_GEN  | (2724) | AGTAAGTCTCCTTCTCACCATTGTGACCGTTCAT-TTTACCCGAGAGGATGATACATTTCAAATAAAACAAAATTAAC TTGATTGTTTTTCCTTTTTTGAAAATTCCTACTAGTTCAGG-   |      |      |      |      |      |      |      |      |      |      |      | GGAGG | TTCAAGA |
| APOSTART_6_GEN  | (2718) | AGTAAGTCTCCTTCTCACCATTGTGACCGTTCAT-TTTACCCGAGTGGATGATACATTTCAAATAAAACAAAATTAAC TTGATTGTTTTTCCTTTTTCTGAAA-TTCCTACTAGTTCAGGT  |      |      |      |      |      |      |      |      |      |      |      | GGAGG | TTCAAGA |
| APOSTART_7_GEN  | (2901) | AGTAAGTCTTCTTCTGACCATCTGATATTCTTCATATTTACCCGAGGGGATGAGACACTTAAATAAAACAAAATTAAC TTGAGTTACTTT-CTTTCTCTGAAC-TTCCTACTAGTTCAGGT  |      |      |      |      |      |      |      |      |      |      |      | GGAGG | TTCAAGA |
| APOSTART_8_GEN  | (2910) | AGTAAGTCTTCTTCTGACCATCTGATATTCTTCATATTTACCCGAGGGGATGAGACACTTAAATAAAACAAAATTAAC TTGAGTTACTTT-CTTTCTCTGAAC-TTCCTACTAGTTCAGGT  |      |      |      |      |      |      |      |      |      |      |      | GGAGG | TTCAAGA |
| APOSTART_10_GEN | (2850) | AGTAAGTCTTCTTCTGACCATCTGATATTCTTCATATTTACCCGGGAGGATGAGACACTTAAATAAAACAAAATTAAC TTGCGTTACTTT-CTTTCTCTGAAC-TTCCTACTAGTTCAGGT  |      |      |      |      |      |      |      |      |      |      |      | GGAGG | TTCAAGA |
| APOSTART_12_GEN | (2864) | AGTAAGTCTTCTTCTGACCATCTGATATTCTTCATATTTACCCGGGAGGATGAGACACTTAAATAAAACAAAATTAAC TTGAGCTACTTT-CTTTCTCTGAAC-TTCCTACTAGTTCAGGT  |      |      |      |      |      |      |      |      |      |      |      | GGAGG | TTCAAGA |

|                 | (3083) | 3083          | 3090         | 3100        | 3110                             | 3120                             | 3130           | 3140         | 3150        | 3160                 | 3170                 | 3180    | 3190  | 3200                 | 3216 |       |
|-----------------|--------|---------------|--------------|-------------|----------------------------------|----------------------------------|----------------|--------------|-------------|----------------------|----------------------|---------|-------|----------------------|------|-------|
| APOSTART 1      | (968)  | TTTCTCCTCTCAA | ATGTCGCAACGG | ACGGCCAC    | GTACTCAAGTTCAACACCTTATGCAGATTGAC | CTGAGAGGATGGTT                   | CTGAACTACTC    | CCCTTCCTTTTC | AGTATCA     | CTCTTTGCTGCAGATACAGA | GA                   | ACTGT   |       |                      |      |       |
| APOSTART 2      | (968)  | TTTCTCCTCTCAA | ATGTCGCAACGG | ACGACCA     | GTACTCAAGTTCAACACCTTATGCAGATTGAC | CTGAGAGGATGGTT                   | CTGAACTACTC    | CCCTTCCTTTTC | G           | GTATCA               | CTCTTTGCTGCAGATACAGA | GA      | ACTGT |                      |      |       |
| APOSTART_3      | (968)  | TTTCTCCTCTCAA | ATGTCGCAACGG | ACGGCCAC    | GTACTCAAGTTCAACACCTTATGCAGATTGAC | CTGAGAGGATGGTT                   | CTGAACTACTC    | CCCTTCCTTTTC | AGTATCA     | CTCTTTGCTGCAGATACAGA | GA                   | ACTGT   |       |                      |      |       |
| APOSTART_4      | (971)  | TTTCTCCTCTCAA | ATGTCGCAACGG | ACGACCA     | ATACTCAAGTTCAACACCTTATGCAGATTGAC | CTGAGAGGATGGTT                   | CTGAACTACTC    | CCCTTCCTTTTC | AGTATCA     | CTCTTTGCTGCAGATACAGA | GA                   | ACTGT   |       |                      |      |       |
| APOSTART_5      | (968)  | TTTCTCCTCTCAA | G            | TGTCGCAACGG | CAGGCCG                          | GTACTCAAGTTCAACACCTTATGCAGATTGAT | CTGAGAGGATGGTT | T            | CTGAACTACTC | T                    | CCTTCCTTTTC          | AGTATCA | T     | CTCTTTGCTGCAGATACAGA | AA   | ACTGT |
| APOSTART_6      | (968)  | TTTCTCCTCTCAA | G            | TGTCGCAACGG | ACGGCCG                          | GTACTCAAGTTCAACACCTTATGCAGATTGAT | CTGAGAGGATGGTT | T            | CTGAACTACTC | T                    | CCTTCCTTTTC          | AGTATCA | T     | CTCTTTGCTGCAGATACAGA | AA   | ACTGT |
| APOSTART 7      | (971)  | TTTCTCCTCTCAA | ATGTCGCAACGG | ACGACCA     | GTACTCAAGTTCAACACCTTATGCAGATTGAC | CTGAGAGGATGGTT                   | CTGAACTACTC    | CCCTTCCTTTTC | AGTATCA     | CTCTTTGCTGCAGATACAGA | GA                   | ACTGT   |       |                      |      |       |
| APOSTART_8      | (971)  | TTTCTCCTCTCAA | ATGTCGCAACGG | ACGGCCAC    | GTACTCAAGTTCAACACCTTATGCAGATTGAC | CTGAGAGGATGGTT                   | CTGAACTACTC    | CCCTTCCTTTTC | AGTATCA     | CTCTTTGCTGCAGATACAGA | GA                   | ACTGT   |       |                      |      |       |
| APOSTART_9      | (968)  | TTTCTCCTCTCAA | ATGTCGCAACGG | ACGGCCAC    | GTACTCAAGTTCAACACCTTATGCAGATTGAC | CTGAGAGGATGGTT                   | CTGAACTACTC    | CCCTTCCTTTTC | AGTATCA     | CTCTTTGCTGCAGATACAGA | GA                   | ACTGT   |       |                      |      |       |
| APOSTART_10     | (953)  | TTTCTCCTCTCAA | ATGTCGCAACGG | ACGGCCAC    | GTACTCAAGTTCAACACCTTATGCAGATTGAC | CTGAGAGGATGGTT                   | CTGAACTACTC    | CCCTTCCTTTTC | AGTATCA     | CTCTTTGCTGCAGATACAGA | GA                   | ACTGT   |       |                      |      |       |
| APOSTART_11     | (965)  | TTTCTCCTCTCAA | ATGTCGCAACGG | ACGGCCAC    | GTACTCAAGTTCAACACCTTATGCAGATTGAC | CTGAGAGGATGGTT                   | CTGAACTACTC    | CCCTTCCTTTTC | AGTATCA     | CTCTTTGCTGCAGATACAGA | GA                   | ACTGT   |       |                      |      |       |
| APOSTART_12     | (971)  | TTTCTCCTCTCAA | ATGTCGCAACGG | ACGACCA     | GTACTCAAGTTCAACACCTTATGCAGATTGAC | CTGAGAGGATGGTT                   | CTGAACTACTC    | CCCTTCCTTTTC | AGTATCA     | CTCTTTGCTGCAGATACAGA | GA                   | ACTGT   |       |                      |      |       |
| APOSTART_14     | (968)  | TTTCTCCTCTCAA | ATGTCGCAACGG | ACGACCA     | ATACTCAAGTTCAACACCTTATGCAGATTGAC | CTGAGAGGATGGTT                   | CTGAACTACTC    | CCCTTCCTTTTC | AGTATCA     | CTCTTTGCTGCAGATACAGA | GA                   | ACTGT   |       |                      |      |       |
| APOSTART_15     | (1037) | TTTCTCCTCTCAA | ATGTCGCAACGG | ACGACCA     | ATACTCAAGTTCAACACCTTATGCAGATTGAC | CTGAGAGGATGGTT                   | CTGAACTACTC    | CCCTTCCTTTTC | AGTATCA     | CTCTTTGCTGCAGATACAGA | GA                   | ACTGT   |       |                      |      |       |
| APOSTART_13     | (968)  | TTTCTCCTCTCAA | ATGTCGCAACGG | ACGACCA     | GTACTCAAGTTCAACACCTTATGCAGATTGAC | CTGAGAGGATGGTT                   | CTGAACTACTC    | CCCTTCCTTTTC | AGTATCA     | CTCTTTGCTGCAGATACAGA | GA                   | ACTGT   |       |                      |      |       |
| APOSTART_1_GEN  | (2984) | TTTCTCCTCTCAA | ATGTCGCAACGG | ACGGCCAC    | GTACTCAAGTTCAACACCTTATGCAGATTGAC | CTGAGAGGATGGTT                   | CTGAACTACTC    | CCCTTCCTTTTC | AGTATCA     | CTCTTTGCTGCAGATACAGA | GA                   | ACTGT   |       |                      |      |       |
| APOSTART_2_GEN  | (2965) | TTTCTCCTCTCAA | ATGTCGCAACGG | ACGACCA     | GTACTCAAGTTCAACACCTTATGCAGATTGAC | CTGAGAGGATGGTT                   | CTGAACTACTC    | CCCTTCCTTTTC | G           | GTATCA               | CTCTTTGCTGCAGATACAGA | GA      | ACTGT |                      |      |       |
| APOSTART_5_GEN  | (2856) | TTTCTCCTCTCAA | G            | TGTCGCAACGG | CAGGCCG                          | GTACTCAAGTTCAACACCTTATGCAGATTGAT | CTGAGAGGATGGTT | T            | CTGAACTACTC | T                    | CCTTCCTTTTC          | AGTATCA | T     | CTCTTTGCTGCAGATACAGA | AA   | ACTGT |
| APOSTART_6_GEN  | (2850) | TTTCTCCTCTCAA | G            | TGTCGCAACGG | ACGGCCG                          | GTACTCAAGTTCAACACCTTATGCAGATTGAT | CTGAGAGGATGGTT | T            | CTGAACTACTC | T                    | CCTTCCTTTTC          | AGTATCA | T     | CTCTTTGCTGCAGATACAGA | AA   | ACTGT |
| APOSTART_7_GEN  | (3033) | TTTCTCCTCTCAA | ATGTCGCAACGG | ACGACCA     | GTACTCAAGTTCAACACCTTATGCAGATTGAC | CTGAGAGGATGGTT                   | CTGAACTACTC    | CCCTTCCTTTTC | AGTATCA     | CTCTTTGCTGCAGATACAGA | GA                   | ACTGT   |       |                      |      |       |
| APOSTART_8_GEN  | (3042) | TTTCTCCTCTCAA | ATGTCGCAACGG | ACGGCCAC    | GTACTCAAGTTCAACACCTTATGCAGATTGAC | CTGAGAGGATGGTT                   | CTGAACTACTC    | CCCTTCCTTTTC | AGTATCA     | CTCTTTGCTGCAGATACAGA | GA                   | ACTGT   |       |                      |      |       |
| APOSTART_10_GEN | (2982) | TTTCTCCTCTCAA | ATGTCGCAACGG | ACGGCCAC    | GTACTCAAGTTCAACACCTTATGCAGATTGAC | CTGAGAGGATGGTT                   | CTGAACTACTC    | CCCTTCCTTTTC | AGTATCA     | CTCTTTGCTGCAGATACAGA | GA                   | ACTGT   |       |                      |      |       |
| APOSTART_12_GEN | (2996) | TTTCTCCTCTCAA | ATGTCGCAACGG | ACGACCA     | GTACTCAAGTTCAACACCTTATGCAGATTGAC | CTGAGAGGATGGTT                   | CTGAACTACTC    | CCCTTCCTTTTC | AGTATCA     | CTCTTTGCTGCAGATACAGA | GA                   | ACTGT   |       |                      |      |       |



|                        | (3217) | 3217    | 3230 | 3240                                                                    | 3250                                      | 3260                   | 3270 | 3280 | 3290 | 3300 | 3310 | 3320                       | 3330                       | 3340    | 3350 |
|------------------------|--------|---------|------|-------------------------------------------------------------------------|-------------------------------------------|------------------------|------|------|------|------|------|----------------------------|----------------------------|---------|------|
| APOSTART 1 (1102)      |        | GTTGCTG | G    |                                                                         |                                           |                        |      |      |      |      |      |                            | ACTGCGCGAATACTTTTCACAAACAG | ATGAATG |      |
| APOSTART 2 (1102)      |        | GTTGCTG | G    |                                                                         |                                           |                        |      |      |      |      |      |                            | ACTGCGCGAATACTTTTCACAAACAG | ATGAATG |      |
| APOSTART_3 (1102)      |        | GTTGCTG | G    |                                                                         |                                           |                        |      |      |      |      |      |                            | ACTGCGCGAATACTTTTCACAAACAG | ATGAATG |      |
| APOSTART_4 (1105)      |        | GTTGCTG | G    | G                                                                       |                                           |                        |      |      |      |      |      |                            | CTGCGCGAATACTTTTCACAAACAG  | ATGAATG |      |
| APOSTART_5 (1102)      |        | GTTGCTG | G    | G                                                                       |                                           |                        |      |      |      |      |      |                            | CTGCGCGAATACTTTTCACAAACAG  | ATGAATG |      |
| APOSTART_6 (1102)      |        | GTTGCTG | G    | G                                                                       |                                           |                        |      |      |      |      |      |                            | CTGCGCGAATACTTTTCACAAACAG  | ATGAATG |      |
| APOSTART 7 (1105)      |        | GTTGCTG | G    |                                                                         |                                           |                        |      |      |      |      |      |                            | ACTGCGCGAATACTTTTCACAAACAG | ATGAATG |      |
| APOSTART_8 (1105)      |        | GTTGCTG | G    |                                                                         |                                           |                        |      |      |      |      |      |                            |                            | ATGAATG |      |
| APOSTART_9 (1102)      |        | GTTGCTG | G    |                                                                         |                                           |                        |      |      |      |      |      |                            | ACTGCGCGAATACTTTTCACAAACAG | ATGAATG |      |
| APOSTART_10 (1087)     |        | GTTGCTG | G    |                                                                         |                                           |                        |      |      |      |      |      |                            | ACTGCGCGAATACTTTTCACAAACAG | ATGAATG |      |
| APOSTART_11 (1099)     |        | GTTGCTG | G    |                                                                         |                                           |                        |      |      |      |      |      |                            | ACTGCGCGAATACTTTTCACAAACAG | ATGAATG |      |
| APOSTART_12 (1105)     |        | GTTGCTG | G    | G                                                                       |                                           |                        |      |      |      |      |      |                            | CTGCGCGAATACTTTTCACAAACAG  | ATGAATG |      |
| APOSTART_14 (1102)     |        | GTTGCTG | G    |                                                                         |                                           |                        |      |      |      |      |      |                            |                            | ATGAATG |      |
| APOSTART_15 (1171)     |        | GTTGCTG | G    | G                                                                       |                                           |                        |      |      |      |      |      |                            | CTGCGCGAATACTTTTCACAAACAG  | ATGAATG |      |
| APOSTART_13 (1102)     |        | GTTGCTG | G    |                                                                         |                                           |                        |      |      |      |      |      |                            |                            | ATGAATG |      |
| APOSTART_1_GEN (3118)  |        | GTTGCTG | G    | TACTGCATTTGGTTTTTCCTTATTAACAACC                                         | --TGAACACAGTTACCAATTCATACTGGTACTTGTGGATT  | TAACTGACACTTACTGCCAGG  |      |      |      |      |      | ACTGCGCGAATACTTTTCACAAACAG | ATGAATG                    |         |      |
| APOSTART_2_GEN (3099)  |        | GTTGCTG | G    | TACTGCATTTGGTTTTTCCTTATTAACAACCTCTGAACACAGTTACCAATTCATATTGGTACTTGTGGATT | TAACTGACACTTACTGCCAGG                     |                        |      |      |      |      |      | ACTGCGCGAATACTTTTCACAAACAG | ATGAATG                    |         |      |
| APOSTART_5_GEN (2990)  |        | GTTGCTG | G    | TACTGCATGTG-TTTTCCCTTATTGGAAACC                                         | --TGAACATAATTCACCAATTCATTCTGGTACTTGTGGATT | TAACTGACACTTACTGCCAGGG |      |      |      |      |      | CTGCGCGAATACTTTTCACAAACAG  | ATGAATG                    |         |      |
| APOSTART_6_GEN (2984)  |        | GTTGCTG | G    | TACTGCATGTGCTTTTCCCTTATTGGCAACC                                         | --TGAACATAATTCACCAATTCATTCTGGTACTTGTGGATT | TAACTGACACTTACTGCCAGGG |      |      |      |      |      | CTGCGCGAATACTTTTCACAAACAG  | ATGAATG                    |         |      |
| APOSTART_7_GEN (3167)  |        | GTTGCTG | G    | TACTGCATTTGGTTTTCCCTTATTAACAACC                                         | --TGAACACAGTTACCAATTCATACTGGTACTTGTGTTTT  | TAACTGACACTTACTGCCAGG  |      |      |      |      |      | ACTGCGCGAATACTTTTCACAAACAG | ATGAATG                    |         |      |
| APOSTART_8_GEN (3176)  |        | GTTGCTG | G    | TACTGCATTTGGTTTTCCCTTATTAACAACC                                         | --TGAACACAGTTACCAATTCATACTGGTACTTGTGTTTT  | TAACTGACACTTACTGCCAGG  |      |      |      |      |      | ACTGCGCGAATACTTTTCACAAACAG | ATGAATG                    |         |      |
| APOSTART_10_GEN (3116) |        | GTTGCTG | G    | TACTGCATTTGGTTTTTCCTTATTAACAACC                                         | --TGAACACAGTTACCAATTCATACTGGTACTTGTGGATT  | TAACTGACACTTACTGCCAGG  |      |      |      |      |      | ACTGCGCGAATACTTTTCACAAACAG | ATGAATG                    |         |      |
| APOSTART_12_GEN (3130) |        | GTTGCTG | G    | TACTGCATTTGGTTTTTCCTTATTAACAACC                                         | ACTGAACACAGTTACCAATTCATATTGGTACTTGTGGATT  | TAACTGACACTTACTGCCAGGG |      |      |      |      |      | CTGCGCGAATACTTTTCACAAACAG  | ATGAATG                    |         |      |

|                        | (3351) | 3351            | 3360             | 3370           | 3380 | 3390   | 3400  | 3410      | 3420 | 3430       | 3440      | 3450   | 3460                | 3470                | 3484        |
|------------------------|--------|-----------------|------------------|----------------|------|--------|-------|-----------|------|------------|-----------|--------|---------------------|---------------------|-------------|
| APOSTART 1 (1143)      |        | CCATATAACTCCAAG | GATTCCTGTGATGGAA | AACATGGTTGATCC | ATCG | ATGCG  | GAAAA | CCAGAAGCT | ACAT | GAAATGGAGT | CCAAGA    | CTAA   | CCAGCACATGGAGGACAAG | CAGATAATAA          | AGCATGTCTGA |
| APOSTART 2 (1143)      |        | CCATATAACTCCAAG | GATTCCTGTGATGGAA | AACATGGTTGATCC | ATCG | ATGCG  | GAAAA | CCAGAAGCT | ACAT | GAAATGGAGT | CCAAGA    | CTAA   | CCAGCACATGGAGGACAAG | CAGATAATAA          | AGCATGTCTGA |
| APOSTART_3 (1143)      |        | CCATATAACTCCAAG | GATTCCTGTGATGGAA | AACATGGTTGATCC | ATCG | ATGCG  | GAAAA | CCAGAAGCT | ACAT | GAAATGGAGT | CCAAGA    | CTAA   | CCAGCACATGGAGGACAAG | CAGATAATAA          | AGCATGTCTGA |
| APOSTART_4 (1146)      |        | CCATATAACTCCAAG | GATTCCTGTGATGGAA | AACATGGTTGATCC | GTC  | AATGCG | GAAAA | CCAGAAGCT | TCA  | C          | GAAATGGAA | TCCAAG | TCTAAG              | CCAGCACATGGAGGACAAG | CAGATAATAAG |
| APOSTART_5 (1143)      |        | CCATATAACTCCAAG | AATTCCTGTGATGGAG | AACATGGTTGATCC | GTC  | AATGCG | GAAAA | CCAGAAGCT | TCA  | C          | GAAATGGAA | TCCAAG | TCTAAG              | CCAGCACATGGAGGACAAG | CAGATAATAAG |
| APOSTART_6 (1143)      |        | CCATATAACTCCAAG | AATTCCTGTGATGGAG | AACATGGTTGATCC | GTC  | AATGCG | GAAAA | CCAGAAGCT | TCA  | C          | GAAATGGAA | TCCAAG | TCTAAG              | CCAGCACATGGAGGACAAG | CAGATAATAAG |
| APOSTART 7 (1146)      |        | CCATATAACTCCAAG | GATTCCTGTGATGGAA | AACATGGTTGATCC | GTC  | GATGCT | GAAAA | CCAGAAGCT | G    | CAT        | GAAATGGAG | CCAAGA | CTAA                | CCAGCACATGGAGGACAAG | CAGATAATAA  |
| APOSTART_8 (1119)      |        | CCATATAACTCCAAG | GATTCCTGTGATGGAA | AACATGGTTGATCC | ATCG | AATGCG | GAAAA | CCAGAAGCT | ACAT | GAAATGGAGT | CCAAGA    | CTAA   | CCAGCACATGGAGGACAAG | CAGATAATAA          | AGCATGTCTGA |
| APOSTART_9 (1143)      |        | CCATATAACTCCAAG | GATTCCTGTGATGGAA | AACATGGTTGATCC | ATCG | GATGCG | GAAAA | CCAGAAGCT | ACAT | GAAATGGAGT | CCAAGA    | CTAA   | CCAGCACATGGAGGACAAG | CAGATAATAA          | AGCATGTCTGA |
| APOSTART_10 (1128)     |        | CCATATAACTCCAAG | GATTCCTGTGATGGAA | AACATGGTTGATCC | ATCG | GATGCG | GAAAA | CCAGAAGCT | ACAT | GAAATGGAGT | CCAAGA    | CTAA   | CCAGCACATGGAGGACAAG | CAGATAATAA          | AGCATGTCTGA |
| APOSTART_11 (1140)     |        | CCATATAACTCCAAG | GATTCCTGTGATGGAA | AACATGGTTGATCC | ATCG | GATGCG | GAAAA | CCAGAAGCT | ACAT | GAAATGGAGT | CCAAGA    | CTAA   | CCAGCACATGGAGGACAAG | CAGATAATAA          | AGCATGTCTGA |
| APOSTART_12 (1146)     |        | CCATATAACTCCAAG | GATTCCTGTGATGGAA | AACATGGTTGATCC | GTC  | AATGCG | GAAAA | CCAGAAGCT | TCA  | C          | GAAATGGAA | TCCAAG | TCTAAG              | CCAGCACATGGAGGACAAG | CAGATAATAAG |
| APOSTART_14 (1116)     |        | CCATATAACTCCAAG | GATTCCTGTGATGGAA | AACATGGTTGATCC | GTC  | AATGCG | GAAAA | CCAGAAGCT | TCA  | C          | GAAATGGAA | TCCAAG | TCTAAG              | CCAGCACATGGAGGACAAG | CAGATAATAAG |
| APOSTART_15 (1212)     |        | CCATATAACTCCAAG | GATTCCTGTGATGGAA | AACATGGTTGATCC | GTC  | AATGCG | GAAAA | CCAGAAGCT | TCA  | C          | GAAATGGAA | TCCAAG | TCTAAG              | CCAGCACATGGAGGACAAG | CAGATAATAAG |
| APOSTART_13 (1116)     |        | CCATATAACTCCAAG | GATTCCTGTGATGGAA | AACATGGTTGATCC | GTC  | AATGCG | GAAAA | CCAGAAGCT | TCA  | C          | GAAATGGAA | TCCAAG | TCTAAG              | CCAGCACATGGAGGACAAG | CAGATAATAAG |
| APOSTART_1_GEN (3250)  |        | CCATATAACTCCAAG | GATTCCTGTGATGGAA | AACATGGTTGATCC | ATCG | GATGCG | GAAAA | CCAGAAGCT | ACAT | GAAATGGAGT | CCAAGA    | CTAA   | CCAGCACATGGAGGACAAG | CAGATAATAA          | AGCATGTCTGA |
| APOSTART_2_GEN (3233)  |        | CCATATAACTCCAAG | GATTCCTGTGATGGAA | AACATGGTTGATCC | ATCG | GATGCG | GAAAA | CCAGAAGCT | ACAT | GAAATGGAGT | CCAAGA    | CTAA   | CCAGCACATGGAGGACAAG | CAGATAATAA          | AGCATGTCTGA |
| APOSTART_5_GEN (3121)  |        | CCATATAACTCCAAG | AATTCCTGTGATGGAG | AACATGGTTGATCC | GTC  | AATGCG | GAAAA | CCAGAAGCT | TCA  | C          | GAAATGGAA | TCCAAG | TCTAAG              | CCAGCACATGGAGGACAAG | CAGATAATAAG |
| APOSTART_6_GEN (3116)  |        | CCATATAACTCCAAG | AATTCCTGTGATGGAG | AACATGGTTGATCC | GTC  | AATGCG | GAAAA | CCAGAAGCT | TCA  | C          | GAAATGGAA | TCCAAG | TCTAAG              | CCAGCACATGGAGGACAAG | CAGATAATAAG |
| APOSTART_7_GEN (3299)  |        | CCATATAACTCCAAG | GATTCCTGTGATGGAA | AACATGGTTGATCC | GTC  | GATGCT | GAAAA | CCAGAAGCT | G    | CAT        | GAAATGGAG | CCAAGA | CTAA                | CCAGCACATGGAGGACAAG | CAGATAATAA  |
| APOSTART_8_GEN (3308)  |        | CCATATAACTCCAAG | GATTCCTGTGATGGAA | AACATGGTTGATCC | ATCG | AATGCG | GAAAA | CCAGAAGCT | ACAT | GAAATGGAGT | CCAAGA    | CTAA   | CCAGCACATGGAGGACAAG | CAGATAATAA          | AGCATGTCTGA |
| APOSTART_10_GEN (3248) |        | CCATATAACTCCAAG | GATTCCTGTGATGGAA | AACATGGTTGATCC | ATCG | GATGCG | GAAAA | CCAGAAGCT | ACAT | GAAATGGAGT | CCAAGA    | CTAA   | CCAGCACATGGAGGACAAG | CAGATAATAA          | AGCATGTCTGA |
| APOSTART_12_GEN (3264) |        | CCATATAACTCCAAG | GATTCCTGTGATGGAA | AACATGGTTGATCC | GTC  | AATGCG | GAAAA | CCAGAAGCT | TCA  | C          | GAAATGGAA | TCCAAG | TCTAAG              | CCAGCACATGGAGGACAAG | CAGATAATAAG |

|                        |        |          |          |      |      |            |              |      |                  |                                                                               |                                        |       |      |      | Section 27 |
|------------------------|--------|----------|----------|------|------|------------|--------------|------|------------------|-------------------------------------------------------------------------------|----------------------------------------|-------|------|------|------------|
|                        | (3485) | 3485     | 3490     | 3500 | 3510 | 3520       | 3530         | 3540 | 3550             | 3560                                                                          | 3570                                   | 3580  | 3590 | 3600 | 3618       |
| APOSTART 1 (1277)      |        | TAATCGAT | TGAAGAA  | ATC  | GAT  | TGAGGATGAT | GACTATCAAGTT | CC   | GAAGCTAACATAGAGG | -----                                                                         |                                        |       |      |      |            |
| APOSTART 2 (1277)      |        | TAATCGAT | TGAAGAGT | CG   | GAT  | TGAGGATGAT | GACTATCAAGTT | CC   | GAAGCTAACATAGAGG | -----                                                                         |                                        |       |      |      |            |
| APOSTART_3 (1277)      |        | TAATCGAT | TGAAGAA  | ATC  | GAT  | TGAGGATGAT | GACTATCAAGTT | CC   | GAAGCTAACATAGAGG | -----                                                                         |                                        |       |      |      |            |
| APOSTART_4 (1280)      |        | TAATCGAT | TGAAGAGT | CG   | AGAT | TGAGGATGAG | GACTATCAAGTT | GCT  | GAAGCTAACATAGAGG | -----                                                                         |                                        |       |      |      |            |
| APOSTART_5 (1277)      |        | TAATCGAT | TGAAGAGT | CG   | AGAT | TGAGGATGAG | GACTATCAAGTT | GCT  | GAAGCTAACATAGAGG | -----                                                                         |                                        |       |      |      |            |
| APOSTART_6 (1277)      |        | TAATCGAT | TGAAGAGT | CG   | AGAT | TGAGGATGAG | GACTATCAAGTT | GCT  | GAAGCTAACATAGAGG | -----                                                                         |                                        |       |      |      |            |
| APOSTART 7 (1280)      |        | TAATCGAT | TGAAGAGT | CG   | GAT  | TGAGGATGAT | GACTATCAAGTT | CC   | GAAGCTAACATAGAGG | -----                                                                         |                                        |       |      |      |            |
| APOSTART_8 (1253)      |        | TAATCGAT | TGAAGAA  | ATC  | GAT  | TGAGGATGAT | GACTATCAAGTT | CC   | GAAGCTAACATAGAGG | -----                                                                         |                                        |       |      |      |            |
| APOSTART_9 (1277)      |        | TAATCGAT | TGAAGAA  | ATC  | GAT  | TGAGGATGAT | GACTATCAAGTT | CC   | GAAGCTAACATAGAGG | -----                                                                         |                                        |       |      |      |            |
| APOSTART_10 (1262)     |        | TAATCGAT | TGAAGAA  | ATC  | GAT  | TGAGGATGAT | GACTATCAAGTT | CC   | GAAGCTAACATAGAGG | -----                                                                         |                                        |       |      |      |            |
| APOSTART_11 (1274)     |        | TAATCGAT | TGAAGAA  | ATC  | GAT  | TGAGGATGAT | GACTATCAAGTT | CC   | GAAGCTAACATAGAGG | -----                                                                         |                                        |       |      |      |            |
| APOSTART_12 (1280)     |        | TAATCGAT | TGAAGAGT | CG   | AGAT | TGAGGATGAG | GACTATCAAGTT | GCT  | GAAGCTAACATAGAGG | -----                                                                         |                                        |       |      |      |            |
| APOSTART_14 (1250)     |        | TAATCGAT | TGAAGAGT | CG   | AGAT | TGAGGATGAG | GACTATCAAGTT | GCT  | GAAGCTAACATAGAGG | -----                                                                         |                                        |       |      |      |            |
| APOSTART_15 (1346)     |        | TAATCGAT | TGAAGAGT | CG   | AGAT | TGAGGATGAG | GACTATCAAGTT | GCT  | GAAGCTAACATAGAGG | -----                                                                         |                                        |       |      |      |            |
| APOSTART_13 (1250)     |        | TAATCGAT | TGAAGAGT | CG   | AGAT | TGAGGATGAG | GACTATCAAGTT | GCT  | GAAGCTAACATAGAGG | -----                                                                         |                                        |       |      |      |            |
| APOSTART_1_GEN (3384)  |        | TAATCGAT | TGAAGAA  | ATC  | GAT  | TGAGGATGAT | GACTATCAAGTT | CC   | GAAGCTAACATAGAGG | TTACATATCCTGAGA--                                                             | ACACACTATGAAGAACCAGATTTTCATGATCAGTTTTT | ----- | ACAT |      |            |
| APOSTART_2_GEN (3367)  |        | TAATCGAT | TGAAGAGT | CG   | GAT  | TGAGGATGAT | GACTATCAAGTT | CC   | GAAGCTAACATAGAGG | TTACATATCCTGAGA--                                                             | ACACACTGTGACGAACCAGATTTTCATGATCAGTTTTT | ----- | ACAT |      |            |
| APOSTART_5_GEN (3255)  |        | TAATCGAT | TGAAGAGT | CG   | AGAT | TGAGGATGAG | GACTATCAAGTT | GCT  | GAAGCTAACATAGAGG | TTACATATCCTGAGACCACACACTATGAACACTCAGTTTTTCCTTATCAATTTACGTCATACATTTTTTTTACACGA |                                        |       |      |      |            |
| APOSTART_6_GEN (3250)  |        | TAATCGAT | TGAAGAGT | CG   | AGAT | TGAGGATGAG | GACTATCAAGTT | GCT  | GAAGCTAACATAGAGG | TTACATATCCTGAGACCACACACTATGAGCACCAGTTTTTCCTTATCAATTTACGTCGTACAGTTTTTTTACACGA  |                                        |       |      |      |            |
| APOSTART_7_GEN (3433)  |        | TAATCGA  | -GAAGAGT | CG   | GAT  | TGAGGATGAT | GACTATCAAGTT | CC   | GAAGCTAACATAGAGG | TTACATATCCTGAGA--                                                             | ACACACTATGAAGAACCAGATTTTCATGATCAGTTTTT | ----- | ACAT |      |            |
| APOSTART_8_GEN (3442)  |        | TAATCGAT | TGAAGAA  | ATC  | GAT  | TGAGGATGAT | GACTATCAAGTT | CC   | GAAGCTAACATAGAGG | TTACATATCCTGAGA--                                                             | ACACACTATGAAGAACCAGATTTTCATGATCAGTTTTT | ----- | ACAT |      |            |
| APOSTART_10_GEN (3382) |        | TAATCGAT | TGAAGAA  | ATC  | GAT  | TGAGGATGAT | GACTATCAAGTT | CC   | GAAGCTAACATAGAGG | TTACATATCCTGAGA--                                                             | ACACACTATGAAGAACCAGATTTTCATGATCAGTTTTT | ----- | ACAT |      |            |
| APOSTART_12_GEN (3398) |        | TAATCGAT | TGAAGAGT | CG   | AGAT | TGAGGATGAG | GACTATCAAGTT | GCT  | GAAGCTAACATAGAGG | TTACATATCCTGAGA--                                                             | ACACACT--GACGAACCAGATTTTCATGATCAGTTTTT | ----- | ACAT |      |            |
|                        |        |          |          |      |      |            |              |      |                  |                                                                               |                                        |       |      |      | Section 28 |

|                        |        |          |      |       |       |         |           |        |           |               |              |           |               |         | Section 28                                         |      |                                                     |
|------------------------|--------|----------|------|-------|-------|---------|-----------|--------|-----------|---------------|--------------|-----------|---------------|---------|----------------------------------------------------|------|-----------------------------------------------------|
|                        | (3619) | 3619     | 3630 | 3640  | 3650  | 3660    | 3670      | 3680   | 3690      | 3700          | 3710         | 3720      | 3730          | 3740    | 3752                                               |      |                                                     |
| APOSTART 1 (1337)      |        |          |      |       |       |         | AAGACTCCA | ACAAGT | CTGACAA   | TGATGCTAAGCGT | ACAG         |           |               |         |                                                    |      |                                                     |
| APOSTART 2 (1337)      |        |          |      |       |       |         | AAGACTCCA | ACAAGT | CTGACAA   | TGATGCTAAGCGT | ACAG         |           |               |         |                                                    |      |                                                     |
| APOSTART_3 (1337)      |        |          |      |       |       |         | AAGACTCCA | ACAAGT | CTGACAA   | TGATGCTAAGCGT | ACAG         |           |               |         |                                                    |      |                                                     |
| APOSTART_4 (1340)      |        |          |      |       |       |         | AAGACTCCA | CCAAGT | CTGACAA   | TGATGCTAAGCGT | ACAG         |           |               |         |                                                    |      |                                                     |
| APOSTART_5 (1337)      |        |          |      |       |       |         | AAGACTCCA | GTAAAG | CTGACAA   | C             | GATGCTAAGCGT | ACAG      |               |         |                                                    |      |                                                     |
| APOSTART_6 (1337)      |        |          |      |       |       |         | AAGACTCCA | ATAAAG | CTGACAA   | C             | GATGCTAAGCGT | ACAG      |               |         |                                                    |      |                                                     |
| APOSTART 7 (1340)      |        |          |      |       |       |         | AAGACTCCA | ACAAGT | CTGACAA   | TGATGCTAAGCGT | G            | CAAG      |               |         |                                                    |      |                                                     |
| APOSTART_8 (1313)      |        |          |      |       |       |         | AAGACTCCA | ACAAGT | CTGACAA   | TGATGCTAAGCGT | ACAG         |           |               |         |                                                    |      |                                                     |
| APOSTART_9 (1337)      |        |          |      |       |       |         | AAGACTCCA | ACAAGT | CTGACAA   | TGATGCTAAGCGT | ACAG         |           |               |         |                                                    |      |                                                     |
| APOSTART_10 (1322)     |        |          |      |       |       |         | AAGACTCCA | ACAAGT | CTGACAA   | TGATGCTAAGCGT | ACAG         |           |               |         |                                                    |      |                                                     |
| APOSTART_11 (1334)     |        |          |      |       |       |         | AAGACTCCA | ACAAGT | CTGACAA   | TGATGCTAAGCGT | ACAG         |           |               |         |                                                    |      |                                                     |
| APOSTART_12 (1340)     |        |          |      |       |       |         | AAGACTCCA | CCAAGT | CTGACAA   | TGATGCTAAGCGT | ACAG         |           |               |         |                                                    |      |                                                     |
| APOSTART_14 (1310)     |        |          |      |       |       |         | AAGACTCCA | CCAAGT | CTGACAA   | TGATGCTAAGCGT | ACAG         |           |               |         |                                                    |      |                                                     |
| APOSTART_15 (1406)     |        |          |      |       |       |         | AAGACTCCA | CCAAGT | CTGACAA   | TGATGCTAAGCGT | ACAG         |           |               |         |                                                    |      |                                                     |
| APOSTART_13 (1310)     |        |          |      |       |       |         | AAGACTCCA | CCAAGT | CTGACAA   | TGATGCTAAGCGT | ACAG         |           |               |         |                                                    |      |                                                     |
| APOSTART_1_GEN (3499)  |        | GTTTTTTT | CAC  | TTTCT | ATTAA | ACCATT  | TTAAAAA   | TAAAT  | GTACAGG   | AAGACTCCA     | ACAAGT       | CTGACAA   | TGATGCTAAGCGT | ACAG    | GTTTGATCCTTTCCGACAAATTACGTAAGCTGTCAAGTTCTTAGGATATA |      |                                                     |
| APOSTART_2_GEN (3482)  |        | GTTTTTTT | CAC  | TTTCT | ATTAA | ACCATT  | TTAAAAA   | TAAAT  | GTACAGG   | AAGACTCCA     | ACAAGT       | CTGACAA   | TGATGCTAAGCGT | ACAG    | GTTTGATCCTTTCCGAAAAATTACGTCAGCTGTCAAGTTCTTAGGATAGA |      |                                                     |
| APOSTART_5_GEN (3389)  |        | TTTCT    | CAC  | ATC   | ATA   | -ATAAAC | CTTTT     | ATC    | AAAATTAAT | GTGCAGG       | AAGACTCCA    | GTAAAG    | CTGACAA       | C       | GATGCTAAGCGT                                       | ACAG | GTTTGATTCCATGACACAAATAATGCCTGCTGTCAAGTGATGAGGATAGA  |
| APOSTART_6_GEN (3384)  |        | TTTCT    | TAC  | ATC   | ATA   | AGTAAA  | ACTTTT    | ATC    | AAAATTAAT | GTGCAGG       | AAGACTCCA    | ATAAAG    | CTGACAA       | C       | GATGCTAAGCGT                                       | ACAG | GTTTTTATTCCCTCACACAAATCATGCCTGATGTCAAGTGATGAGGATAGA |
| APOSTART_7_GEN (3547)  |        | GTTTTTTT | CAC  | TTT   | TAT   | ATTAA   | ATCTTT    | TTTTT  | AAA       | -TAAAT        | GTACAGG      | AAGACTCCA | ACAAGT        | CTGACAA | TGATGCTAAGCGT                                      | ACAG | GTTTGATCCTTTCCGACAAATCACATCAGCTGTCAAGTTCTTAGGATAGA  |
| APOSTART_8_GEN (3557)  |        | GTTTTTTT | CAC  | TTT   | TAT   | ATTAA   | ATCTTT    | TTTTT  | AAA       | -TAAAT        | GTACAGG      | AAGACTCCA | ACAAGT        | CTGACAA | TGATGCTAAGCGT                                      | ACAG | GTTTGATCCTTTCCGACAAATCACATCAGCTGTCAAGTTCTTAGGATAGA  |
| APOSTART_10_GEN (3497) |        | GTTTTTTT | CAC  | TTTCT | ATTAA | ACCATT  | TTAAAAA   | TAAAT  | GTACAGG   | AAGACTCCA     | ACAAGT       | CTGACAA   | TGATGCTAAGCGT | ACAG    | GTTTGATCCTTTCCGACAAATTACGTAAGCTGTCAAGTTCTTAGGATATA |      |                                                     |
| APOSTART_12_GEN (3511) |        | GTTTTTTT | CAC  | TTTCT | ATTAA | ACCATT  | TTAAAAA   | TAAAT  | GTACAGG   | AAGACTCCA     | CCAAGT       | CTGACAA   | TGATGCTAAGCGT | ACAG    | GTTTGATCCTTTCCGACAAATTACGTCAGCTGTCAAGTTCTTAGGATAGA |      |                                                     |



|                        | (3753) | 3753                                        | 3760  | 3770  | 3780  | 3790  | 3800  | 3810  | 3820   | 3830   | 3840   | 3850   | 3860                        | 3870                        | 3886 |                  |                  |      |                  |              |              |    |              |   |    |
|------------------------|--------|---------------------------------------------|-------|-------|-------|-------|-------|-------|--------|--------|--------|--------|-----------------------------|-----------------------------|------|------------------|------------------|------|------------------|--------------|--------------|----|--------------|---|----|
| APOSTART 1 (1376)      |        | -----                                       | ----- | ----- | ----- | ----- | AAGA  | A     | CCTCC  | AGAAAA | A      | ATTGAT | C                           | TGTCTTGCTTTTCGGGCATCCTTCATC | GTGA | CAC              | CGGATGAGAAAAGCCG | T    | AACT             | A            | TTGGACAGTACC | C  | GG           |   |    |
| APOSTART 2 (1376)      |        | -----                                       | ----- | ----- | ----- | ----- | AAGA  | A     | CCTCC  | AGAAAA | A      | ATTGAT | C                           | TGTCTTGCTTTTCGGGCATCCTTCATC | GTGA | CAC              | CGGATGAGAAAAGCCG | T    | AACT             | G            | TTGGACAGTACC | C  | GG           |   |    |
| APOSTART_3 (1376)      |        | -----                                       | ----- | ----- | ----- | ----- | AAGA  | A     | CCTCC  | AGAAAA | A      | ATTGAT | C                           | TGTCTTGCTTTTCGGGCATCCTTCATC | GTGA | CAC              | CGGATGAGAAAAGCCG | T    | AACT             | A            | TTGGACAGTACC | C  | GG           |   |    |
| APOSTART_4 (1379)      |        | -----                                       | ----- | ----- | ----- | ----- | AAGA  | A     | CCTCC  | GAAAAA | A      | ATTGAT | C                           | TGTCTTGCTTTTCGGGCATCCTTCATC | GTGA | CAC              | CGGATGAGAAAAGCCG | T    | AACT             | G            | TTGGACAGTACC | C  | GG           |   |    |
| APOSTART_5 (1376)      |        | -----                                       | ----- | ----- | ----- | ----- | AAGAG | CCTCC | AGAAAA | G      | ATTGAT | T      | TGTCTTGCTTTTCGGGCATCCTTCATC | GTGA                        | C    | CGGATGAGAAAAGCCG | C                | AACT | G                | TTGGACAGTACC | C            | GG |              |   |    |
| APOSTART_6 (1376)      |        | -----                                       | ----- | ----- | ----- | ----- | AAGAG | CCTCC | AGAAAA | G      | ATTGAT | T      | TGTCTTGCTTTTCGGGCATCCTTCATC | A                           | TGA  | C                | CGGATGAGAAAAGCCG | C    | AACT             | G            | TTGGACAGTACC | G  | GG           |   |    |
| APOSTART 7 (1379)      |        | -----                                       | ----- | ----- | ----- | ----- | AAGA  | A     | CCTCC  | AGAAAA | A      | ATTGAT | C                           | TGTCTTGCTTTTCGGGCATCCTTCATC | GTGA | C                | A                | T    | GATGAGAAAAGCCG   | T            | AACT         | G  | TTGGACAGTACC | T | GG |
| APOSTART_8 (1352)      |        | -----                                       | ----- | ----- | ----- | ----- | AAGA  | A     | CCTCC  | AGAAAA | A      | ATTGAT | C                           | TGTCTTGCTTTTCGGGCATCCTTCATC | GTGA | CAC              | CGGATGAGAAAAGCCG | T    | AACT             | A            | TTGGACAGTACC | C  | GG           |   |    |
| APOSTART_9 (1376)      |        | -----                                       | ----- | ----- | ----- | ----- | AAGA  | A     | CCTCC  | AGAAAA | A      | ATTGAT | C                           | TGTCTTGCTTTTCGGGCATCCTTCATC | GTGA | CAC              | CGGATGAGAAAAGCCG | T    | AACT             | A            | TTGGACAGTACC | C  | GG           |   |    |
| APOSTART_10 (1361)     |        | -----                                       | ----- | ----- | ----- | ----- | AAGA  | A     | CCTCC  | AGAAAA | A      | ATTGAT | C                           | TGTCTTGCTTTTCGGGCATCCTTCATC | GTGA | CAC              | CGGATGAGAAAAGCCG | T    | AACT             | A            | TTGGACAGTACC | C  | GG           |   |    |
| APOSTART_11 (1373)     |        | -----                                       | ----- | ----- | ----- | ----- | AAGA  | A     | CCTCC  | AGAAAA | A      | ATTGAT | C                           | TGTCTTGCTTTTCGGGCATCCTTCATC | GTGA | CAC              | CGGATGAGAAAAGCCG | T    | AACT             | A            | TTGGACAGTACC | C  | GG           |   |    |
| APOSTART_12 (1379)     |        | -----                                       | ----- | ----- | ----- | ----- | AAGA  | A     | CCTCC  | GAAAAA | A      | ATTGAT | C                           | TGTCTTGCTTTTCGGGCATCCTTCATC | GTGA | T                | A                | C    | CGGATGAGAAAAGCCG | T            | AACT         | G  | TTGGACAGTACC | C | GG |
| APOSTART_14 (1349)     |        | -----                                       | ----- | ----- | ----- | ----- | AAGA  | A     | CCTCC  | GAAAAA | A      | ATTGAT | C                           | TGTCTTGCTTTTCGGGCATCCTTCATC | GTGA | CAC              | CGGATGAGAAAAGCCG | T    | AACT             | G            | TTGGACAGTACC | C  | GG           |   |    |
| APOSTART_15 (1445)     |        | -----                                       | ----- | ----- | ----- | ----- | AAGA  | A     | CCTCC  | GAAAAA | A      | ATTGAT | C                           | TGTCTTGCTTTTCGGGCATCCTTCATC | GTGA | CAC              | CGGATGAGAAAAGCCG | T    | AACT             | G            | TTGGACAGTACC | C  | GG           |   |    |
| APOSTART_13 (1349)     |        | -----                                       | ----- | ----- | ----- | ----- | AAGA  | A     | CCTCC  | GAAAAA | A      | ATTGAT | C                           | TGTCTTGCTTTTCGGGCATCCTTCATC | GTGA | CAC              | CGGATGAGAAAAGCCG | T    | AACT             | G            | TTGGACAGTACC | C  | GG           |   |    |
| APOSTART_1_GEN (3633)  |        | TTTTATTTTTTCTTTAACGGCCGATATCTTTGCCGTGGCAG   |       |       |       |       | AAGA  | A     | CCTCC  | AGAAAA | A      | ATTGAT | C                           | TGTCTTGCTTTTCGGGCATCCTTCATC | GTGA | CAC              | CGGATGAGAAAAGCCG | T    | AACT             | A            | TTGGACAGTACC | C  | GG           |   |    |
| APOSTART_2_GEN (3616)  |        | TTTTATTTTTTCTTTAACGGCCGATATCTTTGC - GTGGCAG |       |       |       |       | AAGA  | A     | CCTCC  | AGAAAA | A      | ATTGAT | C                           | TGTCTTGCTTTTCGGGCATCCTTCATC | GTGA | CAC              | CGGATGAGAAAAGCCG | T    | AACT             | G            | TTGGACAGTACC | C  | GG           |   |    |
| APOSTART_5_GEN (3522)  |        | TGTTATTTTTTCTCTCTAACGCAATATATTATTTTTTGGCAG  |       |       |       |       | AAGAG | CCTCC | AGAAAA | G      | ATTGAT | T      | TGTCTTGCTTTTCGGGCATCCTTCATC | GTGA                        | C    | CGGATGAGAAAAGCCG | C                | AACT | G                | TTGGACAGTACC | C            | GG |              |   |    |
| APOSTART_6_GEN (3518)  |        | TGTTATTTTTTCTCTCTAACGCAATATATTATTTTTTGGCAG  |       |       |       |       | AAGAG | CCTCC | AGAAAA | G      | ATTGAT | T      | TGTCTTGCTTTTCGGGCATCCTTCATC | A                           | TGA  | C                | CGGATGAGAAAAGCCG | C    | AACT             | G            | TTGGACAGTACC | G  | GG           |   |    |
| APOSTART_7_GEN (3680)  |        | TTTTATTTTTTCTTTAACGGCCGATATCTTTGCCATGGAAG   |       |       |       |       | AAGA  | A     | CCTCC  | AGAAAA | A      | ATTGAT | C                           | TGTCTTGCTTTTCGGGCATCCTTCATC | GTGA | C                | A                | T    | GATGAGAAAAGCCG   | T            | AACT         | G  | TTGGACAGTACC | T | GG |
| APOSTART_8_GEN (3690)  |        | TTTTATTTTTTCTTTAACGGCCGATATCTTTGCCATGGAAG   |       |       |       |       | AAGA  | A     | CCTCC  | AGAAAA | A      | ATTGAT | C                           | TGTCTTGCTTTTCGGGCATCCTTCATC | GTGA | CAC              | CGGATGAGAAAAGCCG | T    | AACT             | A            | TTGGACAGTACC | C  | GG           |   |    |
| APOSTART_10_GEN (3631) |        | TTTTATTTTTTCTTTAACGGCCGATATCTTTGCCGTGGCAG   |       |       |       |       | AAGA  | A     | CCTCC  | AGAAAA | A      | ATTGAT | C                           | TGTCTTGCTTTTCGGGCATCCTTCATC | GTGA | CAC              | CGGATGAGAAAAGCCG | T    | AACT             | A            | TTGGACAGTACC | C  | GG           |   |    |
| APOSTART_12_GEN (3645) |        | TTTTATTTTTTCTTTAACGGCCGATATCTTTGC - ATGGCAG |       |       |       |       | AAGA  | A     | CCTCC  | GAAAAA | A      | ATTGAT | C                           | TGTCTTGCTTTTCGGGCATCCTTCATC | GTGA | T                | A                | C    | CGGATGAGAAAAGCCG | T            | AACT         | G  | TTGGACAGTACC | C | GG |

|                        | (3887) | 3887    | 3900 | 3910                                | 3920       | 3930                                                                                 | 3940  | 3950  | 3960  | 3970  | 3980  | 3990  | 4000  | 4010  | 4020  |
|------------------------|--------|---------|------|-------------------------------------|------------|--------------------------------------------------------------------------------------|-------|-------|-------|-------|-------|-------|-------|-------|-------|
| APOSTART 1 (1469)      |        | ATAGCAC | A    | CTCTTTAAAGTCCGTAGCAAGAACTTCCCTACTGA | TAAATCAAAG | -----                                                                                | ----- | ----- | ----- | ----- | ----- | ----- | ----- | ----- | ----- |
| APOSTART 2 (1469)      |        | ATAGCAC | A    | CTCTTTAAAGTCCGTAGCAAGAACTTCCCTACTGA | TAAATCAAAG | -----                                                                                | ----- | ----- | ----- | ----- | ----- | ----- | ----- | ----- | ----- |
| APOSTART_3 (1469)      |        | ATAGCAC | A    | CTCTTTAAAGTCCGTAGCAAGAACTTCCCTACTGA | TAAATCAAAG | -----                                                                                | ----- | ----- | ----- | ----- | ----- | ----- | ----- | ----- | ----- |
| APOSTART_4 (1472)      |        | ATAGCAC | A    | CTCTTTAAAGTCCGTAGCAAGAACTTCCCTACTGA | CAAATCAAAG | -----                                                                                | ----- | ----- | ----- | ----- | ----- | ----- | ----- | ----- | ----- |
| APOSTART_5 (1469)      |        | ATAGCAC | A    | CTCTTTAAAGTCCGTAGCAAGAACTTCCCTACTGA | TAAATCAAAG | -----                                                                                | ----- | ----- | ----- | ----- | ----- | ----- | ----- | ----- | ----- |
| APOSTART_6 (1469)      |        | ATAGCAC | G    | CTCTTTAAAGTCCGTAGCAAGAACTTCCCTACTGA | TAAATCAAAG | -----                                                                                | ----- | ----- | ----- | ----- | ----- | ----- | ----- | ----- | ----- |
| APOSTART 7 (1472)      |        | ATAGCAC | A    | CTCTTTAAAGTCCGTAGCAAGAACTTCCCTACTGA | TAAATCAAAG | -----                                                                                | ----- | ----- | ----- | ----- | ----- | ----- | ----- | ----- | ----- |
| APOSTART_8 (1445)      |        | ATAGCAC | A    | CTCTTTAAAGTCCGTAGCAAGAACTTCCCTACTGA | TAAATCAAAG | -----                                                                                | ----- | ----- | ----- | ----- | ----- | ----- | ----- | ----- | ----- |
| APOSTART_9 (1469)      |        | ATAGCAC | A    | CTCTTTAAAGTCCGTAGCAAGAACTTCCCTACTGA | TAAATCAAAG | -----                                                                                | ----- | ----- | ----- | ----- | ----- | ----- | ----- | ----- | ----- |
| APOSTART_10 (1454)     |        | ATAGCAC | A    | CTCTTTAAAGTCCGTAGCAAGAACTTCCCTACTGA | TAAATCAAAG | -----                                                                                | ----- | ----- | ----- | ----- | ----- | ----- | ----- | ----- | ----- |
| APOSTART_11 (1466)     |        | ATAGCAC | A    | CTCTTTAAAGTCCGTAGCAAGAACTTCCCTACTGA | TAAATCAAAG | -----                                                                                | ----- | ----- | ----- | ----- | ----- | ----- | ----- | ----- | ----- |
| APOSTART_12 (1472)     |        | ATAGCAC | A    | CTCTTTAAAGTCCGTAGCAAGAACTTCCCTACTGA | CAAATCAAAG | -----                                                                                | ----- | ----- | ----- | ----- | ----- | ----- | ----- | ----- | ----- |
| APOSTART_14 (1442)     |        | ATAGCAC | A    | CTCTTTAAAGTCCGTAGCAAGAACTTCCCTACTGA | CAAATCAAAG | -----                                                                                | ----- | ----- | ----- | ----- | ----- | ----- | ----- | ----- | ----- |
| APOSTART_15 (1538)     |        | ATAGCAC | A    | CTCTTTAAAGTCCGTAGCAAGAACTTCCCTACTGA | CAAATCAAAG | -----                                                                                | ----- | ----- | ----- | ----- | ----- | ----- | ----- | ----- | ----- |
| APOSTART_13 (1442)     |        | ATAGCAC | A    | CTCTTTAAAGTCCGTAGCAAGAACTTCCCTACTGA | CAAATCAAAG | -----                                                                                | ----- | ----- | ----- | ----- | ----- | ----- | ----- | ----- | ----- |
| APOSTART_1_GEN (3767)  |        | ATAGCAC | A    | CTCTTTAAAGTCCGTAGCAAGAACTTCCCTACTGA | TAAATCAAAG | GTCTAAATCTTCCAATTTATGCTTAATTTATTATGAAGAATATCTGATGAAGAAATTCAGGACACTCACATT - AAAGTTGC  |       |       |       |       |       |       |       |       |       |
| APOSTART_2_GEN (3749)  |        | ATAGCAC | A    | CTCTTTAAAGTCCGTAGCAAGAACTTCCCTACTGA | TAAATCAAAG | GTCTAAATCTTCCAATTTATGCTTAATTTATTATGAAGAATATCTGATGAGTAAATTCAGGACACTCACATT - AAAGTTGC  |       |       |       |       |       |       |       |       |       |
| APOSTART_5_GEN (3656)  |        | ATAGCAC | A    | CTCTTTAAAGTCCGTAGCAAGAACTTCCCTACTGA | TAAATCAAAG | GTCTAAATCTTCCAATTTATGCTTAGTCTACAATGAAGCATATTAGATAAATAAATTCAGGACACTGACATTTTAAGTTAT    |       |       |       |       |       |       |       |       |       |
| APOSTART_6_GEN (3652)  |        | ATAGCAC | G    | CTCTTTAAAGTCCGTAGCAAGAACTTCCCTACTGA | TAAATCAAAG | GTCTAAATCTTCCGTTTATGCTTAGTCTATAATGAAGCATATTAGAT - AAGAACTTCAGGACACTGACATTTTAAGTTAC   |       |       |       |       |       |       |       |       |       |
| APOSTART_7_GEN (3814)  |        | ATAGCAC | A    | CTCTTTAAAGTCCGTAGCAAGAACTTCCCTACTGA | TAAATCAAAG | GTCTAAATCTTCCAATTTATGCTTAATTTATTATGAAGAATATATGATGAAGAAATTCAGGACACTCACATT - AAAGTTGT  |       |       |       |       |       |       |       |       |       |
| APOSTART_8_GEN (3824)  |        | ATAGCAC | A    | CTCTTTAAAGTCCGTAGCAAGAACTTCCCTACTGA | TAAATCAAAG | GTCTAAATCTTCCAATTTATGCTTAATTTATTATGAAGAATATATGATGAAGAAATTCAGGACACTCACATT - AAAGTTGT  |       |       |       |       |       |       |       |       |       |
| APOSTART_10_GEN (3765) |        | ATAGCAC | A    | CTCTTTAAAGTCCGTAGCAAGAACTTCCCTACTGA | TAAATCAAAG | GTCTAAATCTTCCAATTTATGCTTAATTTATTATGAAGAATATCTGATGAAGAAATTCAGGACACTCACAT - - AAAGTTGC |       |       |       |       |       |       |       |       |       |
| APOSTART_12_GEN (3778) |        | ATAGCAC | A    | CTCTTTAAAGTCCGTAGCAAGAACTTCCCTACTGA | CAAATCAAAG | GTCTAAATCTTCCAATTTATGCTTAATTTATTATGAAGAATATCTGATGAATAAATTCAGGACACTCACATT - AAAGTTGC  |       |       |       |       |       |       |       |       |       |

|                        | (4021) | 4021      | 4030               | 4040           | 4050                                     | 4060                                    | 4070                | 4080                           | 4090  | 4100                          | 4110 | 4120 | 4130 | 4140 | 4154 |
|------------------------|--------|-----------|--------------------|----------------|------------------------------------------|-----------------------------------------|---------------------|--------------------------------|-------|-------------------------------|------|------|------|------|------|
| APOSTART 1 (1522)      | --     | ATACCTGC  | ACCAAGTTATCTCAT    | TGGAGCTTGCCGCA | ATTGACTGGTTTAAGGACACCAAGCGTATGGATAATGTT  | TGGCAGGCAGAAAGGTTGTGTTGCA               | CAGGT               |                                |       |                               |      |      |      |      |      |
| APOSTART 2 (1522)      | --     | ATACCTGC  | ACCAAGTTATCTCAT    | TGGAGCTTGCCGCA | ATTGACTGGTTTAAGGACACCAAGCGTATGGATAATGTT  | TGGCAGGCAGAAAGGTTGTGTTGCA               | CAGGT               |                                |       |                               |      |      |      |      |      |
| APOSTART_3 (1522)      | --     | ATACCTGC  | ACCAAGTTATCTCAT    | TGGAGCTTGCCGCA | ATTGACTGGTTTAAGGACACCAAGCGTATGGATAATGTT  | TGGCAGGCAGAAAGGTTGTGTTGCA               | CAGGT               |                                |       |                               |      |      |      |      |      |
| APOSTART_4 (1525)      | --     | ATACCTGC  | ACCAAGTTATCTCAT    | TGGAGCTTGCGCG  | GATTGACTGGTTTAAGGACACCAAGCGTATGGATAATGTT | TGGCAGGCAGAAAGGTTGTGTTGCA               | CAGGT               |                                |       |                               |      |      |      |      |      |
| APOSTART_5 (1522)      | --     | ATACCA    | AGCACCAAGTTATCTCAT | TGGAGCTCGCGCG  | GATTGACTGGTTTAAGGACACCAAGCGTATGGATAATGTT | CGGCAGGCAGAAAGGCTGTGTTGCT               | CAGGT               |                                |       |                               |      |      |      |      |      |
| APOSTART_6 (1522)      | --     | ATACCA    | AGCACCAAGTTATCTCAT | TGGAGCTCGCGCG  | GATTGACTGGTTTAAGGACACCAAGCGTATGGATAATGTT | CGGCAGGCAGAAAGGCTGTGTTGCT               | CAGGT               |                                |       |                               |      |      |      |      |      |
| APOSTART 7 (1525)      | --     | ATACCTGC  | ACCAAGTTATCTCAT    | TGGAGCTTGCCGCA | ATTGACTGGTTTAAGGACACCAAGCGTATGGATAATGTT  | TGGCAGGCAGAAAGGTTGC                     | GTTGCA              | CAGGT                          |       |                               |      |      |      |      |      |
| APOSTART_8 (1498)      | --     | ATACCTGC  | ACCAAGTTATCTCAT    | TGGAGCTTGCCGCA | ATTGACTGGTTTAAGGACACCAAGCGTATGGATAATGTT  | TGGCAGGCAGAAAGGTTGTGTTGCA               | CAGGT               |                                |       |                               |      |      |      |      |      |
| APOSTART_9 (1522)      | --     | ATACCTGC  | ACCAAGTTATCTCAT    | TGGAGCTTGCCGCA | ATTGACTGGTTTAAGGACACCAAGCGTATGGATAATGTT  | TGGCAGGCAGAAAGGTTGTGTTGCA               | CAGGT               |                                |       |                               |      |      |      |      |      |
| APOSTART_10 (1507)     | --     | ATACCTGC  | ACCAAGTTATCTCAT    | TGGAGCTTGCCGCA | ATTGACTGGTTTAAGGACACCAAGCGTATGGATAATGTT  | TGGCAGGCAGAAAGGTTGTGTTGCA               | CAGGT               |                                |       |                               |      |      |      |      |      |
| APOSTART_11 (1519)     | --     | ATACCTGC  | ACCAAGTTATCTCAT    | TGGAGCTTGCCGCA | ATTGACTGGTTTAAGGACACCAAGCGTATGGATAATGTT  | TGGCAGGCAGAAAGGTTGTGTTGCA               | CAGGT               |                                |       |                               |      |      |      |      |      |
| APOSTART_12 (1525)     | --     | ATACCTGC  | ACCAAGTTATCTCAT    | TGGAGCTTGCCGCG | GATTGACTGGTTTAAGGACACCAAGCGTATGGATAATGTT | TGGCAGGCAGAAAGGTTGTGTTGCA               | CAGGT               |                                |       |                               |      |      |      |      |      |
| APOSTART_14 (1495)     | --     | ATACCTGC  | ACCAAGTTATCTCAT    | TGGAGCTTGCGCG  | GATTGACTGGTTTAAGGACACCAAGCGTATGGATAATGTT | TGGCAGGCAGAAAGGTTGTGTTGCA               | CAGGT               |                                |       |                               |      |      |      |      |      |
| APOSTART_15 (1591)     | --     | ATGCCTGC  | ACCAAGTTATCTCAT    | TGGAGCTTGCGCG  | GATTGACTGGTTTAAGGACACCAAGCGTATGGATAATGTT | TGGCAGGCAGAAAGGTTGTGTTGCA               | CAGGT               |                                |       |                               |      |      |      |      |      |
| APOSTART_13 (1495)     | --     | ATACCTGC  | ACCAAGTTATCTCAT    | TGGAGCTTGCCGCG | GATTGACTGGTTTAAGGACACCAAGCGTATGGATAATGTT | TGGCAGGCAGAAAGGTTGTGTTGCA               | CAGGT               |                                |       |                               |      |      |      |      |      |
| APOSTART_1_GEN (3900)  | AG     | ATACCTGC  | ACCAAGTTATCTCAT    | TGGAGCTTGCCGCA | ATTGACTGGTTTAAGGACACCAAGCGTATGGATAATGTT  | TGGCAGGCAGAAAGGTTGTGTTGCA               | CAGGT               | AAACTTGATAATTTCTAGAAATATTTTCCT |       |                               |      |      |      |      |      |
| APOSTART_2_GEN (3882)  | AG     | ATACCTGCC | ACCAAGTTATCTCAT    | TGGAGCTTGCCGCA | ATTGACTGGTTTAAGGACACCAAGCGTATGGATAATGTT  | TGGCAGGCAGAAAGGTTGTGTTGCA               | CAGGT               | AAACTTGATAATTTCCAGTATATTTTCCT  |       |                               |      |      |      |      |      |
| APOSTART_5_GEN (3790)  | AG     | ATACCA    | AGCACCAAGTTATCTCAT | TGGAGCTCGCGCG  | GATTGACTGGTTTAAGGACACCAAGCGTATGGATAATGTT | CGGCAGGCAGAAAGGCTGTGTTGCT               | CAGGT               | AAACATGATGACTTACTACAAATTTCTT   |       |                               |      |      |      |      |      |
| APOSTART_6_GEN (3785)  | AG     | ATACCA    | AGCACCAAGTTATCTCAT | TGGAGCTCGCGCG  | GATTGACTGGTTTAAGGACACCAAGCGTATGGATAATGTT | CGGCAGGCAGAAAGGCTGTGTTGCT               | CAGGT               | AAACATGATGACTCACCACAAATTTCTT   |       |                               |      |      |      |      |      |
| APOSTART_7_GEN (3947)  | AG     | ATACCTGC  | ACCAAGTTATCTCA     | -GGAGCT-       | GCCGCA                                   | ATTGACTGGTTTAAGGACACCAAGCGTATGGATAATGTT | TGGCAGGCAGAAAGGTTGC | GTTGCA                         | CAGGT | AAACTTGATAATTTCCAGA-TATTTTCCT |      |      |      |      |      |
| APOSTART_8_GEN (3957)  | AG     | ATACCTGC  | ACCAAGTTATCTCAT    | TGGAGCTTGCCGCA | ATTGACTGGTTTAAGGACACCAAGCGTATGGATAATGTT  | TGGCAGGCAGAAAGGTTGTGTTGCA               | CAGGT               | AAACTTGATAATTTCCAGA-TATTTTCCT  |       |                               |      |      |      |      |      |
| APOSTART_10_GEN (3897) | AG     | ATACCTGC  | ACCAAGTTATCTCAT    | TGGAGCTTGCCGCA | ATTGACTGGTTTAAGGACACCAAGCGTATGGATAATGTT  | TGGCAGGCAGAAAGGTTGTGTTGCA               | CAGGT               | AAACTTGATAATTTCTAGAAATATTTTCCT |       |                               |      |      |      |      |      |
| APOSTART_12_GEN (3911) | AG     | ATACCTGC  | ACCAAGTTATCTCAT    | TGGAGCTTGCCGCG | GATTGACTGGTTTAAGGACACCAAGCGTATGGATAATGTT | TGGCAGGCAGAAAGGTTGTGTTGCA               | CAGGT               | AAACTTGATAATTTCCAGTATATTTTCCT  |       |                               |      |      |      |      |      |

|                        | (4155) | 4155             | 4160                     | 4170           | 4180                               | 4190                                | 4200                    | 4210                  | 4220 | 4230 | 4240 | 4250 | 4260 | 4270 | 4288 |
|------------------------|--------|------------------|--------------------------|----------------|------------------------------------|-------------------------------------|-------------------------|-----------------------|------|------|------|------|------|------|------|
| APOSTART 1 (1626)      | --     |                  |                          |                |                                    |                                     |                         |                       |      |      |      |      |      |      |      |
| APOSTART 2 (1626)      | --     |                  |                          |                |                                    |                                     |                         |                       |      |      |      |      |      |      |      |
| APOSTART_3 (1626)      | --     |                  |                          |                |                                    |                                     |                         |                       |      |      |      |      |      |      |      |
| APOSTART_4 (1629)      | --     |                  |                          |                |                                    |                                     |                         |                       |      |      |      |      |      |      |      |
| APOSTART_5 (1626)      | --     |                  |                          |                |                                    |                                     |                         |                       |      |      |      |      |      |      |      |
| APOSTART_6 (1626)      | --     |                  |                          |                |                                    |                                     |                         |                       |      |      |      |      |      |      |      |
| APOSTART 7 (1629)      | --     |                  |                          |                |                                    |                                     |                         |                       |      |      |      |      |      |      |      |
| APOSTART_8 (1602)      | --     |                  |                          |                |                                    |                                     |                         |                       |      |      |      |      |      |      |      |
| APOSTART_9 (1626)      | --     |                  |                          |                |                                    |                                     |                         |                       |      |      |      |      |      |      |      |
| APOSTART_10 (1611)     | --     |                  |                          |                |                                    |                                     |                         |                       |      |      |      |      |      |      |      |
| APOSTART_11 (1623)     | --     |                  |                          |                |                                    |                                     |                         |                       |      |      |      |      |      |      |      |
| APOSTART_12 (1629)     | --     |                  |                          |                |                                    |                                     |                         |                       |      |      |      |      |      |      |      |
| APOSTART_14 (1599)     | --     |                  |                          |                |                                    |                                     |                         |                       |      |      |      |      |      |      |      |
| APOSTART_15 (1695)     | --     |                  |                          |                |                                    |                                     |                         |                       |      |      |      |      |      |      |      |
| APOSTART_13 (1599)     | --     |                  |                          |                |                                    |                                     |                         |                       |      |      |      |      |      |      |      |
| APOSTART_1_GEN (4034)  | AAT    | --TTATCTTATTCTTG | TATTTATGCATTTTATTTTATTA  | AATATTATTTTCAA | AAGATCTCATTAACATTGTTA              | ATCTGACCATCCAATTTATGAGGCAGCATCTAGAA | CTATATAGTACTATTTCTCCT   |                       |      |      |      |      |      |      |      |
| APOSTART_2_GEN (4016)  | ATT    | --TTATCTTATTCTTG | TATTTATGCATTTTATTTTCTTAA | AATATTATTTTCAA | AAGATCTCATTAACATTGTGA              | ATCTGACCATCCAATTTACGAGGCAGCATCTAAA  | ATCTATATAGTACTATTTCTCCT |                       |      |      |      |      |      |      |      |
| APOSTART_5_GEN (3924)  | GCGC   | TTATCTTATTCTTG   | TATTTTGTATTTTCTTTTGTAA   | AATATCAATT-CAA | AATATCTCATTAACATTCT-----GAATC----- |                                     |                         |                       |      |      |      |      |      |      |      |
| APOSTART_6_GEN (3919)  | AGC    | --GTAAAAA        | ATTATCTTTTTCTTG          | TAGTTT-----    |                                    |                                     |                         |                       |      |      |      |      |      |      |      |
| APOSTART_7_GEN (4078)  | ATT    | --TTATCTTATTCTTG | TATTTGTGCATTTTATTTTCTTAA | AATATTATTTTCAA | AATATCTCATTAACATTGTGA              | ATCTGACACTCCAAC                     | TATGAAGCAGCATCTAGAA     | CTATATACTAGTATTTCTCCT |      |      |      |      |      |      |      |
| APOSTART_8_GEN (4090)  | ATT    | --TTATCTTATTCTTG | TATTTGTGCATTTTATTTTCTTAA | AATATTATTTTCAA | AATATCTCATTAACATTGTGA              | ATCTGACACTCCAAC                     | TATGAAGCAGCATCTAGAA     | CTATATACTAGTATTTCTCCT |      |      |      |      |      |      |      |
| APOSTART_10_GEN (4031) | AAT    | --TTATCTTATTCTTG | TATTTATGCATTTTATTTTATTA  | AATATTATTTTCAA | AAGATCTCATTAACATTGTTA              | ATCTGACCATCCAATTTATGAGGCAGCATCTAGAA | CTATATAG-ACTATTTCTCCT   |                       |      |      |      |      |      |      |      |
| APOSTART_12_GEN (4045) | ATT    | --TTATCTTATTCTTG | TATTTATGCATTTTATTTTCTTAA | AATATTATTTTCAA | AAGATCTCACTAACGTTGTGA              | ATCTGACCATCCAATTTATGAGGCAGCATCTAGAA | CTATATAGTACTATTTCTCCT   |                       |      |      |      |      |      |      |      |

|                        | (4289) | 4289                                                                                                                                       | 4300 | 4310 | 4320 | 4330 | 4340 | 4350 | 4360 | 4370 | 4380 | 4390 | 4400 | 4410 | 4422 |
|------------------------|--------|--------------------------------------------------------------------------------------------------------------------------------------------|------|------|------|------|------|------|------|------|------|------|------|------|------|
| APOSTART 1 (1626)      |        |                                                                                                                                            |      |      |      |      |      |      |      |      |      |      |      |      |      |
| APOSTART 2 (1626)      |        |                                                                                                                                            |      |      |      |      |      |      |      |      |      |      |      |      |      |
| APOSTART_3 (1626)      |        |                                                                                                                                            |      |      |      |      |      |      |      |      |      |      |      |      |      |
| APOSTART_4 (1629)      |        |                                                                                                                                            |      |      |      |      |      |      |      |      |      |      |      |      |      |
| APOSTART_5 (1626)      |        |                                                                                                                                            |      |      |      |      |      |      |      |      |      |      |      |      |      |
| APOSTART_6 (1626)      |        |                                                                                                                                            |      |      |      |      |      |      |      |      |      |      |      |      |      |
| APOSTART 7 (1629)      |        |                                                                                                                                            |      |      |      |      |      |      |      |      |      |      |      |      |      |
| APOSTART_8 (1602)      |        |                                                                                                                                            |      |      |      |      |      |      |      |      |      |      |      |      |      |
| APOSTART_9 (1626)      |        |                                                                                                                                            |      |      |      |      |      |      |      |      |      |      |      |      |      |
| APOSTART_10 (1611)     |        |                                                                                                                                            |      |      |      |      |      |      |      |      |      |      |      |      |      |
| APOSTART_11 (1623)     |        |                                                                                                                                            |      |      |      |      |      |      |      |      |      |      |      |      |      |
| APOSTART_12 (1629)     |        |                                                                                                                                            |      |      |      |      |      |      |      |      |      |      |      |      |      |
| APOSTART_14 (1599)     |        |                                                                                                                                            |      |      |      |      |      |      |      |      |      |      |      |      |      |
| APOSTART_15 (1695)     |        |                                                                                                                                            |      |      |      |      |      |      |      |      |      |      |      |      |      |
| APOSTART_13 (1599)     |        |                                                                                                                                            |      |      |      |      |      |      |      |      |      |      |      |      |      |
| APOSTART_1_GEN (4166)  |        | GTCGAGCAAGACCAGAACATAACAGTCTTTTTTTA-ATGAAAAGTGGCGCAGCCGCATCGTGCTTCACTATAGTACAAATTATCGTGTTAATAGCTCTATTTTTTTTTTTATTGAATGCTTAAGAGAGGTTTCACGAT |      |      |      |      |      |      |      |      |      |      |      |      |      |
| APOSTART_2_GEN (4148)  |        | GTCGAGCAAGACCAGAACATAACAGTCTTTTTTTT-ATGAAAAGTGGCACAGCCGCATCGTGCTTCGCTATAGTACAAATTATCGTGTTGATAGCTCTAATTTTTTTG-ATTGATTGCTTAAGAGAGATTTCATGAT  |      |      |      |      |      |      |      |      |      |      |      |      |      |
| APOSTART_5_GEN (4003)  |        | -----GATG-----                                                                                                                             |      |      |      |      |      |      |      |      |      |      |      |      |      |
| APOSTART_6_GEN (3950)  |        | -----TTGCATTTTCTTTGTAAATATCATTTCAATATATCTAATT-----                                                                                         |      |      |      |      |      |      |      |      |      |      |      |      |      |
| APOSTART_7_GEN (4210)  |        | GTCGAGCAAGACCAGAACATAACAGTCTTTTTTTTTATGAAAAGTGGCACAGCTGCATCGTGCTTCGCTATAGTACAAATTATCGTGTTGATAGCTCTAATTTTTTTG-ATTGAATGCTTAAGAGAGGTTTCACGAT  |      |      |      |      |      |      |      |      |      |      |      |      |      |
| APOSTART_8_GEN (4222)  |        | GTCGAGCAAGACCAGAACATAACAGTCTTTTTTTTTATGAAAAGTGGCACAGCTGCATCGTGCTTCGCTATAGTACAAATTATCGTGTTGATAGCTCTAATTTTTTTG-ATTGAATGCTTAAGAGAGGTTTCACGAT  |      |      |      |      |      |      |      |      |      |      |      |      |      |
| APOSTART_10_GEN (4162) |        | GTCGAGCAAGACCAGAACATAACAGTCTTTTTTTAATGAAAAGTGGCGCAGCCGCATCGTGCTTCACTATAGTACAAATTATCGTGTTAATAGCTCTATTTTTTTTTT-ATTGAATGCTTAAGAGAGGTTTCACGAT  |      |      |      |      |      |      |      |      |      |      |      |      |      |
| APOSTART_12_GEN (4177) |        | GTCGAGCAAGACCAGAACATAATAGTCTTTTTTTT-ATGAAAAGTGGCACAGCCGCATCGTGCTTCGCTATTGTACAAATTATCGTGTTGATAGCTCTAATTTTTTTG-ATTGAATGCTTAAGAGAGGTTTCACGAT  |      |      |      |      |      |      |      |      |      |      |      |      |      |

|                        | (4423) | 4423                                                                                                                                     | 4430 | 4440 | 4450 | 4460 | 4470 | 4480 | 4490 | 4500 | 4510 | 4520 | 4530 | 4540 | 4556 |
|------------------------|--------|------------------------------------------------------------------------------------------------------------------------------------------|------|------|------|------|------|------|------|------|------|------|------|------|------|
| APOSTART 1 (1626)      |        |                                                                                                                                          |      |      |      |      |      |      |      |      |      |      |      |      |      |
| APOSTART 2 (1626)      |        |                                                                                                                                          |      |      |      |      |      |      |      |      |      |      |      |      |      |
| APOSTART_3 (1626)      |        |                                                                                                                                          |      |      |      |      |      |      |      |      |      |      |      |      |      |
| APOSTART_4 (1629)      |        |                                                                                                                                          |      |      |      |      |      |      |      |      |      |      |      |      |      |
| APOSTART_5 (1626)      |        |                                                                                                                                          |      |      |      |      |      |      |      |      |      |      |      |      |      |
| APOSTART_6 (1626)      |        |                                                                                                                                          |      |      |      |      |      |      |      |      |      |      |      |      |      |
| APOSTART 7 (1629)      |        |                                                                                                                                          |      |      |      |      |      |      |      |      |      |      |      |      |      |
| APOSTART_8 (1602)      |        |                                                                                                                                          |      |      |      |      |      |      |      |      |      |      |      |      |      |
| APOSTART_9 (1626)      |        |                                                                                                                                          |      |      |      |      |      |      |      |      |      |      |      |      |      |
| APOSTART_10 (1611)     |        |                                                                                                                                          |      |      |      |      |      |      |      |      |      |      |      |      |      |
| APOSTART_11 (1623)     |        |                                                                                                                                          |      |      |      |      |      |      |      |      |      |      |      |      |      |
| APOSTART_12 (1629)     |        |                                                                                                                                          |      |      |      |      |      |      |      |      |      |      |      |      |      |
| APOSTART_14 (1599)     |        |                                                                                                                                          |      |      |      |      |      |      |      |      |      |      |      |      |      |
| APOSTART_15 (1695)     |        |                                                                                                                                          |      |      |      |      |      |      |      |      |      |      |      |      |      |
| APOSTART_13 (1599)     |        |                                                                                                                                          |      |      |      |      |      |      |      |      |      |      |      |      |      |
| APOSTART_1_GEN (4299)  |        | ATTATAACTTTTCAAATCATTTAGTACACTGAGAACAAGTATTACAGAAATTTAGCCAAATGTTTCAGATACCAATCAGAAACTCATGCTTGTTTCTGTCTGAAGTGTAAGACAAGAAAACCTGAGTCATTGTTCA |      |      |      |      |      |      |      |      |      |      |      |      |      |
| APOSTART_2_GEN (4280)  |        | ATTATAACTTTCAAATCATTTAGTACACTGAGAACAAGTATTACAGAAATTTAGCCAAATGTTTCAGATACCAATCAGAAACTCATGCTTG-----AAGTGTAAGACAAGAAAACCTGAGTCATTGTTCA       |      |      |      |      |      |      |      |      |      |      |      |      |      |
| APOSTART_5_GEN (4007)  |        | -----T-----TCTATCTGAAGAATAAGATAATAAAACCTGAGCCCTTGTTCA                                                                                    |      |      |      |      |      |      |      |      |      |      |      |      |      |
| APOSTART_6_GEN (3990)  |        | -----AACATTTCGGAATCTC-----TGTTTCTATCTGAAGAGAATAAAGCTGAGCCCTTGTTCA                                                                        |      |      |      |      |      |      |      |      |      |      |      |      |      |
| APOSTART_7_GEN (4343)  |        | ATTATAACTTTTCAAATCATTTAGTACACTGAGAACAAGTATTACAGAAATTTAGCCAAATGTTTCAGATACCAATCAGAAACTCATGCTTGTTTTTGTATGAAGTGTAAGACAAGAAAACCTGAGTCATTGTTCA |      |      |      |      |      |      |      |      |      |      |      |      |      |
| APOSTART_8_GEN (4355)  |        | ATTATAACTTTTCAAATCATTTAGTACACTGAGAACAAGTATTACAGAAATTTAGCCAAATGTTTCAGATACCAATCAGAAACTCATGCTTGTTTTTGTATGAAGTGTAAGACAAGAAAACCTGAGTCATTGTTCA |      |      |      |      |      |      |      |      |      |      |      |      |      |
| APOSTART_10_GEN (4295) |        | ATTATAACTTTTCAAATCATTTAGTACACTGAGAACAAGTATTACAGAAATTTAGCCAAATGTTTCAGATACCAATCAGAAACTCATGCTTGTTTCTGTCTGAAGTGTAAGACAAGAAAACCTGAGTCATTGTTCA |      |      |      |      |      |      |      |      |      |      |      |      |      |
| APOSTART_12_GEN (4309) |        | ATTATAACTTTTCAAATCATTTAGTACACTGAGAACAAGTATTACAGAAATTTAGCCAAATGTTTCAGACACCAATCAGAAACTCATGCTTGTTTCTGTCTGAAGTGTAAGACAAGAAAACCTGAGTCATTGTTCA |      |      |      |      |      |      |      |      |      |      |      |      |      |

|                        | (4557)                              | 4557  | 4570        | 4580                         | 4590                                                        | 4600        | 4610                         | 4620  | 4630  | 4640  | 4650  | 4660  | 4670  | 4680  | 4690  |
|------------------------|-------------------------------------|-------|-------------|------------------------------|-------------------------------------------------------------|-------------|------------------------------|-------|-------|-------|-------|-------|-------|-------|-------|
| APOSTART 1 (1626)      |                                     | ----- | -----       | -----                        | TGCT                                                        | GCTGAGAAAGG | GATGCACACATTTGTTGCCAACATACAG | ----- | ----- | ----- | ----- | ----- | ----- | ----- | ----- |
| APOSTART 2 (1626)      |                                     | ----- | -----       | -----                        | TGCT                                                        | GCTGAGAAAGG | GATGCACACATTTGTTGCCAACATACAG | ----- | ----- | ----- | ----- | ----- | ----- | ----- | ----- |
| APOSTART_3 (1626)      |                                     | ----- | -----       | -----                        | TGCT                                                        | GCTGAGAAAGG | GATGCACACATTTGTTGCCAACATACAG | ----- | ----- | ----- | ----- | ----- | ----- | ----- | ----- |
| APOSTART_4 (1629)      |                                     | ----- | -----       | -----                        | TGCT                                                        | GCTGAGAAAGG | GATGCACACATTTGTTGCCAACATACAG | ----- | ----- | ----- | ----- | ----- | ----- | ----- | ----- |
| APOSTART_5 (1626)      |                                     | ----- | -----       | -----                        | TGCT                                                        | GCTGAGAAAGG | GATGCACACATTTGTTGCCAACATACAG | ----- | ----- | ----- | ----- | ----- | ----- | ----- | ----- |
| APOSTART_6 (1626)      |                                     | ----- | -----       | -----                        | TGCT                                                        | GCTGAGAAAGG | GATGCACACATTTGTTGCCAACATACAG | ----- | ----- | ----- | ----- | ----- | ----- | ----- | ----- |
| APOSTART 7 (1629)      |                                     | ----- | -----       | -----                        | TGCT                                                        | GCTGAGAAAGG | GATGCACACATTTGTTGCCAACATACAG | ----- | ----- | ----- | ----- | ----- | ----- | ----- | ----- |
| APOSTART_8 (1602)      |                                     | ----- | -----       | -----                        | TGCT                                                        | GCTGAGAAAGG | GATGCACACATTTGTTGCCAACATACAG | ----- | ----- | ----- | ----- | ----- | ----- | ----- | ----- |
| APOSTART_9 (1626)      |                                     | ----- | -----       | -----                        | TGCT                                                        | GCTGAGAAAGG | GATGCACACATTTGTTGCCAACATACAG | ----- | ----- | ----- | ----- | ----- | ----- | ----- | ----- |
| APOSTART_10 (1611)     |                                     | ----- | -----       | -----                        | TGCT                                                        | GCTGAGAAAGG | GATGCACACATTTGTTGCCAACATACAG | ----- | ----- | ----- | ----- | ----- | ----- | ----- | ----- |
| APOSTART_11 (1623)     |                                     | ----- | -----       | -----                        | TGCT                                                        | GCTGAGAAAGG | GATGCACACATTTGTTGCCAACATACAG | ----- | ----- | ----- | ----- | ----- | ----- | ----- | ----- |
| APOSTART_12 (1629)     |                                     | ----- | -----       | -----                        | TGCT                                                        | GCTGAGAAAGG | GATGCACACATTTGTTGCCAACATACAG | ----- | ----- | ----- | ----- | ----- | ----- | ----- | ----- |
| APOSTART_14 (1599)     |                                     | ----- | -----       | -----                        | TGCT                                                        | GCTGAGAAAGG | GATGCACACATTTGTTGCCAACATACAG | ----- | ----- | ----- | ----- | ----- | ----- | ----- | ----- |
| APOSTART_15 (1695)     |                                     | ----- | -----       | -----                        | TGCT                                                        | GCTGAGAAAGG | GATGCACACATTTGTTGCCAACATACAG | ----- | ----- | ----- | ----- | ----- | ----- | ----- | ----- |
| APOSTART_13 (1599)     |                                     | ----- | -----       | -----                        | TGCT                                                        | GCTGAGAAAGG | GATGCACACATTTGTTGCCAACATACAG | ----- | ----- | ----- | ----- | ----- | ----- | ----- | ----- |
| APOSTART_1_GEN (4433)  | TAATTTTCATTGCTCATATTACCTGCTTCGTAGGT | TGCT  | GCTGAGAAAGG | GATGCACACATTTGTTGCCAACATACAG | GTGAGCTATTCCGCTATAAAATTTTCATTGTACTGTTATTCCTGCATTTGAAGACTGGT |             |                              |       |       |       |       |       |       |       |       |
| APOSTART_2_GEN (4404)  | TAATTTTCATTGCTCA-----CCTGCTTTGTAGGT | TGCT  | GCTGAGAAAGG | GATGCACACATTTGTTGCCAACATACAG | GTGAGCTATTCCGCTATAAAATTTTCATTGTACTGTTATTCCTGCGTTTGAAGACTGGT |             |                              |       |       |       |       |       |       |       |       |
| APOSTART_5_GEN (4049)  | TACTT-CATTGCTCATGTTACTGTCTTTGTAGGT  | TGCT  | GCTGAGAAAGG | GATGCACACATTTGTTGCCAACATACAG | GCGAGTTATTCTGCGATAGATATCTTTGTAATATTATTTCATGCGTTTGAAGGCTAGT  |             |                              |       |       |       |       |       |       |       |       |
| APOSTART_6_GEN (4044)  | TAATTTTCATTGCTCATGTTACTGGCTTTGTAGGT | TGCT  | GCTGAGAAAGG | GATGCACACATTTGTTGCCAACATACAG | GCGAGTTATTCTGTGATAGATTTGTTTGAAATATTATTAATGTGTTTGTAGAATAGT   |             |                              |       |       |       |       |       |       |       |       |
| APOSTART_7_GEN (4477)  | AAATTTAATTGCTCATGTTACCTGCTTTGTAGGT  | TGCT  | GCTGAGAAAGG | GATGCACACATTTGTTGCCAACATACAG | GTGAGCTATTCCGCTATAAAATTTTCATTGTACTGTTATTCATGCGTTTGAAGACTGGT |             |                              |       |       |       |       |       |       |       |       |
| APOSTART_8_GEN (4489)  | AAATTTAATTGCTCATGTTACCTGCTTTGTAGGT  | TGCT  | GCTGAGAAAGG | GATGCACACATTTGTTGCCAACATACAG | GTGAGCTATTCCGCTATAAAATTTTCATTGTACTGTTATTCATGCGTTTGAAGACTGGT |             |                              |       |       |       |       |       |       |       |       |
| APOSTART_10_GEN (4429) | TAATTTTCATTGCTCATATTACCTGCTTCGTAGGT | TGCT  | GCTGAGAAAGG | GATGCACACATTTGTTGCCAACATACAG | GTGAGCTATTCCGCTATAAAATTTTCATTGTACTGTTATTCCTGCATTTGAAGACTGGT |             |                              |       |       |       |       |       |       |       |       |
| APOSTART_12_GEN (4443) | TAATTTTCATTGCTCATATTACCTGCTTTGTAGGT | TGCT  | GCTGAGAAAGG | GATGCACACATTTGTTGCCAACATACAG | GTGAGCTATTCCGCTATCAATTTTCATTGTACTGTTATTCCTGCGTTTGAAGACTGGT  |             |                              |       |       |       |       |       |       |       |       |

|                        | (4691)                                                                       | 4691  | 4700                                           | 4710         | 4720 | 4730 | 4740 | 4750 | 4760 | 4770 | 4780 | 4790 | 4800 | 4810 | 4824 |
|------------------------|------------------------------------------------------------------------------|-------|------------------------------------------------|--------------|------|------|------|------|------|------|------|------|------|------|------|
| APOSTART 1 (1669)      |                                                                              | ATTCC | GGATCAACTCATTACAGCTTGGTGATGTATTTTCGTCACGAGTTG  | CATGAAAAAAGG |      |      |      |      |      |      |      |      |      |      |      |
| APOSTART 2 (1669)      |                                                                              | ATTCC | GGATCAACTCATTACAGCTTGGTGATGTATTTTCGTCACGAGTTCC | CATGAAAAAAGG |      |      |      |      |      |      |      |      |      |      |      |
| APOSTART_3 (1669)      |                                                                              | ATTCC | GGATCAACTCATTACAGCTTGGTGATGTATTTTCGTCACGAGTTG  | CATGAAAAAAGG |      |      |      |      |      |      |      |      |      |      |      |
| APOSTART_4 (1672)      |                                                                              | ATTCC | GGATCAACTCATTACAGCTTGGTGATGTATTTTCGTCACGAGTTCC | CATGAAAAAAGG |      |      |      |      |      |      |      |      |      |      |      |
| APOSTART_5 (1669)      |                                                                              | ATTCC | GGATCAACTCATTACAGCTTGGTGATGTATTTTCGTCACGAGTACC | CATGAAAAAAGG |      |      |      |      |      |      |      |      |      |      |      |
| APOSTART_6 (1669)      |                                                                              | ATTCC | GGATCAACTCATTACAGCTTGGTGATGTATTTTCGTCACGAGTACC | CATGAAAAAAGG |      |      |      |      |      |      |      |      |      |      |      |
| APOSTART 7 (1672)      |                                                                              | ATTCC | GGATCAACTCATTACAGCTTGGTGATGTATTTTCGTCACGAGTTCC | CATGAAAAAAGG |      |      |      |      |      |      |      |      |      |      |      |
| APOSTART_8 (1645)      |                                                                              | ATTCC | GGATCAACTCATTACAGCTTGGTGATGTATTTTCGTCACGAGTTG  | CATGAAAAAAGG |      |      |      |      |      |      |      |      |      |      |      |
| APOSTART_9 (1669)      |                                                                              | ATTCC | GGATCAACTCATTACAGCTTGGTGATGTATTTTCGTCACGAGTTG  | CATGAAAAAAGG |      |      |      |      |      |      |      |      |      |      |      |
| APOSTART_10 (1654)     |                                                                              | ATTCC | GGATCAACTCATTACAGCTTGGTGATGTATTTTCGTCACGAGTTG  | CATGAAAAAAGG |      |      |      |      |      |      |      |      |      |      |      |
| APOSTART_11 (1666)     |                                                                              | ATTCC | GGATCAACTCATTACAGCTTGGTGATGTATTTTCGTCACGAGTTG  | CATGAAAAAAGG |      |      |      |      |      |      |      |      |      |      |      |
| APOSTART_12 (1672)     |                                                                              | ATTCC | GGATCAACTCATTACAGCTTGGTGATGTATTTTCGTCACGAGTTCC | CATGAAAAAAGG |      |      |      |      |      |      |      |      |      |      |      |
| APOSTART_14 (1642)     |                                                                              | ATTCC | GGATCAACTCATTACAGCTTGGTGATGTATTTTCGTCACGAGTTCC | CATGAAAAAAGG |      |      |      |      |      |      |      |      |      |      |      |
| APOSTART_15 (1738)     |                                                                              | ATTCC | GGATCAACTCATTACAGCTTGGTGATGTATTTTCGTCACGAGTTCC | CATGAAAAAAGG |      |      |      |      |      |      |      |      |      |      |      |
| APOSTART_13 (1642)     |                                                                              | ATTCC | GGATCAACTCATTACAGCTTGGTGATGTATTTTCGTCACGAGTTCC | CATGAAAAAAGG |      |      |      |      |      |      |      |      |      |      |      |
| APOSTART_1_GEN (4567)  | ATATATCCAACCTTTTTTTTTTCGAAAGGAAAGA-TTTTTTTTGGGAAGTTAATTAACCTTAATATCCTATTGCAG | ATTCC | GGATCAACTCATTACAGCTTGGTGATGTATTTTCGTCACGAGTTG  | CATGAAAAAAGG |      |      |      |      |      |      |      |      |      |      |      |
| APOSTART_2_GEN (4533)  | ATATATCAAACCTTTTTTTTTTCGAAAGGAAAGA-TTTTTTGGTGAAGTTAATTAACCTTAATATCCTATTGCAG  | ATTCC | GGATCAACTCATTACAGCTTGGTGATGTATTTTCGTCACGAGTTCC | CATGAAAAAAGG |      |      |      |      |      |      |      |      |      |      |      |
| APOSTART_5_GEN (4182)  | GTT---GAACTTTTTTTCCAAAAGGAAACA---TGTTTGGTGAAGTTAAT-----ATCCCATTTGCAG         | ATTCC | GGATCAACTCATTACAGCTTGGTGATGTATTTTCGTCACGAGTACC | CATGAAAAAAGG |      |      |      |      |      |      |      |      |      |      |      |
| APOSTART_6_GEN (4178)  | GTT---GAACTTTTTTTCCAAAATGAAACA---TGTTTGGTGAAGTTAAT-----ATCCCATTTGCAG         | ATTCC | GGATCAACTCATTACAGCTTGGTGATGTATTTTCGTCACGAGTACC | CATGAAAAAAGG |      |      |      |      |      |      |      |      |      |      |      |
| APOSTART_7_GEN (4611)  | ATATATCAAACCTTTTTTTTTTGAAAGGAGAGA---TTTTTTGGTGAAGTTAATTAACCTTAATATCCTATTGCAG | ATTCC | GGATCAACTCATTACAGCTTGGTGATGTATTTTCGTCACGAGTTCC | CATGAAAAAAGG |      |      |      |      |      |      |      |      |      |      |      |
| APOSTART_8_GEN (4623)  | ATATATCAAACCTTTTTTTTTTGAAAGGAGAGA---TTTTTTGKKGAAGTTAATTAACCTTAATATCCTATTGCAG | ATTCC | GGATCAACTCATTACAGCTTGGTGATGTATTTTCGTCACGAGTTG  | CATGAAAAAAGG |      |      |      |      |      |      |      |      |      |      |      |
| APOSTART_10_GEN (4563) | ATATATCCAACCTTTTTTTTTTCGAAAGGAAAGATTTTTTTTGGTGAAGTTAATTAACCTTAATATCCTATTGCAG | ATTCC | GGATCAACTCATTACAGCTTGGTGATGTATTTTCGTCACGAGTTG  | CATGAAAAAAGG |      |      |      |      |      |      |      |      |      |      |      |
| APOSTART_12_GEN (4577) | ATATATCAAACCTTTTTTTTTTGAAAGGAGAGA---TTTTTTGGTGAAGTTAATTAACCTTAATATCCTATTGCAG | ATTCC | GGATCAACTCATTACAGCTTGGTGATGTATTTTCGTCACGAGTTCC | CATGAAAAAAGG |      |      |      |      |      |      |      |      |      |      |      |

|                        | (4825) | 4825                   | 4830 | 4840                    | 4850   | 4860         | 4870 | 4880       | 4890                                                       | 4900  | 4910  | 4920  | 4930  | 4940  | 4958  |
|------------------------|--------|------------------------|------|-------------------------|--------|--------------|------|------------|------------------------------------------------------------|-------|-------|-------|-------|-------|-------|
| APOSTART 1 (1731)      |        | ATCATTGCTGCAACGTTTCTTT | TGAC | GGAGATGATGAATTCCGCAATAG | CAGACT | AAAGCTTATACC | AGCC | GTTCCAAAGG | -----                                                      | ----- | ----- | ----- | ----- | ----- | ----- |
| APOSTART 2 (1731)      |        | ATCATTGCTGCAACGTTTCTTT | TGAT | GGAGATGATGAATTCCGCAATAG | CAGACT | AAAGCTTATACC | AGCC | GTTCCAAAGG | -----                                                      | ----- | ----- | ----- | ----- | ----- | ----- |
| APOSTART_3 (1731)      |        | ATCATTGCTGCAACGTTTCTTT | TGAC | GGAGATGATGAATTCCGCAATAG | CAGACT | AAAGCTTATACC | AGCC | GTTCCAAAGG | -----                                                      | ----- | ----- | ----- | ----- | ----- | ----- |
| APOSTART_4 (1734)      |        | ATCATTGCTGCAACGTTTCTTT | TGAC | GGAGATGATGAATTCCGCAATAG | CAGACT | GAAGCTTATACC | AGCC | GTTCCAAAGG | -----                                                      | ----- | ----- | ----- | ----- | ----- | ----- |
| APOSTART_5 (1731)      |        | ATCATTGCTGCAACGTTTCTTT | TGAT | GGAGATGATGAATTCCGCAATAG | TAGACT | GAAGCTTATACC | AGCC | GTTCCAAAGG | -----                                                      | ----- | ----- | ----- | ----- | ----- | ----- |
| APOSTART_6 (1731)      |        | ATCATTGCTGCAACGTTTCTTT | CGAC | GGAGATGATGAATTCCGCAATAG | TAGACT | CAAGCTTATACC | AGCC | GTTCCAAAGG | -----                                                      | ----- | ----- | ----- | ----- | ----- | ----- |
| APOSTART 7 (1734)      |        | ATCATTGCTGCAACGTTTCTTT | TGAC | GGAGATGATGAATTCCGCAATAG | CAGACT | GAAGCTTATACC | AGCC | GTTCCAAAGG | -----                                                      | ----- | ----- | ----- | ----- | ----- | ----- |
| APOSTART_8 (1707)      |        | ATCATTGCTGCAACGTTTCTTT | TGAC | GGAGATGATGAATTCCGCAATAG | CAGACT | AAAGCTTATACC | AGCC | GTTCCAAAGG | -----                                                      | ----- | ----- | ----- | ----- | ----- | ----- |
| APOSTART_9 (1731)      |        | ATCATTGCTGCAACGTTTCTTT | TGAC | GGAGATGATGAATTCCGCAATAG | CAGACT | AAAGCTTATACC | AGCC | GTTCCAAAGG | -----                                                      | ----- | ----- | ----- | ----- | ----- | ----- |
| APOSTART_10 (1716)     |        | ATCATTGCTGCAACGTTTCTTT | TGAC | GGAGATGATGAATTCCGCAATAG | CAGACT | AAAGCTTATACC | AGCC | GTTCCAAAGG | -----                                                      | ----- | ----- | ----- | ----- | ----- | ----- |
| APOSTART_11 (1728)     |        | ATCATTGCTGCAACGTTTCTTT | TGAC | GGAGATGATGAATTCCGCAATAG | CAGACT | AAAGCTTATACC | AGCC | GTTCCAAAGG | -----                                                      | ----- | ----- | ----- | ----- | ----- | ----- |
| APOSTART_12 (1734)     |        | ATCATTGCTGCAACGTTTCTTT | TGAC | GGAGATGATGAATTCCGCAATAG | CAGACT | GAAGCTTATACC | AGCC | GTTCCAAAGG | -----                                                      | ----- | ----- | ----- | ----- | ----- | ----- |
| APOSTART_14 (1704)     |        | ATCATTGCTGCAACGTTTCTTT | TGAC | GGAGATGATGAATTCCGCAATAG | CAGACT | GAAGCTTATACC | AGCC | GTTCCAAAGG | -----                                                      | ----- | ----- | ----- | ----- | ----- | ----- |
| APOSTART_15 (1800)     |        | ATCATTGCTGCAACGTTTCTTT | TGAC | GGAGATGATGAATTCCGCAATAG | CAGACT | GAAGCTTATACC | AGCC | GTTCCAAAGG | -----                                                      | ----- | ----- | ----- | ----- | ----- | ----- |
| APOSTART_13 (1704)     |        | ATCATTGCTGCAACGTTTCTTT | TGAC | GGAGATGATGAATTCCGCAATAG | CAGACT | GAAGCTTATACC | AGCC | GTTCCAAAGG | -----                                                      | ----- | ----- | ----- | ----- | ----- | ----- |
| APOSTART_1_GEN (4700)  |        | ATCATTGCTGCAACGTTTCTTT | TGAC | GGAGATGATGAATTCCGCAATAG | CAGACT | AAAGCTTATACC | AGCC | GTTCCAAAGG | TCTGTTTTTTTTTCTTCATAAACTCATGTGTGGGATGCAAAAAAAAAAAAAAATCT   |       |       |       |       |       |       |
| APOSTART_2_GEN (4666)  |        | ATCATTGCTGCAACGTTTCTTT | TGAT | GGAGATGATGAATTCCGCAATAG | CAGACT | AAAGCTTATACC | AGCC | GTTCCAAAGG | TCTGTTTTTTTTTCTTCATAAACTCATGTGGGATGCAAAAAAAAAAAAAAATTACTCT |       |       |       |       |       |       |
| APOSTART_5_GEN (4299)  |        | ATCATTGCTGCAACGTTTCTTT | TGAT | GGAGATGATGAATTCCGCAATAG | TAGACT | GAAGCTTATACC | AGCC | GTTCCAAAGG | TCTGCTTTTTTTTCAATAAAAA--CATGTACGCTGCAACTATTATGTTGTACTCT    |       |       |       |       |       |       |
| APOSTART_6_GEN (4295)  |        | ATCATTGCTGCAACGTTTCTTT | CGAC | GGAGATGATGAATTCCGCAATAG | TAGACT | CAAGCTTATACC | AGCC | GTTCCAAAGG | TATGTTTTTTTCCCATAAAAAACATGTAGGGT-----GATG                  |       |       |       |       |       |       |
| APOSTART_7_GEN (4742)  |        | ATCATTGCTGCAACGTTTCTTT | TGAC | GGAGATGATGAATTCCGCAATAG | CAGACT | GAAGCTTATACC | AGCC | GTTCCAAAGG | TCTTTTTTTTTTCTTCATAAACTCATGTG--GGATGCAAAAAAAAAAATTTACTTTT  |       |       |       |       |       |       |
| APOSTART_8_GEN (4754)  |        | ATCATTGCTGCAACGTTTCTTT | TGAC | GGAGATGATGAATTCCGCAATAG | CAGACT | AAAGCTTATACC | AGCC | GTTCCAAAGG | TCTTTTTTTTTTCTTCATAAACTCATGTG--GGATGCAAAAAAAAAAATTTACTTTT  |       |       |       |       |       |       |
| APOSTART_10_GEN (4697) |        | ATCATTGCTGCAACGTTTCTTT | TGAC | GGAGATGATGAATTCCGCAATAG | CAGACT | AAAGCTTATACC | AGCC | GTTCCAAAGG | TCTGTTTTTTTTTCTTCATAAACTCATGTGT-GGGATGCAAAAAAAAAAAAAATCT   |       |       |       |       |       |       |
| APOSTART_12_GEN (4708) |        | ATCATTGCTGCAACGTTTCTTT | TGAC | GGAGATGATGAATTCCGCAATAG | CAGACT | GAAGCTTATACC | AGCC | GTTCCAAAGG | TCTTTTTTTTTTCTTCATAAACTCATGTG--GGATGCAAAAAAAAAAATTTACTTTT  |       |       |       |       |       |       |

|                        | (4959) | 4959                                          | 4970   | 4980                 | 4990  | 5000                       | 5010   | 5020                     | 5030 | 5040                       | 5050 | 5060                     | 5070 | 5080 | 5092 |
|------------------------|--------|-----------------------------------------------|--------|----------------------|-------|----------------------------|--------|--------------------------|------|----------------------------|------|--------------------------|------|------|------|
| APOSTART 1 (1811)      |        | -----                                         | -----  | -----                | ----- | -----                      | GCTCAT | TGGATAGTGCGGCAGAGCGT     | TGGA | AGTACCCCTTGTTTATTGGGAAAGGC | GGT  | CGATTGCAGCTACGTGCGTGGTCC | AGGT | TAC  |      |
| APOSTART 2 (1811)      |        | -----                                         | -----  | -----                | ----- | -----                      | GCTCAT | TGGATAGTGCGGCAGAGCGT     | TGGA | AGTACCCCTTGTTTATTGGGAAAGGC | GGT  | CGATTGCAGCTACGTGCGTGGTCC | AGGT | TAC  |      |
| APOSTART_3 (1811)      |        | -----                                         | -----  | -----                | ----- | -----                      | GCTCAT | TGGATAGTGCGGCAGAGCGT     | TGGA | AGTACCCCTTGTTTATTGGGAAAGGC | GGT  | CGATTGCAGCTACGTGCGTGGTCC | AGGT | TAC  |      |
| APOSTART_4 (1814)      |        | -----                                         | -----  | -----                | ----- | -----                      | GCTCAT | TGGATAGTGCGGCAGAGCGT     | TGGA | AGTACCCCTTGTTTATTGGGAAAGGC | GGT  | TGATTGCAGCTACGTGCGTGGTCC | GGGT | TAC  |      |
| APOSTART_5 (1811)      |        | -----                                         | -----  | -----                | ----- | -----                      | GATCT  | TGGATAGTGCGGCAGAGCGT     | TGG  | AGTACCCCTTGTTTATTGGGAAAGGC | CGT  | CGATTGCAGCTACGTGCGTGGTCC | AGGG | TAC  |      |
| APOSTART_6 (1811)      |        | -----                                         | -----  | -----                | ----- | -----                      | GATCT  | TGGATAGTGCGGCAGAGCGT     | CGG  | AGTACCCCTTGTTTATTGGGAAAGGC | CGT  | CGATTGCAGCTACGTGCGTGGTCC | AGGT | TAC  |      |
| APOSTART 7 (1814)      |        | -----                                         | -----  | -----                | ----- | -----                      | GCTCAT | TGGATAGTGCGGCAGAGCGT     | TGGA | AGTACCCCTTGTTTATTGGGAAAGGC | GGT  | CGATTGCAGCTACGTGCGTGGTCC | GGGT | TAC  |      |
| APOSTART_8 (1787)      |        | -----                                         | -----  | -----                | ----- | -----                      | GCTCAT | TGGATAGTGCGGCAGAGCGT     | TGGA | AGTACCCCTTGTTTATTGGGAAAGGC | AGT  | CGATTGCAGCTACGTGCGTGGTCC | AGGT | TAC  |      |
| APOSTART_9 (1811)      |        | -----                                         | -----  | -----                | ----- | -----                      | GCTCAT | TGGATAGTGCGGCAGAGCGT     | TGGA | AGTACCCCTTGTTTATTGGGAAAGGC | AGT  | CGATTGCAGCTACGTGCGTGGTCC | AGGT | TAC  |      |
| APOSTART_10 (1796)     |        | -----                                         | -----  | -----                | ----- | -----                      | GCTCAT | TGGATAGTGCGGCAGAGCGT     | TGGA | AGTACCCCTTGTTTATTGGGAAAGGC | AGT  | CGATTGCAGCTACGTGCGTGGTCC | AGGT | TAC  |      |
| APOSTART_11 (1808)     |        | -----                                         | -----  | -----                | ----- | -----                      | GCTCAT | TGGATAGTGCGGCAGAGCGT     | TGGA | AGTACCCCTTGTTTATTGGGAAAGGC | AGT  | CGATTGCAGCTACGTGCGTGGTCC | AGGT | TAC  |      |
| APOSTART_12 (1814)     |        | -----                                         | -----  | -----                | ----- | -----                      | GCTCAT | TGGATAGTGCGGCAGAGCGT     | TGGA | AGTACCCCTTGTTTATTGGGAAAGGC | GGT  | TGATTGCAGCTACGTGCGTGGTCC | GGGT | TAC  |      |
| APOSTART_14 (1784)     |        | -----                                         | -----  | -----                | ----- | -----                      | GCTCAT | TGGATAGTGCGGCAGAGCGT     | TGGA | AGTACCCCTTGTTTATTGGGAAAGGC | GGT  | TGATTGCAGCTACGTGCGTGGTCC | GGGT | TAC  |      |
| APOSTART_15 (1880)     |        | -----                                         | -----  | -----                | ----- | -----                      | GCTCAT | TGGATAGTGCGGCAGAGCGT     | TGGA | AGTACCCCTTGTTTATTGGGAAAGGC | GGT  | TGATTGCAGCTACGTGCGTGGTCC | GGGT | TAC  |      |
| APOSTART_13 (1784)     |        | -----                                         | -----  | -----                | ----- | -----                      | GCTCAT | TGGATAGTGCGGCAGAGCGT     | TGGA | AGTACCCCTTGTTTATTGGGAAAGGC | GGT  | TGATTGCAGCTACGTGCGTGGTCC | GGGT | TAC  |      |
| APOSTART_1_GEN (4834)  |        | TCATGTCAACTCTGAAACAACGAACAACAAAAATAAATCTTCAGG | GCTCAT | TGGATAGTGCGGCAGAGCGT | TGGA  | AGTACCCCTTGTTTATTGGGAAAGGC | GGT    | CGATTGCAGCTACGTGCGTGGTCC | AGGT | TAC                        |      |                          |      |      |      |
| APOSTART_2_GEN (4800)  |        | TCATGTCAACTTTGACACAACGAACAACAAAAATAAATCTTCAGG | GCTCAT | TGGATAGTGCGGCAGAGCGT | TGGA  | AGTACCCCTTGTTTATTGGGAAAGGC | GGT    | CGATTGCAGCTACGTGCGTGGTCC | AGGT | TAC                        |      |                          |      |      |      |
| APOSTART_5_GEN (4430)  |        | TCAGCTTCACTCTGACTCCACAAACAA--ATAAAAAATGTCAGG  | GATCT  | TGGATAGTGCGGCAGAGCGT | TGG   | AGTACCCCTTGTTTATTGGGAAAGGC | CGT    | CGATTGCAGCTACGTGCGTGGTCC | AGGG | TAC                        |      |                          |      |      |      |
| APOSTART_6_GEN (4409)  |        | TACTCTTCACTCTGACTCCACAGACAA-ACAAAAAATCGTCAGG  | GATCT  | TGGATAGTGCGGCAGAGCGT | CGG   | AGTACCCCTTGTTTATTGGGAAAGGC | CGT    | CGATTGCAGCTACGTGCGTGGTCC | AGGT | TAC                        |      |                          |      |      |      |
| APOSTART_7_GEN (4874)  |        | TCATGTCAACTTTGACACAACGAACAACAAAAATAAATCTTCAGG | GCTCAT | TGGATAGTGCGGCAGAGCGT | TGGA  | AGTACCCCTTGTTTATTGGGAAAGGC | GGT    | CGATTGCAGCTACGTGCGTGGTCC | GGGT | TAC                        |      |                          |      |      |      |
| APOSTART_8_GEN (4886)  |        | TCATGTCAACTTTGACACAACGAACAACAAAAATAAATCTTCAGG | GCTCAT | TGGATAGTGCGGCAGAGCGT | TGGA  | AGTACCCCTTGTTTATTGGGAAAGGC | AGT    | CGATTGCAGCTACGTGCGTGGTCC | AGGT | TAC                        |      |                          |      |      |      |
| APOSTART_10_GEN (4830) |        | TCATGTCAACTCTGAAACAACGAACAACAAAAATAAATCTTCAGG | GCTCAT | TGGATAGTGCGGCAGAGCGT | TGGA  | AGTACCCCTTGTTTATTGGGAAAGGC | AGT    | CGATTGCAGCTACGTGCGTGGTCC | AGGT | TAC                        |      |                          |      |      |      |
| APOSTART_12_GEN (4840) |        | TCATGTCAACTTTGACACAACGAACAACAAAAATAAATCTTCAGG | GCTCAT | TGGATAGTGCGGCAGAGCGT | TGGA  | AGTACCCCTTGTTTATTGGGAAAGGC | GGT    | TGATTGCAGCTACGTGCGTGGTCC | GGGT | TAC                        |      |                          |      |      |      |



|                        | (5093) | 5093     | 5100                                                                                                                            | 5110 | 5120 | 5130 | 5140 | 5150 | 5160 | 5170 | 5180 | 5190 | 5200 | 5210 | 5226 |
|------------------------|--------|----------|---------------------------------------------------------------------------------------------------------------------------------|------|------|------|------|------|------|------|------|------|------|------|------|
| APOSTART 1 (1900)      |        | TTGGAAGT |                                                                                                                                 |      |      |      |      |      |      |      |      |      |      |      |      |
| APOSTART 2 (1900)      |        | TTAGAAGT |                                                                                                                                 |      |      |      |      |      |      |      |      |      |      |      |      |
| APOSTART_3 (1900)      |        | TTGGAAGT |                                                                                                                                 |      |      |      |      |      |      |      |      |      |      |      |      |
| APOSTART_4 (1903)      |        | TTGGAAGT |                                                                                                                                 |      |      |      |      |      |      |      |      |      |      |      |      |
| APOSTART_5 (1900)      |        | TTGGAAGT |                                                                                                                                 |      |      |      |      |      |      |      |      |      |      |      |      |
| APOSTART_6 (1900)      |        | TTGGAAGT |                                                                                                                                 |      |      |      |      |      |      |      |      |      |      |      |      |
| APOSTART 7 (1903)      |        | TTGGAAGT |                                                                                                                                 |      |      |      |      |      |      |      |      |      |      |      |      |
| APOSTART_8 (1876)      |        | TTGGAAGT |                                                                                                                                 |      |      |      |      |      |      |      |      |      |      |      |      |
| APOSTART_9 (1900)      |        | TTGGAAGT |                                                                                                                                 |      |      |      |      |      |      |      |      |      |      |      |      |
| APOSTART_10 (1885)     |        | TTGGAAGT |                                                                                                                                 |      |      |      |      |      |      |      |      |      |      |      |      |
| APOSTART_11 (1897)     |        | TTGGAAGT |                                                                                                                                 |      |      |      |      |      |      |      |      |      |      |      |      |
| APOSTART_12 (1903)     |        | TTGGAAGT |                                                                                                                                 |      |      |      |      |      |      |      |      |      |      |      |      |
| APOSTART_14 (1873)     |        | TTGGAAGT |                                                                                                                                 |      |      |      |      |      |      |      |      |      |      |      |      |
| APOSTART_15 (1969)     |        | TTGGAAGT |                                                                                                                                 |      |      |      |      |      |      |      |      |      |      |      |      |
| APOSTART_13 (1873)     |        | TTGGAAGT |                                                                                                                                 |      |      |      |      |      |      |      |      |      |      |      |      |
| APOSTART_1_GEN (4968)  |        | TTGGAAGT | AAGTCATGCA-TCCGTTTTCCATCTACTGGCGA-----AATATCA---TAGAGTACTAGC---AAAATTTTATCATCGTTATTATTTCATTTTTTAACATGGAATGCATCCTGATCGGTGTTT     |      |      |      |      |      |      |      |      |      |      |      |      |
| APOSTART_2_GEN (4934)  |        | TTAGAAGT | AAGTCATGCA-TCCGTTTTCCATCTACTGGCGA-----AATATCA---TAGAGTACTAGC---AACATTTTATCATCGTTATTATTTCATTTTTTAACATGGAATGCATCCTGATCGGTGTTT     |      |      |      |      |      |      |      |      |      |      |      |      |
| APOSTART_5_GEN (4561)  |        | TTGGAAGT | AAGTCATATACTTTTTTTTCCATCTCATGTTACAAACATAAAAATGGTCAGTAGAGTTATAGTCCAGACACTGAGTACTCATTATTATTTCATTTTTAAACAT-GAATGCACCTTTGATTGATATTT |      |      |      |      |      |      |      |      |      |      |      |      |
| APOSTART_6_GEN (4542)  |        | TTGGAAGT | AAGTCATTTA-GTTTTTTTCCATCTTGATGCA-----CA-----A-----TATAAAAATGGTGAGTAGAATTATGGAAAATGAATGCATTTTGAGTGGTATTT                         |      |      |      |      |      |      |      |      |      |      |      |      |
| APOSTART_7_GEN (5008)  |        | TTGGAAGT | AAGTCGTGCA-TCCGTTTTCCATCTACTGGCGA-----AATATCATGCATAGAGTACTAGC---GAAATTTTATGGTCGTTGTTATTTCATTTTTTAACATGGAATGCATCCTGATCGGTGTTT    |      |      |      |      |      |      |      |      |      |      |      |      |
| APOSTART_8_GEN (5020)  |        | TTGGAAGT | AAGTCGTGCA-TCCGTTTTCCATCTACTGGCGA-----AATATCATGCATAGAGTACTAGC---GAAATTTTATGGTCGTTGTTATTTCATTTTTTAACATGGAATGCATCCTGATCGGTGTTT    |      |      |      |      |      |      |      |      |      |      |      |      |
| APOSTART_10_GEN (4964) |        | TTGGAAGT | AAGTCATGCA-TCCGTTTTCCATCTACTGGCGA-----AATATCA---TAGAGTACTAGC---AAAATTTTATCATCGTTATTATTTCATTTTTTAACATGGAATGCATCCCGATCGGTGTTT     |      |      |      |      |      |      |      |      |      |      |      |      |
| APOSTART_12_GEN (4974) |        | TTGGAAGT | AAGTCGTGCA-TCCGTTTTCCATCTACTGGCGA-----AATATCATGCATAGAGTACTAGC---GAAATTTTATGGTCGTTGTTATTTCATTTTTTAACATGGAATGCATCCTGATCGGTGTTT    |      |      |      |      |      |      |      |      |      |      |      |      |

|                        | (5227)    | 5227 | 5240         | 5250         | 5260      | 5270                           | 5280 | 5290                                 | 5300                     | 5310 | 5320 | 5330 | 5340 | 5350 | 5360 |
|------------------------|-----------|------|--------------|--------------|-----------|--------------------------------|------|--------------------------------------|--------------------------|------|------|------|------|------|------|
| APOSTART 1 (1908)      |           |      | GGATGTTGACAT | CGGTTCTTCGGC | GGTGGCCAA | TGGGGTTTTGGGCCTGGTGTTTGGTGTTGT | CA   | CAACATTGGTAGTTGACATGGCCTTCCTAATACAGG |                          |      |      |      |      |      |      |
| APOSTART 2 (1908)      |           |      | GGATGTTGACAT | TGGTTCTTCGGC | GGTGGCCAA | TGGGGTTTTGGGCCTGGTGTTTGGTGTTGT | CA   | CAACATTGGTAGTTGACATGGCCTTCCTAATACAGG |                          |      |      |      |      |      |      |
| APOSTART_3 (1908)      |           |      | GGATGTTGACAT | CGGTTCTTCGGC | GGTGGCCAA | TGGGGTTTTGGGCCTGGTGTTTGGTGTTGT | CA   | CAACATTGGTAGTTGACATGGCCTTCCTAATACAGG |                          |      |      |      |      |      |      |
| APOSTART_4 (1911)      |           |      | GGATGTTGACAT | TGGTTCTTCGGC | GGTGGCCAA | TGGGGTTTTGGGCCTGGTGTTTGGTGTTGT | CA   | CAACATTGGTAGTTGACATGGCCTTCCTAATACAGG |                          |      |      |      |      |      |      |
| APOSTART_5 (1908)      |           |      | GGATGTTGACAT | AGGTTCTTCGGC | GGTGGCCAA | CGGCGTTTTGGGCCTGGTGTTTGGTGTTGT | CA   | CAACATTGGTAGTTGACATGGCCTTCCTAATACAGG |                          |      |      |      |      |      |      |
| APOSTART_6 (1908)      |           |      | GGATGTTGACAT | CGGTTCTTCGGC | AGTGGCCAA | CGGCGTTTTGGGCCTGGTGTTTGGTGTTGT | TG   | CAACATTGGTAGTTGACATGGCCTTCCTAATACAGG |                          |      |      |      |      |      |      |
| APOSTART 7 (1911)      |           |      | GGATGTTGACAT | TGGTTCTTCGGC | GGTGGCCAA | TGGGGTTTTGGGCCTGGTGTTTGGTGTTGT | CA   | CAACATTGGTAGTTGACATGGCCTTCCTAATACAGG |                          |      |      |      |      |      |      |
| APOSTART_8 (1884)      |           |      | GGATGTTGACAT | TGGTTCTTCGGC | GGTGGCCAA | TGGGGTTTTGGGCCTGGTGTTTGGTGTTGT | CA   | CAACATTGGTAGTTGACATGGCCTTCCTAATACAGG |                          |      |      |      |      |      |      |
| APOSTART_9 (1908)      |           |      | GGATGTTGACAT | TGGTTCTTCGGC | GGTGGCCAA | TGGGGTTTTGGGCCTGGTGTTTGGTGTTGT | CA   | CAACATTGGTAGTTGACATGGCCTTCCTAATACAGG |                          |      |      |      |      |      |      |
| APOSTART_10 (1893)     |           |      | GGATGTTGACAT | TGGTTCTTCGGC | GGTGGCCAA | TGGGGTTTTGGGCCTGGTGTTTGGTGTTGT | CA   | CAACATTGGTAGTTGACATGGCCTTCCTAATACAGG |                          |      |      |      |      |      |      |
| APOSTART_11 (1905)     |           |      | GGATGTTGACAT | TGGTTCTTCGGC | GGTGGCCAA | TGGGGTTTTGGGCCTGGTGTTTGGTGTTGT | CA   | CAACATTGGTAGTTGACATGGCCTTCCTAATACAGG |                          |      |      |      |      |      |      |
| APOSTART_12 (1911)     |           |      | GGATGTTGACAT | TGGTTCTTCGGC | GGTGGCCAA | TGGGGTTTTGGGCCTGGTGTTTGGTGTTGT | CA   | CAACATTGGTAGTTGACATGGCCTTCCTAATACAGG |                          |      |      |      |      |      |      |
| APOSTART_14 (1881)     |           |      | GGATGTTGACAT | TGGTTCTTCGGC | GGTGGCCAA | TGGGGTTTTGGGCCTGGTGTTTGGTGTTGT | CA   | CAACATTGGTAGTTGACATGGCCTTCCTAATACAGG |                          |      |      |      |      |      |      |
| APOSTART_15 (1977)     |           |      | GGATGTTGACAT | TGGTTCTTCGGC | GGTGGCCAA | TGGGGTTTTGGGCCTGGTGTTTGGTGTTGT | CA   | CAACATTGGTAGTTGACATGGCCTTCCTAATACAGG |                          |      |      |      |      |      |      |
| APOSTART_13 (1881)     |           |      | GGATGTTGACAT | TGGTTCTTCGGC | GGTGGCCAA | TGGGGTTTTGGGCCTGGTGTTTGGTGTTGT | CA   | CAACATTGGTAGTTGACATGGCCTTCCTAATACAGG |                          |      |      |      |      |      |      |
| APOSTART_1_GEN (5087)  | TCTTCAGGT |      | GGATGTTGACAT | CGGTTCTTCGGC | GGTGGCCAA | TGGGGTTTTGGGCCTGGTGTTTGGTGTTGT | CA   | CAACATTGGTAGTTGACATGGCCTTCCTAATACAGG | TAAGAGACCCCAGTGGCTAATGCA |      |      |      |      |      |      |
| APOSTART_2_GEN (5053)  | TCTTCAGGT |      | GGATGTTGACAT | TGGTTCTTCGGC | GGTGGCCAA | TGGGGTTTTGGGCCTGGTGTTTGGTGTTGT | CA   | CAACATTGGTAGTTGACATGGCCTTCCTAATACAGG | TAAGAGACCCCAGTGGCTAATGCA |      |      |      |      |      |      |
| APOSTART_5_GEN (4694)  | TCTGCAGGT |      | GGATGTTGACAT | AGGTTCTTCGGC | GGTGGCCAA | CGGCGTTTTGGGCCTGGTGTTTGGTGTTGT | CA   | CAACATTGGTAGTTGACATGGCCTTCCTAATACAGG | TAAGGGACCCCAATTGCTATTTGA |      |      |      |      |      |      |
| APOSTART_6_GEN (4638)  | TCTGCAGGT |      | GGATGTTGACAT | CGGTTCTTCGGC | AGTGGCCAA | CGGCGTTTTGGGCCTGGTGTTTGGTGTTGT | TG   | CAACATTGGTAGTTGACATGGCCTTCCTAATACAGG | TAAGGGACCCCAATTGCTATTGCA |      |      |      |      |      |      |
| APOSTART_7_GEN (5131)  | TTTGCAGGT |      | GGATGTTGACAT | TGGTTCTTCGGC | GGTGGCCAA | TGGGGTTTTGGGCCTGGTGTTTGGTGTTGT | CA   | CAACATTGGTAGTTGACATGGCCTTCCTAATACAGG | TAAGAGACCCTAGTTGCTAATGCA |      |      |      |      |      |      |
| APOSTART_8_GEN (5143)  | TTTGCAGGT |      | GGATGTTGACAT | TGGTTCTTCGGC | GGTGGCCAA | TGGGGTTTTGGGCCTGGTGTTTGGTGTTGT | CA   | CAACATTGGTAGTTGACATGGCCTTCCTAATACAGG | TAAGAGACCCTAGTTGCTAATGCA |      |      |      |      |      |      |
| APOSTART_10_GEN (5083) | TCTTCAGGT |      | GGATGTTGACAT | TGGTTCTTCGGC | GGTGGCCAA | TGGGGTTTTGGGCCTGGTGTTTGGTGTTGT | CA   | CAACATTGGTAGTTGACATGGCCTTCCTAATACAGG | TAAGAGACCCCAGTGGCTAATGCA |      |      |      |      |      |      |
| APOSTART_12_GEN (5097) | TTTGCAGGT |      | GGATGTTGACAT | TGGTTCTTCGGC | GGTGGCCAA | TGGGGTTTTGGGCCTGGTGTTTGGTGTTGT | CA   | CAACATTGGTAGTTGACATGGCCTTCCTAATACAGG | TAAGAGACCCTAGTTGCTAATGCA |      |      |      |      |      |      |

|                        | (5361) | 5361                                                                         | 5370           | 5380         | 5390          | 5400       | 5410    | 5420  | 5430  | 5440           | 5450         | 5460          | 5470       | 5480    | 5494  |
|------------------------|--------|------------------------------------------------------------------------------|----------------|--------------|---------------|------------|---------|-------|-------|----------------|--------------|---------------|------------|---------|-------|
| APOSTART 1 (2009)      |        | -----                                                                        | -----          | -----        | -----         | -----      | -----   | ----- | ----- | CTAACACGTATGAC | GAGCTCCCAGAG | CAAGTGATCGGT  | GCAGCCCGGC | TGGCCCA | CGT   |
| APOSTART 2 (2009)      |        | -----                                                                        | -----          | -----        | -----         | -----      | -----   | ----- | ----- | CAAACACGTATGAT | GAGCTCCCAGAG | CAAGTGATCGGT  | GCAGCCCGGC | TGGCCCA | TGT   |
| APOSTART_3 (2009)      |        | -----                                                                        | -----          | -----        | -----         | -----      | -----   | ----- | ----- | CTAACACGTATGAC | GAGCTCCCAGAG | CAAGTGATCGGT  | GCAGCCCGGC | TGGCCCA | CGT   |
| APOSTART_4 (2012)      |        | -----                                                                        | -----          | -----        | -----         | -----      | -----   | ----- | ----- | CGAACACGTATGAC | GAGCTCCCAGAG | CAGGTGATCGGT  | GCAGCCCGGC | TGGCCCA | CGT   |
| APOSTART_5 (2009)      |        | -----                                                                        | -----          | -----        | -----         | -----      | -----   | ----- | ----- | CGAACACGTATGAC | GAGCTCCCAGAG | CAGGTGATCGGT  | GCAGCCCGGC | TGGCCCA | TGT   |
| APOSTART_6 (2009)      |        | -----                                                                        | -----          | -----        | -----         | -----      | -----   | ----- | ----- | CGAACACGTATGAT | GAGCTCCCAGA  | ACAGGTGATCGGT | GCAGCCCGAT | TGGCCCA | CGT   |
| APOSTART 7 (2012)      |        | -----                                                                        | -----          | -----        | -----         | -----      | -----   | ----- | ----- | CGAACACGTATGAC | GAGCTCCCAGAG | CAGGTGATCGGT  | GCAGCCCGGC | TGGCT   | CACGT |
| APOSTART_8 (1985)      |        | -----                                                                        | -----          | -----        | -----         | -----      | -----   | ----- | ----- | CTAACACGTATGAC | GAGCTCCCAGAG | CAAGTGATCGGT  | GCAGCCCGGC | TGGCCCA | CGT   |
| APOSTART_9 (2009)      |        | -----                                                                        | -----          | -----        | -----         | -----      | -----   | ----- | ----- | CTAACACGTATGAC | GAGCTCCCAGAG | CAAGTGATCGGT  | GCAGCCCGGC | TGGCCCA | CGT   |
| APOSTART_10 (1994)     |        | -----                                                                        | -----          | -----        | -----         | -----      | -----   | ----- | ----- | CTAACACGTATGAC | GAGCTCCCAGAG | CAAGTGATCGGT  | GCAGCCCGGC | TGGCCCA | CGT   |
| APOSTART_11 (2006)     |        | -----                                                                        | -----          | -----        | -----         | -----      | -----   | ----- | ----- | CTAACACGTATGAC | GAGCTCCCAGAG | CAAGTGATCGGT  | GCAGCCCGGC | TGGCCCA | CGT   |
| APOSTART_12 (2012)     |        | -----                                                                        | -----          | -----        | -----         | -----      | -----   | ----- | ----- | CGAACACGTATGAC | GAGCTCCCAGAG | CAGGTGATCGGT  | GCAGCCCGGC | TGGCCCA | CGT   |
| APOSTART_14 (1982)     |        | -----                                                                        | -----          | -----        | -----         | -----      | -----   | ----- | ----- | CGAACACGTATGAC | GAGCTCCCAGAG | CAGGTGATCGGT  | GCAGCCCGGC | TGGCCCA | CGT   |
| APOSTART_15 (2078)     |        | -----                                                                        | -----          | -----        | -----         | -----      | -----   | ----- | ----- | CGAACACGTATGAC | GAGCTCCCAGAG | CAGGTGATCGGT  | GCAGCCCGGC | TGGCCCA | CGT   |
| APOSTART_13 (1982)     |        | -----                                                                        | -----          | -----        | -----         | -----      | -----   | ----- | ----- | CGAACACGTATGAC | GAGCTCCCAGAG | CAGGTGATCGGT  | GCAGCCCGGC | TGGCCCA | CGT   |
| APOSTART_1_GEN (5221)  |        | AAATCCTGAGTTGACTGAAGAAGAGAAAATCTAGTACGGTCTTATCATTGTACGGTTCATTTTATGAACTTGCAGG | CTAACACGTATGAC | GAGCTCCCAGAG | CAAGTGATCGGT  | GCAGCCCGGC | TGGCCCA | CGT   |       |                |              |               |            |         |       |
| APOSTART_2_GEN (5187)  |        | AAATCCTGAGTTGACTGAAGAAGAGAAAATCTAGTACGGTCTTATCATTGTACGGTTCATCTTATGAACTTGCAGG | CAAACACGTATGAT | GAGCTCCCAGAG | CAAGTGATCGGT  | GCAGCCCGGC | TGGCCCA | TGT   |       |                |              |               |            |         |       |
| APOSTART_5_GEN (4828)  |        | GAACCATGAGTAGACTGAAGAAGAGAAAATCTAGTATGGTCTTATCATTGTACGTTTCATATAATGAATTTGCAGG | CGAACACGTATGAC | GAGCTCCCAGAG | CAGGTGATCGGT  | GCAGCCCGAT | TGGCCCA | TGT   |       |                |              |               |            |         |       |
| APOSTART_6_GEN (4772)  |        | AAC-CATGAGTAGACTGAAGAAGATAAA-TCTAGTATGGTCTTATCATTGAACGCTTCATATTCTGAATTTGCAGG | CGAACACGTATGAT | GAGCTCCCAGA  | ACAGGTGATCGGT | GCAGCCCGAT | TGGCCCA | CGT   |       |                |              |               |            |         |       |
| APOSTART_7_GEN (5265)  |        | AAATCATGAGTTGACTGAAGAAGAGAAAATCTAGTATGGTCTTAGCGTTGTACGGTTCATCTTATGAACTTGTAGG | CGAACACGTATGAC | GAGCTCCCAGAG | CAGGTGATCGGT  | GCAGCCCGGC | TGGCT   | CACGT |       |                |              |               |            |         |       |
| APOSTART_8_GEN (5277)  |        | AAATCATGAGTTGACTGAAGAAGAGAAAATCTAGTATGGTCTTAGCGTTGTACGGTTCATCTTATGAACTTGTAGG | CTAACACGTATGAC | GAGCTCCCAGAG | CAAGTGATCGGT  | GCAGCCCGGC | TGGCCCA | CGT   |       |                |              |               |            |         |       |
| APOSTART_10_GEN (5217) |        | AAATCCTGAGTTGACTGAAGAAGAGAAAATCTAGTACGGTCTTATCATTGTACGGTTCATTTTATGAACTTGCAGG | CTAACACGTATGAC | GAGCTCCCAGAG | CAAGTGATCGGT  | GCAGCCCGGC | TGGCCCA | CGT   |       |                |              |               |            |         |       |
| APOSTART_12_GEN (5231) |        | AAATCATGAGTTGACTGAAGAAGAGAAAATCTAGTATGGTCTTAGCGTTGTACGGTTCATCTTATGAACTTGTAGG | CGAACACGTATGAC | GAGCTCCCAGAG | CAGGTGATCGGT  | GCAGCCCGGC | TGGCCCA | CGT   |       |                |              |               |            |         |       |

|                        | (5495) | 5495      | 5500     | 5510 | 5520        | 5530 | 5540         | 5550       | 5560         | 5570        | 5580         | 5590  | 5600         | 5610                | 5621                |                            |                            |                    |                    |                            |                            |
|------------------------|--------|-----------|----------|------|-------------|------|--------------|------------|--------------|-------------|--------------|-------|--------------|---------------------|---------------------|----------------------------|----------------------------|--------------------|--------------------|----------------------------|----------------------------|
| APOSTART 1 (2067)      |        | TGAACCGGC | GCAGC    | G    | GTAGTACCTGA | C    | TTGACAATAACA | G          | TGATAGTAAAGA | TAGCAGCAACG | ATG          | ----- | ACAAC        | CAACAATAACACTTCCTCG | GATG                | ACGACTCGTCCAAGAAAACCAACTGA |                            |                    |                    |                            |                            |
| APOSTART 2 (2067)      |        | TGAACCGGC | GCAGC    | G    | GTAGTACCTGA | C    | TTGACAATAACA | G          | TGATAGTAAAGA | TAGCAGCAACG | CTG          | ----- | ACAAC        | CAACAATAACACTTCCTCG | GAGG                | ACGACTCGTCCAAGAAAACCAACTGA |                            |                    |                    |                            |                            |
| APOSTART_3 (2067)      |        | TGAACCGGC | GCAGC    | G    | GTAGTACCTGA | C    | TTGACAATAACA | G          | TGATAGTAAAGA | TAGCAGCAACG | ATG          | ----- | ACAAC        | CAACAATAACACTTCCTCG | GATG                | ACGACTCGTCCAAGAAAACCAACTGA |                            |                    |                    |                            |                            |
| APOSTART_4 (2070)      |        | TGAACCGGC | GCAGC    | G    | GTAGTACCTGA | C    | TTGACAATAACA | G          | TGATAGTAAAGA | TAGCAGCAACG | ATG          | ----- | ACAAC        | CAACAATAACACTTCCTCG | GAGG                | ACGACTCGTCCAAGAAAACCAACTGA |                            |                    |                    |                            |                            |
| APOSTART_5 (2067)      |        | C         | GAACCGGC | A    | GCAGC       | C    | G            | TAGTACCTGA | T            | C           | TTGACAATAACA | A     | TGATAGTAAAGA | TAGCAGCAACG         | ATG                 | -----                      | ACAAC                      | T                  | AACAATAACACTTCCTCG | GAGG                       | ACGACTCGTCCAAGAAAACCAACTGA |
| APOSTART_6 (2067)      |        | C         | GAACCGGC | T    | GCAGC       | G    | GTAGTACCTGA  | C          | TTGACAATAACA | A           | TGATAGTAAAGA | TAT   | CAGCAACG     | ATG                 | AACAATA             | ACAAC                      | T                          | AACAATAACACTTCCTCG | GAGT               | ACGACTCGTCCAAGAAAACCAACTGA |                            |
| APOSTART 7 (2070)      |        | TGAACCGGC | GCAGC    | G    | GTAGTACCTGA | C    | TTGACAATAACA | G          | TGATAGTAAAGA | TAGCAGCAACG | ATG          | ----- | ACAAC        | CAACAATAACACTTCCTCG | GAGG                | ACGACTCGTCCAAGAAAACCAACTGA |                            |                    |                    |                            |                            |
| APOSTART_8 (2043)      |        | TGAACCGGC | GCAGC    | G    | GTAGTACCTGA | C    | TTGACAATAACA | G          | TGATAGTAAAGA | TAGCAGCAACG | ATG          | ----- | ACAAC        | CAACAATAACACTTCCTCG | GAGG                | ACGACTCGTCCAAGAAAACCAACTGA |                            |                    |                    |                            |                            |
| APOSTART_9 (2067)      |        | TGAACCGGC | GCAGC    | G    | GTAGTACCTGA | C    | TTGACAATAACA | G          | TGATAGTAAAGA | TAGCAGCAACG | ATG          | ----- | ACAAC        | CAACAATAACACTTCCTCG | GAGG                | ACGACTCGTCCAAGAAAACCAACTGA |                            |                    |                    |                            |                            |
| APOSTART_10 (2052)     |        | TGAACCGGC | GCAGC    | G    | GTAGTACCTGA | C    | TTGACAATAACA | G          | TGATAGTAAAGA | TAGCAGCAACG | ATG          | ----- | ACAAC        | CAACAATAACACTTCCTCG | GACG                | ACGACTCGTCCAAGAAAACCAACTGA |                            |                    |                    |                            |                            |
| APOSTART_11 (2064)     |        | TGAACCGGC | GCAGC    | G    | GTAGTACCTGA | C    | TTGACAATAACA | G          | TGATAGTAAAGA | TAGCAGCAACG | ATG          | ----- | ACAAC        | CAACAATAACACTTCCTCG | GAGG                | ACGACTCGTCCAAGAAAACCAACTGA |                            |                    |                    |                            |                            |
| APOSTART_12 (2070)     |        | TGAACCGGC | GCAGC    | G    | GTAGTACCTGA | C    | TTGACAATAACA | G          | TGATAGTAAAGA | TAGCAGCAACG | ATG          | ----- | ACAAC        | CAACAATAACACTTCCTCG | GAGG                | ACGACTCGTCCAAGAAAACCAACTGA |                            |                    |                    |                            |                            |
| APOSTART_14 (2040)     |        | TGAACCGGC | GCAGC    | G    | GTAGTACCTGA | C    | TTGACAATAACA | G          | TGATAGTAAAGA | -           | AGCAGCAACG   | AT    | -----        | ACAAC               | CAACAATAACACTTCCTCG | GAGG                       | ACGACTCGTCCAAGAAAACCAACTGA |                    |                    |                            |                            |
| APOSTART_15 (2136)     |        | TGAACCGGC | GCAGC    | G    | GTAGTACCTGA | C    | TTGACAATAACA | G          | TGATAGTAAAGA | TAGCAGCAACG | ATG          | ----- | ACAAC        | CAACAATAACACTTCCTCG | A                   | GG                         | ACGACTCGTCCAAGAAAACCAACTGA |                    |                    |                            |                            |
| APOSTART_13 (2040)     |        | TGAACCGGC | GCAGC    | G    | GTAGTACCTGA | C    | TTGACAATAACA | G          | TGATAGTAAAGA | TAGCAGCAACG | ATG          | ----- | ACAAC        | CAACAATAACACTTCCTCG | GAGG                | ACGACTCGTCCAAGAAAACCAACTGA |                            |                    |                    |                            |                            |
| APOSTART_1_GEN (5355)  |        | TGAACCGGC | GCAGC    | G    | GTAGTACCTGA | C    | TTGACAATAACA | G          | TGATAGTAAAGA | TAGCAGCAACG | ATG          | ----- | ACAAC        | CAACAATAACACTTCCTCG | GATG                | ACGACTCGTCCAAGAAAACCAACTGA |                            |                    |                    |                            |                            |
| APOSTART_2_GEN (5321)  |        | TGAACCGGC | GCAGC    | G    | GTAGTACCTGA | C    | TTGACAATAACA | G          | TGATAGTAAAGA | TAGCAGCAACG | CTG          | ----- | ACAAC        | CAACAATAACACTTCCTCG | GAGG                | ACGACTCGTCCAAGAAAACCAACTGA |                            |                    |                    |                            |                            |
| APOSTART_5_GEN (4962)  |        | C         | GAACCGGC | A    | GCAGC       | C    | G            | TAGTACCTGA | T            | C           | TTGACAATAACA | A     | TGATAGTAAAGA | TAGCAGCAACG         | ATG                 | -----                      | ACAAC                      | T                  | AACAATAACACTTCCTCG | GAGG                       | ACGACTCGTCCAAGAAAACCAACTGA |
| APOSTART_6_GEN (4904)  |        | C         | GAACCGGC | T    | GCAGC       | G    | GTAGTACCTGA  | C          | TTGACAATAACA | A           | TGATAGTAAAGA | TAT   | CAGCAACG     | ATG                 | AACAATA             | ACAAC                      | T                          | AACAATAACACTTCCTCG | GAGT               | ACGACTCGTCCAAGAAAACCAACTGA |                            |
| APOSTART_7_GEN (5399)  |        | TGAACCGGC | GCAGC    | G    | GTAGTACCTGA | C    | TTGACAATAACA | G          | TGATAGTAAAGA | TAGCAGCAACG | ATG          | ----- | ACAAC        | CAACAATAACACTTCCTCG | GAGG                | ACGACTCGTCCAAGAAAACCAACTGA |                            |                    |                    |                            |                            |
| APOSTART_8_GEN (5411)  |        | TGAACCGGC | GCAGC    | G    | GTAGTACCTGA | C    | TTGACAATAACA | G          | TGATAGTAAAGA | TAGCAGCAACG | ATG          | ----- | ACAAC        | CAACAATAACACTTCCTCG | GAGG                | ACGACTCGTCCAAGAAAACCAACTGA |                            |                    |                    |                            |                            |
| APOSTART_10_GEN (5351) |        | TGAACCGGC | GCAGC    | G    | GTAGTACCTGA | C    | TTGACAATAACA | G          | TGATAGTAAAGA | TAGCAGCAACG | ATG          | ----- | ACAAC        | CAACAATAACACTTCCTCG | GACG                | ACGACTCGTCCAAGAAAACCAACTGA |                            |                    |                    |                            |                            |
| APOSTART_12_GEN (5365) |        | TGAACCGGC | GCAGC    | G    | GTAGTACCTGA | C    | TTGACAATAACA | G          | TGATAGTAAAGA | TAGCAGCAACG | ATG          | ----- | ACAAC        | CAACAATAACACTTCCTCG | GAGG                | ACGACTCGTCCAAGAAAACCAACTGA |                            |                    |                    |                            |                            |
